# Supplementary material for: Highly asymmetric cobalt-catalyzed aziridination of alkenes with trichloroethoxysulfonyl azide (TcesN3)
Source: Royal Society of Chemistry journal article supplement (doi:10.1039/b905727g), 2009-01-01
Supplement: b905727g.pdf [file b905727g.pdf]

## Supporting Information

### **Highly Asymmetric Cobalt-Catalyzed Aziridination of Alkenes with Trichloroethoxysulfonyl Azide (TcesN<sub>3</sub>)**

Velusamy Subbarayan, Joshua V. Ruppel, Shifa Zhu, Jason A. Perman and  
X. Peter Zhang

*Department of Chemistry, University of South Florida, Tampa, Florida 33620-5250*

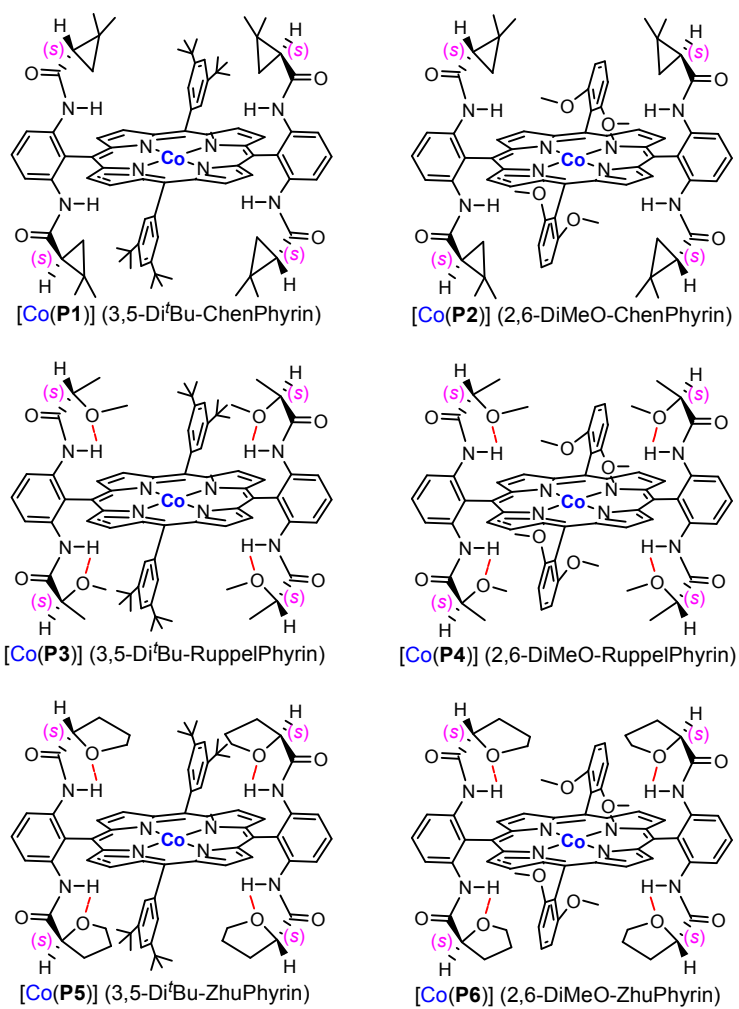

**Figure S1.** Structures of  $D_2$ -Symmetric Chiral Cobalt(II) Porphyrins.

**Table S1.** Enantioselective Aziridination of Styrene with Trichloroethoxysulfonyl Azide by Chiral Cobalt(II) Porphyrins.<sup>a</sup>

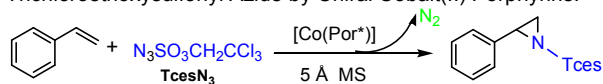

| entry           | [Co(Por*)] <sup>b</sup> | mol (%) | solvent                                       | temp (°C) | yield (%) <sup>c</sup> | ee (%) <sup>d</sup> |
|-----------------|-------------------------|---------|-----------------------------------------------|-----------|------------------------|---------------------|
| 1               | [Co(P1)]                | 2.0     | C <sub>6</sub> H <sub>6</sub>                 | RT        | 78                     | 21                  |
| 2               | [Co(P1)]                | 2.0     | C <sub>6</sub> H <sub>5</sub> Cl              | RT        | 80                     | 25                  |
| 3               | [Co(P1)]                | 2.0     | C <sub>2</sub> H <sub>4</sub> Cl <sub>2</sub> | RT        | 88                     | 25                  |
| 4               | [Co(P2)]                | 2.0     | C <sub>6</sub> H <sub>5</sub> Cl              | RT        | 84                     | 4                   |
| 5               | [Co(P3)]                | 2.0     | C <sub>6</sub> H <sub>5</sub> Cl              | RT        | 90                     | -39                 |
| 6               | [Co(P4)]                | 2.0     | C <sub>6</sub> H <sub>6</sub>                 | RT        | 78                     | -40                 |
| 7               | [Co(P4)]                | 2.0     | C <sub>6</sub> H <sub>5</sub> Cl              | RT        | 95                     | -51                 |
| 8               | [Co(P4)]                | 2.0     | C <sub>2</sub> H <sub>4</sub> Cl <sub>2</sub> | RT        | 60                     | -39                 |
| 9               | [Co(P5)]                | 2.0     | C <sub>6</sub> H <sub>5</sub> Cl              | RT        | 85                     | 52                  |
| 10              | [Co(P6)]                | 2.0     | C <sub>6</sub> H <sub>5</sub> Cl              | RT        | 58                     | 86                  |
| 11              | [Co(P6)]                | 2.0     | C <sub>6</sub> H <sub>5</sub> Cl              | 40        | 70                     | 70                  |
| 12              | [Co(P6)]                | 3.0     | C <sub>6</sub> H <sub>5</sub> Cl              | RT        | 79                     | 88                  |
| 13              | [Co(P6)]                | 3.0     | C <sub>2</sub> H <sub>4</sub> Cl <sub>2</sub> | 40        | 56                     | 66                  |
| 14              | [Co(P6)]                | 5.0     | C <sub>6</sub> H <sub>5</sub> Cl              | RT        | 90                     | 88                  |
| 15              | [Co(P6)]                | 5.0     | C <sub>6</sub> H <sub>5</sub> Cl              | 40        | 84                     | 76                  |
| 16              | [Co(P6)]                | 5.0     | C <sub>6</sub> H <sub>5</sub> Cl              | 0         | 69                     | 94                  |
| 17 <sup>e</sup> | [Co(P6)]                | 5.0     | C <sub>6</sub> H <sub>5</sub> Cl              | 0         | 91                     | 94                  |
| 18              | [Co(P6)]                | 5.0     | C <sub>6</sub> H <sub>5</sub> Cl              | -10       | 15                     | 96                  |
| 19 <sup>e</sup> | [Co(P6)]                | 5.0     | C <sub>6</sub> H <sub>5</sub> Cl              | -10       | 59                     | 96                  |

<sup>a</sup> Performed in chlorobenzene for 24 h under N<sub>2</sub> in the presence of 4 Å molecular sieves: alkene:TcesN<sub>3</sub> = 5.0:1.0; [alkene] = 0.25 M. <sup>b</sup> See Figure 1 for structures. <sup>c</sup> Isolated yields. <sup>d</sup> Determined by chiral HPLC. <sup>e</sup> In the presence of 5 mol % Pd(OAc)<sub>2</sub>.

**Table S2.** [Co(P6)]-Catalyzed Enantioselective Aziridination of Different Alkenes with Trichloroethoxysulfonyl Azide (TcesN<sub>3</sub>).<sup>a</sup>

| entry             | olefin | aziridine | temp (°C) | yield (%) <sup>b</sup> | ee (%) <sup>c</sup> | [α] <sup>d</sup> |
|-------------------|--------|-----------|-----------|------------------------|---------------------|------------------|
| 1                 |        |           | RT        | 90                     | 88                  |                  |
| 2                 |        |           | 0         | 69                     | 94                  |                  |
| 3 <sup>f</sup>    |        |           | 0         | 91                     | 94                  | (-)              |
| 4 <sup>f,g</sup>  |        |           | 0         | 60                     | 94                  |                  |
| 5 <sup>f</sup>    |        |           | -10       | 59                     | 96                  |                  |
| 6                 |        |           | RT        | 84                     | 79                  |                  |
| 7                 |        |           | 0         | 72                     | 77                  | (-)              |
| 8 <sup>f</sup>    |        |           | 0         | 89                     | 90                  |                  |
| 9                 |        |           | RT        | 85                     | 82                  | (-)              |
| 10                |        |           | RT        | 86                     | 84                  | (-)              |
| 11                |        |           | RT        | 88                     | 82                  |                  |
| 12                |        |           | 0         | 65                     | 85                  | (-)              |
| 13 <sup>f</sup>   |        |           | 0         | 89                     | 85                  |                  |
| 14                |        |           | RT        | 90                     | 84                  | (-)              |
| 15                |        |           | 0         | 71                     | 91                  | (-)              |
| 16 <sup>f</sup>   |        |           | 0         | 93                     | 91                  | (R) <sup>e</sup> |
| 17                |        |           | RT        | 90                     | 83                  |                  |
| 18                |        |           | 0         | 69                     | 91                  | (-)              |
| 19 <sup>f</sup>   |        |           | 0         | 92                     | 91                  |                  |
| 20                |        |           | RT        | 92                     | 85                  |                  |
| 21                |        |           | 0         | 72                     | 90                  | (-)              |
| 22 <sup>f</sup>   |        |           | 0         | 90                     | 90                  |                  |
| 23                |        |           | RT        | 94                     | 80                  |                  |
| 24                |        |           | 0         | 66                     | 88                  | (-)              |
| 25 <sup>f</sup>   |        |           | 0         | 91                     | 88                  |                  |
| 26                |        |           | RT        | 95                     | 96                  |                  |
| 27                |        |           | 0         | 68                     | 99                  | (-)              |
| 28 <sup>f</sup>   |        |           | 0         | 92                     | 99                  |                  |
| 29                |        |           | RT        | 82                     | 71                  |                  |
| 30                |        |           | 0         | 65                     | 81                  | (-)              |
| 31 <sup>f</sup>   |        |           | 0         | 88                     | 81                  |                  |
| 32                |        |           | RT        | 85                     | 56                  |                  |
| 33                |        |           | 0         | 62                     | 80                  | (-)              |
| 34 <sup>f</sup>   |        |           | 0         | 82                     | 80                  |                  |
| 35                |        |           | RT        | 90                     | 70                  |                  |
| 36                |        |           | 0         | 70                     | 90                  | (-)              |
| 37 <sup>f</sup>   |        |           | 0         | 85                     | 90                  |                  |
| 38                |        |           | RT        | 48                     | 80                  | (-)              |
| 39                |        |           | RT        | 43                     | 80                  | (-)              |
| 40                |        |           | 40        | 87                     | --                  | --               |
| 41 <sup>h</sup>   |        |           | 40        | 26                     | 90                  | (+)              |
| 42 <sup>f,h</sup> |        |           | 40        | 42                     | 91                  | (+)              |
| 43 <sup>f,h</sup> |        |           | 40        | 30                     | 90                  | (+)              |
| 44                |        |           | 0         | 26                     | 94                  | (+)              |
| 45 <sup>i</sup>   |        |           | RT        | 53                     | 87                  | (-)              |
| 46                |        |           | 40        | 85                     | --                  | --               |
| 47                |        |           | 40        | >50 <sup>j</sup>       | --                  | --               |

<sup>a</sup> Performed in C<sub>6</sub>H<sub>5</sub>Cl using 5 mol % [Co(P6)] for 24 h under N<sub>2</sub> with 4 Å MS; alkene:TcesN<sub>3</sub> = 5.0:1.0; [alkene] = 0.25 M. <sup>b</sup> Isolated yields. <sup>c</sup> By chiral HPLC. <sup>d</sup> Sign of optical rotation. <sup>e</sup> Determined by X-ray crystal structural analysis. <sup>f</sup> Added 5 mol % Pd(OAc)<sub>2</sub> for 48 h. <sup>g</sup> Styrene:TcesN<sub>3</sub> = 1.0:1.1. <sup>h</sup> Using [Co(P5)] as catalyst in CH<sub>2</sub>Cl<sub>2</sub> for 48 h. <sup>i</sup> In CH<sub>3</sub>CO<sub>2</sub>C<sub>2</sub>H<sub>5</sub>. <sup>j</sup> Partial decomposition on silica gel.

**General Considerations.** All cross-coupling and aziridination reactions were performed under nitrogen in oven-dried glassware following standard Schlenk techniques. 4 Å molecular sieves were dried in a vacuum oven prior to use. Chlorobenzene, acetonitrile, and dichloromethane were dried over calcium hydride under nitrogen and freshly distilled before use. Toluene and tetrahydrofuran were distilled under nitrogen from sodium benzophenone ketyl prior to use. Co-Chiral Porphyrins were prepared from reported procedure<sup>1</sup>. Thin layer chromatography was performed on Merck TLC plates (silica gel 60 F254). Flash column chromatography was performed with ICN silica gel (60 Å, 230-400 mesh, 32-63 µm). <sup>1</sup>H NMR and <sup>13</sup>C NMR were recorded on a Varian Inova400 (400 MHz) instrument with chemical shifts reported relative to residual solvent. Infrared spectra were measured with a Nicolet Avatar 320 spectrometer with a Smart Miracle accessory. HPLC measurements were carried out on a Shimadzu HPLC system with a Whelk-O 1, Chiralcel OD-H, or Chiralcel OJ-H column. HRMS data was obtained on an Agilent 1100 LC/MS ESI/TOF mass spectrometer with electrospray ionization. Optical rotation was measured on a Rudolf Autopol IV Polarimeter.

**Synthesis of Trichloroethoxysulfonyl Azide.** The 2,2,2-trichloroethanol (1.91 ml, 20 mmol) was dissolved in DCM (20 mL). Pyridine (10 mL) was added in one portion at 0 °C, and the resulting solution was stirred for 15-20 minutes. Sulfuryl chloride (1.78 mL, 22 mmol in 20 mL DCM) was added dropwise over 20-30 minutes. The reaction mixture was allowed to warm up to room temperature and stirred overnight. After the reaction was complete, the flask underwent rotary evaporation until the DCM was removed. The residue was dissolved in 10 mL CH<sub>3</sub>CN and the solution was stirred at 0 °C for 15-20 minutes. Sodium azide (1.95 g, 1.5 eq) was added in one portion to the sulfuryl chloride mixture and the reaction mixture was allowed to warm up to room temperature and stirred overnight. After the reaction was complete, the flask underwent rotary evaporation until the acetonitrile was removed. The crude product was extracted from the water using ethyl acetate (3 x 50 mL). It was then washed with brine (20 mL), dried over sodium sulfate, and concentrated by rotary evaporation. The resulting oil was then purified by flash

column chromatography. The fractions containing product were collected and concentrated by rotary evaporation to afford a colorless oily liquid (4.3 g, 84%).

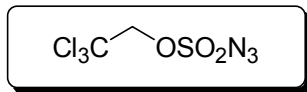

**Trichloroethoxysulfonyl Azide:** <sup>1</sup>H NMR (400 MHz, CDCl<sub>3</sub>): δ 4.74 (s, 2H). <sup>13</sup>C NMR (100 MHz, CDCl<sub>3</sub>): δ 92.3, 80.5. IR (neat, cm<sup>-1</sup>): 2964, 2146, 1415, 1192, 1087, 995, 866, 784, 724, 622.

### General Procedure for the Aziridination of Alkenes.

An oven dried Schlenk tube, that was previously evacuated and backfilled with nitrogen gas, was charged with catalyst (0.05 mmol), Pd(OAc)<sub>2</sub> (0.05 mmol), and 4Å MS (100 mg). The Schlenk tube was then evacuated and backfilled with nitrogen. The Teflon screw cap was replaced with a rubber septum and 0.5 ml of solvent was added followed by styrene (0.5 mmol) at room temperature, another portion of solvent at 0°C, then azide (0.1 mmol), and the remaining solvent (total 1 mL). The Schlenk tube was then purged with nitrogen for 1 minute and the rubber septum was replaced with the Teflon screw cap. The Schlenk tube was then placed at room temperature or 0°C for 24-48 h. Following the completion of the reaction, the reaction mixture was purified by flash chromatography. The fractions containing product were collected and concentrated by rotary evaporation to afford the compound.

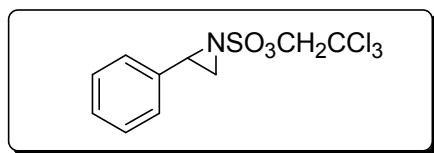

**2-Phenyl-aziridine-1-sulfonic acid 2,2,2-trichloro-ethyl ester:**<sup>2</sup> [α]<sup>20</sup><sub>D</sub> = -52.38 (*c* = 0.31, CHCl<sub>3</sub>, ee = 94%). <sup>1</sup>H NMR (400 MHz, CDCl<sub>3</sub>): δ 7.39-7.32 (m, 5H), 4.88 (d, 1H, *J* = 10.9 Hz), 4.81 (d, 1H, *J* = 10.9 Hz), 3.88 (dd, 1H, *J* = 7.2, 4.6 Hz), 3.09 (d, 1H, *J* = 7.2 Hz), 2.63 (d, 1H, *J* = 4.7 Hz). <sup>13</sup>C NMR (100 MHz, CDCl<sub>3</sub>): δ 133.8, 128.9, 128.8,

126.5, 92.8, 79.6, 42.7, 37.5. IR (neat,  $\text{cm}^{-1}$ ): 2925, 1365, 1182, 1094, 1008, 908, 880, 785, 716, 695, 622. HRMS (ESI) Calcd. for  $\text{C}_{10}\text{H}_{10}\text{Cl}_3\text{NO}_3\text{S}$ : 328.9447, Found 182.0280 ( $\text{M}^+ - \text{OCH}_2\text{CCl}_3$ ). HPLC analysis: ee = 96%. Welko-O 1 (99.5% hexanes: 0.5%-isopropanol, 1.0mL/min):  $t_{\text{minor}} = 19.0$  min,  $t_{\text{major}} = 23.4$  min.

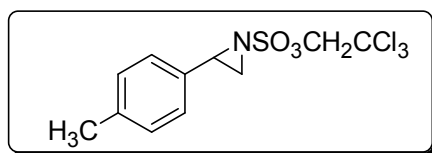

**2-*p*-Tolyl-2-aziridine-1-sulfonic acid 2,2,2-trichloro-ethyl ester:**<sup>2</sup>  $[\alpha]^{20}\text{D} = -22.10$  ( $c = 0.75$ ,  $\text{CHCl}_3$ , ee = 90%).  $^1\text{H}$  NMR (400 MHz,  $\text{CDCl}_3$ ):  $\delta$  7.16 (s, 4H), 4.86 (d, 1H,  $J = 10.8$  Hz), 4.79 (d, 1H,  $J = 10.8$  Hz), 3.84 (dd, 1H,  $J = 7.2, 4.8$  Hz), 3.06 (d, 1H,  $J = 6.8$  Hz), 2.60 (d, 1H,  $J = 4.8$  Hz), 2.34 (s, 3H).  $^{13}\text{C}$  NMR (100 MHz,  $\text{CDCl}_3$ ):  $\delta$  139.1, 130.9, 129.7, 126.7, 93.9, 79.9, 43.0, 37.6, 21.4. IR (neat,  $\text{cm}^{-1}$ ): 2924, 2852, 1366, 1182, 1086, 1007, 917, 870, 788, 718. HRMS (ESI) ( $[\text{M}+\text{H}]^+$ ) Calcd. for  $\text{C}_{11}\text{H}_{13}\text{Cl}_3\text{NO}_3\text{S}$ : 343.9682, Found 343.9690. HPLC analysis: ee = 90%. Welko-O 1 (99.5% hexanes: 0.5%-isopropanol, 1.0mL/min):  $t_{\text{minor}} = 19.1$  min,  $t_{\text{major}} = 23.8$  min.

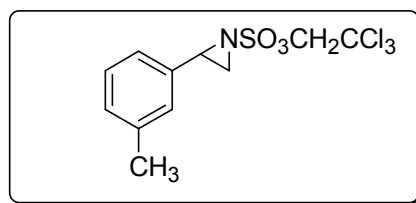

**2-*m*-Tolyl-2-aziridine-1-sulfonic acid 2,2,2-trichloro-ethyl ester:**  $[\alpha]^{20}\text{D} = -49.99$  ( $c = 0.85$ ,  $\text{CHCl}_3$ , ee = 82%).  $^1\text{H}$  NMR (400 MHz,  $\text{CDCl}_3$ ):  $\delta$  7.26 (s, 4H), 4.81 (d, 1H,  $J = 10.8$  Hz), 3.83 (dd, 1H,  $J = 7.2, 4.8$  Hz), 3.06 (d, 1H,  $J = 7.2$  Hz), 2.60 (d, 1H,  $J = 4.4$  Hz), 2.34 (s, 3H).  $^{13}\text{C}$  NMR (100 MHz,  $\text{CDCl}_3$ ):  $\delta$  138.8, 133.9, 129.9, 128.9, 127.4, 123.9, 93.1, 79.9, 43.0, 37.6, 21.6. IR (neat,  $\text{cm}^{-1}$ ): 2921, 2851, 1463, 1378, 1186, 1090, 888, 721, 618. HRMS (ESI) ( $[\text{M}+\text{H}]^+$ ) Calcd. for  $\text{C}_{11}\text{H}_{13}\text{Cl}_3\text{NO}_3\text{S}$ : 343.9682, Found

343.9694. HPLC analysis: ee = 82%. Welko-O 1 (99.5% hexanes: 0.5%-isopropanol, 1.0mL/min):  $t_{minor}$  = 18.7 min,  $t_{major}$  = 24.5 min.

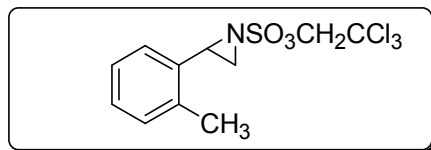

**2-*o*-Tolyl-2-aziridine-1-sulfonic acid 2,2,2-trichloro-ethyl ester:**  $[\alpha]^{20}_D = -24.81$  ( $c = 0.66$ ,  $\text{CHCl}_3$ , ee = 84%).  $^1\text{H NMR}$  (400 MHz,  $\text{CDCl}_3$ ):  $\delta$  7.24-7.27 (m, 4H), 4.90 (d, 1H,  $J = 10.8$  Hz), 4.84 (d, 1H,  $J = 10.8$  Hz), 3.99 (dd, 1H,  $J = 7.2, 4.8$  Hz), 3.08 (d, 1H,  $J = 6.8$  Hz), 2.57 (d, 1H,  $J = 4.8$  Hz), 2.44 (s, 3H).  $^{13}\text{C NMR}$  (100 MHz,  $\text{CDCl}_3$ ):  $\delta$  137.3, 132.3, 130.6, 128.9, 126.5, 125.9, 93.1, 79.9, 41.5, 36.8, 19.3. IR (neat,  $\text{cm}^{-1}$ ): 2926, 2854, 1364, 1180, 1095, 999, 921, 884, 846, 788, 723, 624. HRMS (ESI) ( $[\text{M}+\text{H}]^+$ ) Calcd. for  $\text{C}_{11}\text{H}_{13}\text{Cl}_3\text{NO}_3\text{S}$ : 343.9682, Found 343.9689. HPLC analysis: ee = 84%. Chiralcel OD-H (98% hexanes: 2%-isopropanol, 1.0mL/min):  $t_{minor}$  = 14.0 min,  $t_{major}$  = 15.3 min.

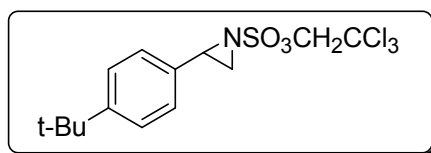

**2-(4-*tert*-Butyl-phenyl)-aziridine-1-sulfonic acid 2,2,2-trichloro-ethyl ester:**  $[\alpha]^{20}_D = -17.08$  ( $c = 1.51$ ,  $\text{CHCl}_3$ , ee = 85%).  $^1\text{H NMR}$  (400 MHz,  $\text{CDCl}_3$ ):  $\delta$  7.40 (d, 2H,  $J = 8.4$  Hz), 7.25 (d, 2H,  $J = 8.4$  Hz), 4.89 (d, 1H,  $J = 10.8$  Hz), 4.82 (d, 1H,  $J = 10.8$  Hz), 3.87 (dd, 1H,  $J = 7.2, 4.8$  Hz), 3.08 (d, 1H,  $J = 7.2$  Hz), 2.63 (d, 1H,  $J = 4.4$  Hz), 1.34 (s, 9H).  $^{13}\text{C NMR}$  (100 MHz,  $\text{CDCl}_3$ ):  $\delta$  152.4, 130.9, 126.6, 125.9, 93.1, 79.9, 42.9, 37.6, 34.9, 32.2, 31.5, 30.8. IR (neat,  $\text{cm}^{-1}$ ): 2922, 2852, 1493, 1377, 1260, 1183, 1389, 1385, 1182, 1089, 1018, 801, 725. HRMS (ESI) ( $[\text{M}+\text{H}]^+$ ) Calcd. for  $\text{C}_{14}\text{H}_{19}\text{Cl}_3\text{NO}_3\text{S}$ : 386.0152, Found 386.0159. HPLC analysis: ee = 85%. Welko-O 1 (99.5% hexanes: 0.5%-isopropanol, 1.0mL/min):  $t_{minor}$  = 15.8 min,  $t_{major}$  = 18.5 min.



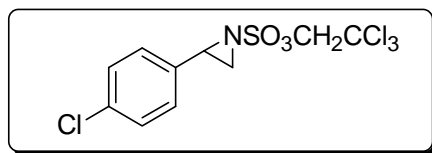

**2-(4-Chloro-phenyl)-aziridine-1-sulfonic acid 2,2,2-trichloro-ethyl ester:**<sup>2</sup>  $[\alpha]^{20}_D = -56.13$  ( $c = 0.46$ ,  $\text{CHCl}_3$ ,  $ee = 91\%$ ).  $^1\text{H NMR}$  (400 MHz,  $\text{CDCl}_3$ ):  $\delta$  7.34 (d, 2H,  $J = 8.4$  Hz), 7.23 (d, 2H,  $J = 8.4$  Hz), 4.86 (d, 1H,  $J = 10.8$  Hz), 4.80 (d, 1H,  $J = 10.8$  Hz), 3.83 (dd, 1H,  $J = 7.2, 4.8$  Hz), 3.08 (d, 1H,  $J = 7.2$  Hz), 2.57 (d, 1H,  $J = 4.8$  Hz).  $^{13}\text{C NMR}$  (100 MHz,  $\text{CDCl}_3$ ):  $\delta$  135.1, 132.6, 129.3, 128.1, 92.9, 79.9, 42.3, 37.8. IR (neat,  $\text{cm}^{-1}$ ): 2922, 2851, 1366, 1182, 1085, 1007, 915, 868, 792, 716. HRMS (ESI) ( $[\text{M}]^+$ ) Calcd. for  $\text{C}_{10}\text{H}_9\text{Cl}_4\text{NO}_3\text{S}$ : 362.9057, Found 362.9077. HPLC analysis:  $ee = 91\%$ . Welko-O 1 (99.5% hexanes: 0.5%-isopropanol, 1.0mL/min):  $t_{\text{minor}} = 20.4$  min,  $t_{\text{major}} = 25.8$  min.

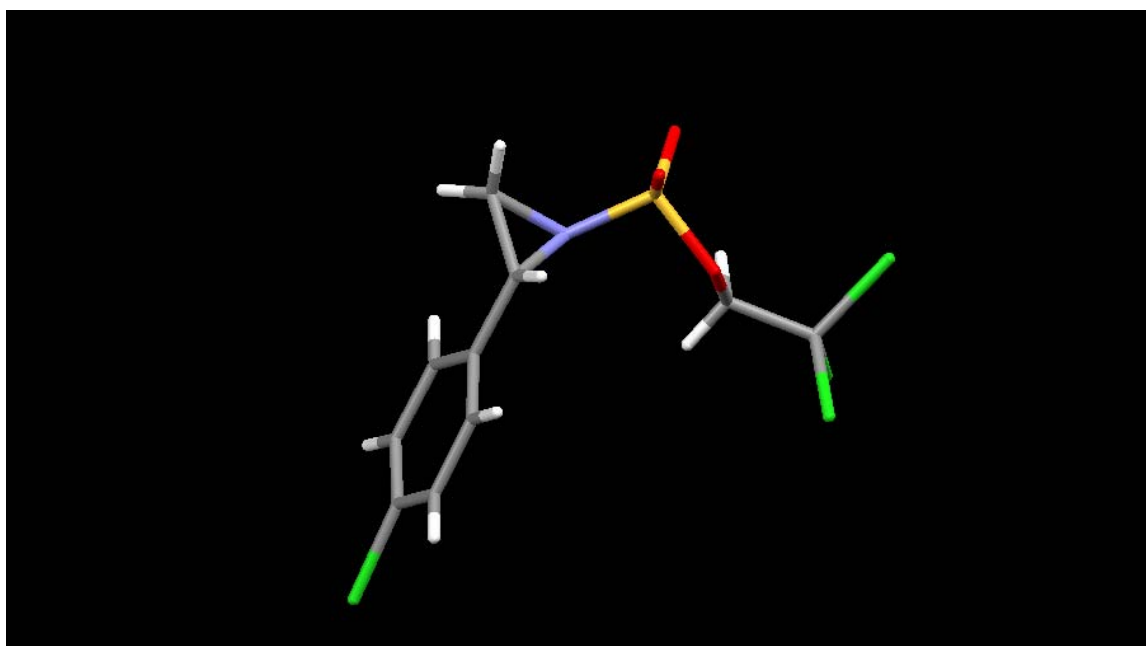

The X-ray intensities were measured using Bruker-AXS SMART APEX/CCD diffractometer ( $\text{CuK}\alpha$ ,  $\lambda = 0.71073$  Å). Indexing was performed using SMART v5.625. Frames were integrated with SaintPlus 6.01 software package. Absorption correction was performed by multi-scan method implemented in SADABS. The structure was solved

using SHELXS-97 and refined using SHELXL-97 contained in SHELXTL v6.10 and WinGX v1.70.01 program packages. All non-hydrogen atoms were refined anisotropically. Absolute configuration (and absolute structure) was established by anomalous-dispersion effects in diffraction measurements on the crystal. Crystal data and refinement conditions are shown in Table 1.

**Table 1. Crystal data and structure refinement for (4-Chloro-phenyl)-aziridine-1-sulfonic acid 2,2,2-trichloro-ethyl ester**

|                                 |                                                                   |                  |
|---------------------------------|-------------------------------------------------------------------|------------------|
| Empirical formula               | C <sub>10</sub> H <sub>9</sub> Cl <sub>4</sub> N O <sub>3</sub> S |                  |
| Formula weight                  | 365.04                                                            |                  |
| Temperature                     | 100 K                                                             |                  |
| Wavelength                      | 1.54178 Å                                                         |                  |
| Crystal system                  | Monoclinic                                                        |                  |
| Space group                     | P2(1)                                                             |                  |
| Unit cell dimensions            | a = 10.4908(6) Å                                                  | α = 90°.         |
|                                 | b = 6.0700(4) Å                                                   | β = 104.370(3)°. |
|                                 | c = 12.0008(7) Å                                                  | γ = 90°.         |
| Volume                          | 740.29(8) Å <sup>3</sup>                                          |                  |
| Z                               | 2                                                                 |                  |
| Density (calculated)            | 1.638 Mg/m <sup>3</sup>                                           |                  |
| Absorption coefficient          | 8.624 mm <sup>-1</sup>                                            |                  |
| F(000)                          | 368                                                               |                  |
| Crystal size                    | 0.40 x 0.20 x 0.10 mm <sup>3</sup>                                |                  |
| Theta range for data collection | 3.80 to 68.13°.                                                   |                  |
| Index ranges                    | -12 ≤ h ≤ 12, -7 ≤ k ≤ 6, -14 ≤ l ≤ 13                            |                  |
| Reflections collected           | 6397                                                              |                  |
| Independent reflections         | 2367 [R(int) = 0.0384]                                            |                  |
| Completeness to theta = 68.13°  | 96.6 %                                                            |                  |
| Absorption correction           | Semi-empirical from equivalents                                   |                  |
| Max. and min. transmission      | 0.4793 and 0.1299                                                 |                  |
| Refinement method               | Full-matrix least-squares on F <sub>2</sub>                       |                  |

|                                   |                                    |
|-----------------------------------|------------------------------------|
| Data / restraints / parameters    | 2367 / 1 / 172                     |
| Goodness-of-fit on F <sub>2</sub> | 1.037                              |
| Final R indices [I>2sigma(I)]     | R1 = 0.0347, wR2 = 0.0831          |
| R indices (all data)              | R1 = 0.0376, wR2 = 0.0851          |
| Absolute structure parameter      | 0.04(2)                            |
| Largest diff. peak and hole       | 0.275 and -0.284 e.Å <sup>-3</sup> |

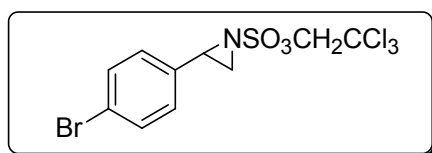

**2-(4-Bromo-phenyl)-aziridine-1-sulfonic acid 2,2,2-trichloro-ethyl ester:**  $[\alpha]^{20}_D = -51.64$  ( $c = 0.57$ ,  $\text{CHCl}_3$ ,  $ee = 91\%$ ).  $^1\text{H NMR}$  (400 MHz,  $\text{CDCl}_3$ ):  $\delta$  7.49 (d, 2H,  $J = 8.4$  Hz), 7.17 (d, 2H,  $J = 8.4$  Hz), 4.86 (d, 1H,  $J = 11.2$  Hz), 4.80 (d, 1H,  $J = 11.2$  Hz), 3.82 (dd, 1H,  $J = 7.2, 4.8$  Hz), 3.08 (d, 1H,  $J = 7.2$  Hz), 2.57 (d, 1H,  $J = 4.4$  Hz).  $^{13}\text{C NMR}$  (100 MHz,  $\text{CDCl}_3$ ):  $\delta$  133.2, 132.2, 128.4, 123.2, 92.9, 79.9, 42.3, 37.7. IR (neat,  $\text{cm}^{-1}$ ): 2926, 2853, 1365, 1179, 1090, 1008, 925, 889, 862, 789, 723. HRMS (ESI) ( $[\text{M}]^+$ ) Calcd. for  $\text{C}_{10}\text{H}_9\text{BrCl}_3\text{NO}_3\text{S}$ : 406.8552, Found 406.8580. HPLC analysis:  $ee = 91\%$ . Welko-O 1 (99.5% hexanes: 0.5%-isopropanol, 1.0mL/min):  $t_{\text{minor}} = 22.6$  min,  $t_{\text{major}} = 28.7$  min.

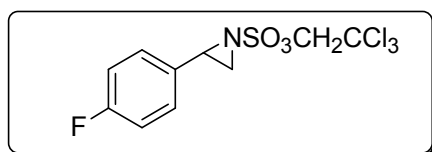

**2-(4-Fluoro-phenyl)-aziridine-1-sulfonic acid 2,2,2-trichloro-ethyl ester:**  $[\alpha]^{20}_D = -46.12$  ( $c = 0.66$ ,  $\text{CHCl}_3$ ,  $ee = 90\%$ ).  $^1\text{H NMR}$  (400 MHz,  $\text{CDCl}_3$ ):  $\delta$  7.28 (d, 2H,  $J = 8.8$  Hz), 7.06 (d, 2H,  $J = 8.4$  Hz), 4.86 (d, 1H,  $J = 10.8$  Hz), 4.80 (d, 1H,  $J = 10.8$  Hz), 3.85 (dd, 1H,  $J = 7.2, 4.4$  Hz), 3.07 (d, 1H,  $J = 7.2$  Hz), 2.57 (d, 1H,  $J = 4.8$  Hz).  $^{13}\text{C NMR}$  (100 MHz,  $\text{CDCl}_3$ ):  $\delta$  164.5, 161.9, 129.8, 128.6, 128.5, 116.2, 115.9, 93.0, 79.9,

42.3, 37.7. IR (neat,  $\text{cm}^{-1}$ ): 2925, 2854, 1516, 1367, 1182, 1086, 1008, 975, 919, 871, 837, 793, 717. HRMS (ESI) ( $[\text{M}]^+$ ) Calcd. for  $\text{C}_{10}\text{H}_9\text{Cl}_3\text{FNO}_3\text{S}$ : 346.9353, Found 346.9370. HPLC analysis: ee = 90%. Welko-O 1 (99.5% hexanes: 0.5%-isopropanol, 1.0mL/min):  $t_{\text{minor}} = 17.4$  min,  $t_{\text{major}} = 21.0$  min.

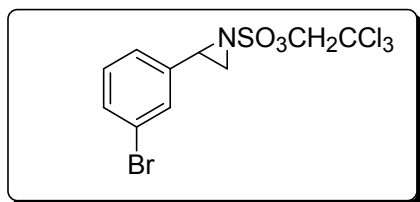

**2-(3-Bromo-phenyl)-aziridine-1-sulfonic acid 2,2,2-trichloro-ethyl ester:**  $[\alpha]^{20}\text{D} = -54.87$  ( $c = 0.65$ ,  $\text{CHCl}_3$ , ee = 88%).  $^1\text{H}$  NMR (400 MHz,  $\text{CDCl}_3$ ):  $\delta$  7.43-7.37 (m, 2H), 7.19-7.17 (m, 2H), 4.82 (d, 1H,  $J = 10.8$  Hz), 4.66 (d, 1H,  $J = 10.8$  Hz), 3.77 (dd, 1H,  $J = 7.2, 4.4$  Hz), 3.02 (d, 1H,  $J = 7.2$  Hz), 2.52 (d, 1H,  $J = 4.8$  Hz).  $^{13}\text{C}$  NMR (100 MHz,  $\text{CDCl}_3$ ):  $\delta$  136.4, 132.3, 130.6, 129.7, 125.6, 123.1, 92.9, 79.9, 41.9, 37.7. IR (neat,  $\text{cm}^{-1}$ ): 2925, 2853, 1464, 1369, 1181, 1088, 1009, 925, 854, 782, 725, 684. HRMS (ESI) ( $[\text{M}]^+$ ) Calcd. for  $\text{C}_{10}\text{H}_9\text{BrCl}_3\text{NO}_3\text{S}$ : 407.8641, Found 407.8652. HPLC analysis: ee = 88%. Welko-O 1 (99.5% hexanes: 0.5%-isopropanol, 1.0mL/min):  $t_{\text{minor}} = 20.2$  min,  $t_{\text{major}} = 25.2$  min.

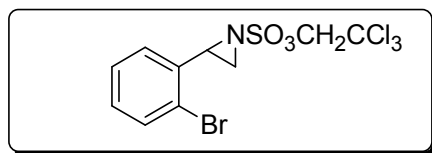

**2-(2-Bromo-phenyl)-aziridine-1-sulfonic acid 2,2,2-trichloro-ethyl ester:**<sup>2</sup>  $[\alpha]^{20}\text{D} = -49.70$  ( $c = 0.56$ ,  $\text{CHCl}_3$ , ee = 99%).  $^1\text{H}$  NMR (400 MHz,  $\text{CDCl}_3$ ):  $\delta$  7.52 (d, 1H,  $J = 8.0$  Hz), 7.28-7.12 (m, 3H), 4.85 (d, 1H,  $J = 10.8$  Hz), 4.80 (d, 1H,  $J = 10.8$  Hz), 4.08 (dd, 1H,  $J = 7.2, 4.8$  Hz), 3.06 (d, 1H,  $J = 7.2$  Hz), 2.43 (d, 1H,  $J = 4.4$  Hz).  $^{13}\text{C}$  NMR (100 MHz,  $\text{CDCl}_3$ ):  $\delta$  133.9, 132.9, 130.3, 127.9, 127.8, 123.6, 93.1, 79.9, 43.0, 37.6. IR (neat,  $\text{cm}^{-1}$ ): 2923, 2854, 1464, 1372, 1260, 1183, 1096, 1002, 917, 788, 755, 724, 623. HRMS

(ESI) ( $[M]^+$ ) Calcd. for  $C_{10}H_9BrCl_3NO_3S$ : 406.8552, Found 406.8535. HPLC analysis: ee = 99%. Chiralcel OJ-H (95% hexanes: 5%-isopropanol, 1mL/min):  $t_{major}$  = 13.3 min,  $t_{minor}$  = 16.4 min.

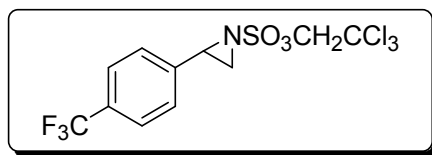

**2-(4-Trifluoromethyl-phenyl)-aziridine-1-sulfonic acid 2,2,2-trichloro-ethyl ester:**  
 $[\alpha]^{20}_D = -42.07$  ( $c = 0.80$ ,  $CHCl_3$ , ee = 81%).  $^1H$  NMR (400 MHz,  $CDCl_3$ ):  $\delta$  7.63 (d, 2H,  $J = 8.0$  Hz), 7.40 (d, 2H,  $J = 8.0$  Hz), 4.88 (d, 1H,  $J = 10.8$  Hz), 4.82 (d, 1H,  $J = 10.8$  Hz), 3.91 (dd, 1H,  $J = 7.2, 4.4$  Hz), 3.12 (d, 1H,  $J = 7.2$  Hz), 2.59 (d, 1H,  $J = 4.4$  Hz).  $^{13}C$  NMR (100 MHz,  $CDCl_3$ ):  $\delta$  138.2, 131.5, 131.3, 127.2, 126.1, 126.0, 125.4, 92.9, 79.9, 42.0, 37.9. IR (neat,  $cm^{-1}$ ): 2925, 2854, 1382, 1324, 1182, 1121, 1068, 1009, 920, 850, 783, 724. HRMS (ESI) ( $[M+H]^+$ ) Calcd. for  $C_{11}H_{10}Cl_3F_3NO_3S$ : 397.9395, Found 397.9390. HPLC analysis: ee = 81%. Welko-O 1 (99.5% hexanes: 0.5%-isopropanol, 1.0mL/min):  $t_{minor}$  = 16.4 min,  $t_{major}$  = 19.5 min.

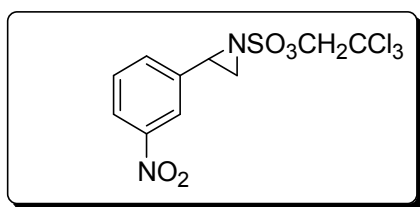

**2-(3-Nitro-phenyl)-aziridine-1-sulfonic acid 2,2,2-trichloro-ethyl ester:<sup>2</sup>**  $[\alpha]^{20}_D = -101.66$  ( $c = 0.32$ ,  $CHCl_3$ , ee = 80%).  $^1H$  NMR (400 MHz,  $CDCl_3$ ):  $\delta$  8.22 (d, 1H,  $J = 8.0$  Hz), 8.15 (s, 1H), 7.66 (d, 1H,  $J = 8.0$  Hz), 7.58 (t, 1H,  $J = 8.0$  Hz), 4.90 (d, 1H,  $J = 10.8$  Hz), 4.84 (d, 1H,  $J = 10.8$  Hz), 3.95 (dd, 1H,  $J = 7.2, 4.4$  Hz), 3.15 (d, 1H,  $J = 7.2$  Hz), 2.63 (d, 1H,  $J = 4.8$  Hz).  $^{13}C$  NMR (100 MHz,  $CDCl_3$ ):  $\delta$  148.8, 136.5, 122.9, 130.2, 124.1, 121.7, 92.9, 80.0, 41.6, 37.9. IR (neat,  $cm^{-1}$ ): 2922, 2853, 1534, 1368, 1345, 1182, 1010, 939, 874, 787, 720, 648. calcd for  $C_{10}H_9Cl_3N_2O_5S$  373.9298. Found 227.0130

(M<sup>+</sup>-OCH<sub>2</sub>CCl<sub>3</sub>). HPLC analysis: ee = 80%. Welko-O 1 (98% hexanes: 2%-isopropanol, 1.0mL/min):  $t_{minor}$  = 29.8 min,  $t_{major}$  = 32.2 min.

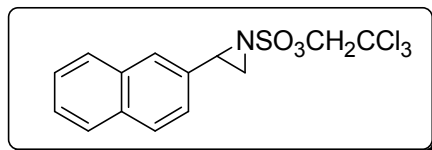

**2-Naphthalene-2yl-aziridine-1-sulfonic acid 2,2,2-trichloro-ethyl ester:**  $[\alpha]^{20}_D = -86.69$  ( $c = 0.27$ , CHCl<sub>3</sub>, ee = 90%). <sup>1</sup>H NMR (400 MHz, CDCl<sub>3</sub>):  $\delta$  7.85-7.81 (m, 4H), 7.52-7.50 (m, 2H), 7.33-7.31 (m, 1H), 4.90 (d, 1H,  $J = 10.8$  Hz), 4.83 (d, 1H,  $J = 10.8$  Hz), 4.04 (dd, 1H,  $J = 7.2, 4.4$  Hz), 3.16 (d, 1H,  $J = 7.2$  Hz), 2.72 (d, 1H,  $J = 4.8$  Hz). <sup>13</sup>C NMR (100 MHz, CDCl<sub>3</sub>):  $\delta$  133.6, 122.2, 131.4, 129.0, 128.1, 128.0, 126.9, 126.9, 127.8, 123.5, 93.1, 79.9, 43.3, 37.7. IR (neat, cm<sup>-1</sup>): 2922, 2852, 1364, 1260, 1180, 1090, 1003, 861, 788, 721, 643. HRMS (ESI) ( $[M+H]^+$ ) Calcd. for C<sub>14</sub>H<sub>13</sub>Cl<sub>3</sub>NO<sub>3</sub>S: 379.9682, Found 379.9694. HPLC analysis: ee = 90%. Welko-O 1 (98% hexanes: 2%-isopropanol, 1.0mL/min):  $t_{minor}$  = 19.6 min,  $t_{major}$  = 28.1 min.

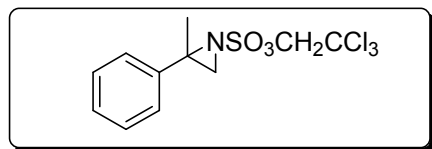

**2-Phenyl-1-Methyl-aziridine-1-sulfonic acid 2,2,2-trichloro-ethyl ester:**  $[\alpha]^{20}_D = -1.68$  ( $c = 0.26$ , CHCl<sub>3</sub>, ee = 80%). <sup>1</sup>H NMR (400 MHz, CDCl<sub>3</sub>):  $\delta$  7.38-7.19 (m, 5H), 4.81 (s, 2H), 3.00 (s, 1H), 2.77 (s, 1H), 1.95 (s, 3H). IR (neat, cm<sup>-1</sup>): 2922, 1365, 1182, 1094, 1008, 908, 880, 785, 716, 695, 622. HRMS (ESI) ( $[M+H]^+$ ) Calcd. for C<sub>11</sub>H<sub>13</sub>Cl<sub>3</sub>NO<sub>3</sub>S: 343.9682, Found 343.9630. HPLC analysis: ee = 80%. Chiralcel OD-H (98.5% hexanes: 1.5%-isopropanol, 0.8mL/min):  $t_{minor}$  = 16.2 min,  $t_{major}$  = 17.3 min.

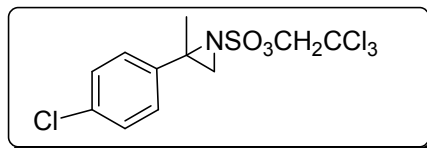

**4-Chloro-2-Phenyl-1-Methyl-aziridine-1-sulfonic acid 2,2,2-trichloro-ethyl ester:**  
[ $\alpha$ ]<sup>20</sup><sub>D</sub> = -1.92 (*c* = 0.16, CHCl<sub>3</sub>, ee = 80%). <sup>1</sup>H NMR (400 MHz, CDCl<sub>3</sub>):  $\delta$  7.29 (s, 4H), 4.77 (s, 2H), 2.97 (s, 1H), 2.71 (s, 1H), 1.89 (s, 3H). <sup>13</sup>C NMR (100 MHz, CDCl<sub>3</sub>):  $\delta$  138.22, 134.54, 129.94, 129.11, 128.13, 93.26, 79.71, 50.74, 43.42, 20.82. IR (neat, cm<sup>-1</sup>): 2922, 1365, 1182, 1094, 1008, 908, 880, 785, 716, 695, 622. HRMS (ESI) ([M+H]<sup>+</sup>): Calcd. for C<sub>11</sub>H<sub>12</sub>Cl<sub>4</sub>NO<sub>3</sub>S: 377.9293, Found 377.9278. HPLC analysis: ee = 80%. Chiralcel OD-H (98.5% hexanes: 1.5%-isopropanol, 0.8mL/min): *t*<sub>minor</sub> = 15.4 min, *t*<sub>major</sub> = 19.6 min.

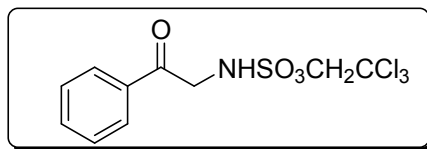

<sup>1</sup>H NMR (400 MHz, CDCl<sub>3</sub>):  $\delta$  7.94 (d, 2H, *J* = 7.28 Hz), 7.66 (t, 1H, *J* = 7.2 Hz), 7.51 (t, 2H, *J* = 7.6 Hz), 5.94 (bs, 1H), 4.70 (d, 1H, *J* = 4.0 Hz), 4.65 (s, 2H), 3.16 (d, 1H, *J* = 7.2 Hz), 2.72 (d, 1H, *J* = 4.8 Hz). <sup>13</sup>C NMR (100 MHz, CDCl<sub>3</sub>):  $\delta$  192.27, 135.05, 133.66, 129.39, 128.24, 93.49, 78.61, 49.47. IR (neat, cm<sup>-1</sup>): 3280, 2958, 2922, 2852, 1686, 1448, 1409, 1371, 1313, 1234, 1178, 1079, 1014, 837, 747, 717, 620. HRMS (ESI) ([M+H]<sup>+</sup>): Calcd. for C<sub>10</sub>H<sub>11</sub>Cl<sub>3</sub>NO<sub>4</sub>S: 345.9679, Found 345.9694.

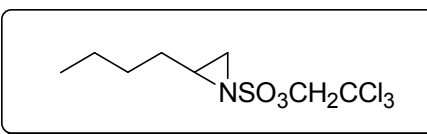

**2-Butyl-aziridine-1-sulfonic acid 2,2,2-trichloro-ethyl ester<sup>3</sup>:** [ $\alpha$ ]<sup>20</sup><sub>D</sub> = +35.09 (*c* = 0.12, CHCl<sub>3</sub>, ee = 91%). <sup>1</sup>H NMR (400 MHz, CDCl<sub>3</sub>):  $\delta$  4.90 (d, 1H, *J* = 10.8 Hz), 4.83 (d, 1H,

$J = 10.8$  Hz), 2.87 (m, 1H), 2.72 (d, 1H,  $J = 7.2$  Hz), 2.25 (d, 1H,  $J = 4.8$  Hz), 1.62-1.33 (m, 6H), 0.92 (t, 3H).  $^{13}\text{C}$  NMR (100 MHz,  $\text{CDCl}_3$ ):  $\delta$  93.0, 79.6, 42.6, 35.7, 31.0, 28.8, 22.4, 14.2. IR (neat,  $\text{cm}^{-1}$ ): 2958, 2852, 1364, 1260, 1180, 1090, 1013, 861, 788, 721, 643. HRMS (ESI) ( $[\text{M}]^+$ ) Calcd. for  $\text{C}_4\text{H}_{14}\text{Cl}_3\text{NO}_3\text{S}$ : 308.9760, Found 308.9786. HPLC analysis: ee = 91%. Welko-O 1 (99% hexanes: 1%-isopropanol, 1.0mL/min):  $t_{\text{major}} = 8.2$  min,  $t_{\text{minor}} = 9.6$  min.

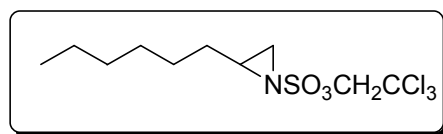

**2-Hexyl-aziridine-1-sulfonic acid 2,2,2-trichloroethyl ester**<sup>3</sup>:  $[\alpha]^{20}\text{D} = +45.09$  ( $c = 0.10$ ,  $\text{CHCl}_3$ , ee = 90%).  $^1\text{H}$  NMR (400 MHz,  $\text{CDCl}_3$ ):  $\delta$  4.91 (d, 1H,  $J = 10.8$  Hz), 4.84 (d, 1H,  $J = 10.8$  Hz), 2.89 (m, 1H), 2.74 (d, 1H,  $J = 7.2$  Hz), 2.26 (d, 1H,  $J = 4.8$  Hz), 1.65-1.31 (m, 10H), 0.91 (t, 3H).  $^{13}\text{C}$  NMR (100 MHz,  $\text{CDCl}_3$ ):  $\delta$  93.0, 79.6, 42.6, 35.7, 31.0, 28.8, 22.4, 14.2. IR (neat,  $\text{cm}^{-1}$ ): 2958, 2852, 1364, 1260, 1180, 1090, 1013, 861, 788, 721, 643. HRMS (ESI) ( $[\text{M}+\text{H}]^+$ ) Calcd. for  $\text{C}_{10}\text{H}_{19}\text{Cl}_3\text{NO}_3\text{S}$ : 338.0152, Found 338.0140. HPLC analysis: ee = 91%. Welko-O 1 (99% hexanes: 1%-isopropanol, 1.0mL/min):  $t_{\text{major}} = 8.2$  min,  $t_{\text{minor}} = 9.6$  min.

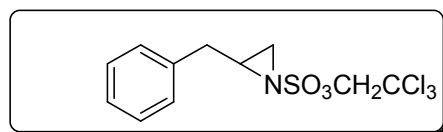

$[\alpha]^{20}\text{D} = +56.21$  ( $c = 0.16$ ,  $\text{CHCl}_3$ , ee = 94%).  $^1\text{H}$  NMR (400 MHz,  $\text{CDCl}_3$ ):  $\delta$  7.56-7.22 (m, 5H), 4.67 (d, 1H,  $J = 10.8$  Hz), 4.54 (d, 1H,  $J = 10.8$  Hz), 3.15-3.09 (m, 1H), 2.96-2.84 (m, 1H), 2.77 (d, 1H,  $J = 7.2$  Hz), 2.33 (d, 1H,  $J = 4.8$  Hz).  $^{13}\text{C}$  NMR (100 MHz,  $\text{CDCl}_3$ ):  $\delta$  136.1, 129.06, 129.01, 127.48, 92.6, 79.62, 42.55, 37.38, 35.23. IR (neat,  $\text{cm}^{-1}$ ): 2958, 2852, 1364, 1260, 1180, 1090, 1013, 861, 788, 721, 643. HRMS (ESI) ( $[\text{M}+\text{H}]^+$ ) Calcd. for  $\text{C}_{11}\text{H}_{13}\text{Cl}_3\text{NO}_3\text{S}$ : 342.9603, Found 342.9615. HPLC analysis: ee =



94%. Chiralcel OJ-H (95% hexanes: 5%-isopropanol, 0.8 mL/min):  $t_{minor} = 34.6$  min,  $t_{minor} = 42.6$  min.

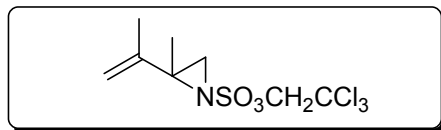

$[\alpha]^{20}_D = -6.03$  ( $c = 0.16$ , CHCl<sub>3</sub>, ee = 87%). <sup>1</sup>H NMR (400 MHz, CDCl<sub>3</sub>): 5.04 (s, 1H), 4.98 (s, 1H), 4.78 (s, 2H), 2.79 (s, 1H), 2.63 (s, 1H), 1.80 (s, 3H), 1.73 (s, 3H). <sup>13</sup>C NMR (100 MHz, CDCl<sub>3</sub>):  $\delta$  143.3, 114.5, 93.1, 79.6, 52.8, 42.8, 19.1, 18.1. IR (neat, cm<sup>-1</sup>): 2940, 2852, 1364, 1260, 1180, 1090, 1013, 861, 788, 721, 643. HRMS (ESI) ([M+H]<sup>+</sup>) Calcd. for C<sub>8</sub>H<sub>13</sub>Cl<sub>3</sub>NO<sub>3</sub>S: 307.9682, Found 307.9652. HPLC analysis: ee = 87%. Welko-O 1 (99.5% hexanes: 0.5%-isopropanol, 1.0mL/min):  $t_{minor} = 9.5$  min,  $t_{major} = 10.4$  min.

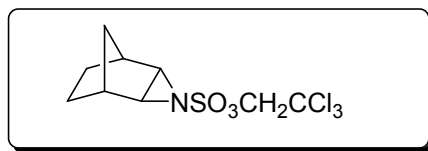

<sup>1</sup>H NMR (400 MHz, CDCl<sub>3</sub>):  $\delta$  4.75 (s, 2H), 3.03 (s, 2H), 2.54 (s, 2H), 1.53 (d, 2H,  $J = 7.2$  Hz), 1.46 (d, 1H,  $J = 10.0$  Hz), 1.28 (m, 2H), 0.84 (d, 2H,  $J = 10.0$  Hz). <sup>13</sup>C NMR (100 MHz, CDCl<sub>3</sub>):  $\delta$  93.40, 79.60, 43.87, 36.04, 28.28, 28.24, 25.52. IR (neat, cm<sup>-1</sup>): 2985, 2880, 1363, 1288, 1175, 1092, 1012, 979, 917, 870, 789, 723, 621. HRMS (ESI) ([M+H]<sup>+</sup>) Calcd. for C<sub>9</sub>H<sub>13</sub>Cl<sub>3</sub>NO<sub>3</sub>S: 319.9682, Found 319.9689.

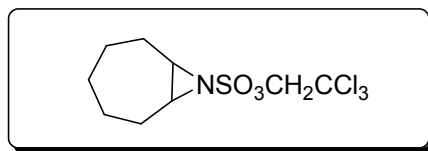

**N-(2, 2, 2-Trichloroethoxysulfonyl)-8-aza-bicyclo[5,1,0]octane:**<sup>3</sup> <sup>1</sup>H NMR (400 MHz, CDCl<sub>3</sub>):  $\delta$  4.80 (s, 2H), 3.10 (m, 2H), 2.06-1.88 (m, 4H), 1.65-1.47 (m, 5H), 1.23 (m, 1H). <sup>13</sup>C NMR (100 MHz, CDCl<sub>3</sub>):  $\delta$  93.31, 79.56, 46.64, 31.06, 28.14, 25.40. IR (neat,

$\text{cm}^{-1}$ ): 2960, 2879, 1365, 1270, 1180, 1081, 1030, 869, 779, 709, 627. HRMS (ESI) ( $[\text{M}+\text{H}]^+$ ) Calcd. for  $\text{C}_9\text{H}_{15}\text{Cl}_3\text{NO}_3\text{S}$ : 321.9839, Found 321.9850.

### References:

- 1) a) Chen, Y.; Fields, K. B.; Zhang, X. P. *J. Am. Chem. Soc.* **2004**, *126*, 14718.  
b) Zhu, S.; Ruppel, J. V.; Lu, H.; Wojtas, L.; Zhang, X. P. *J. Am. Chem. Soc.* **2008**, *130*, 5042.
- 2) Guthikonda, K.; Du Bois, J. *J. Am. Chem. Soc.* **2002**, *124*, 13672.
- 3) Xu, Q.; Appella, D. H. *Org. Lett.* **2008**, *10*, 1497.

## Supporting Information

Highly Asymmetric Cobalt-Catalyzed Aziridination of Alkenes with Trichloroethoxysulfonyl Azide (TcesN<sub>3</sub>)

Velusamy Subbarayan, Joshua V. Ruppel, Shifa Zhu,  
Jason A. Permon and X. Peter Zhang  
Department of Chemistry, University of South Florida,  
Tampa, Florida 33620-5250

## **Table of Contents**

|                                                                                   |                 |
|-----------------------------------------------------------------------------------|-----------------|
| <u>NMR and IR spectral of Trichloroethoxy sulfonyl azide</u>                      | <u>SS-4-6</u>   |
| <u>NMR spectral and HPLC data of 2-Phenyl-aziridine-1-sulfonic acid</u>           | <u>SS-7-10</u>  |
| <u>2,2,2-trichloro-ethylester</u>                                                 |                 |
| <u>NMR spectral and HPLC data of 2-<i>p</i>-Tolyl-2-aziridine-1-sulfonic acid</u> |                 |
| <u>2,2,2-trichloro-ethyl ester</u>                                                | <u>SS-11-14</u> |
| <u>NMR spectral and HPLC data of 3-<i>m</i>-Tolyl-2-aziridine-1-sulfonic acid</u> |                 |
| <u>2,2,2-trichloro-ethyl ester</u>                                                | <u>SS-15-18</u> |
| <u>NMR spectral and HPLC data of 3-<i>o</i>-Tolyl-2-aziridine-1-sulfonic acid</u> |                 |
| <u>2,2,2-trichloro-ethyl ester</u>                                                | <u>SS-19-22</u> |
| <u>NMR spectral and HPLC data of 2-(4-<i>tert</i>-Butyl-phenyl)-aziridine</u>     |                 |
| <u>-1-sulfonic acid 2,2,2-trichloro-ethyl ester</u>                               | <u>SS-23-26</u> |
| <u>NMR spectral HPLC and Crystal structure data of 2-(4-Chloro-phenyl)</u>        |                 |
| <u>-aziridine-1-sulfonic acid 2,2,2-trichloro-ethyl ester</u>                     | <u>SS-27-31</u> |
| <u>NMR spectral and HPLC data of 2-(4-Bromo-phenyl)-aziridine</u>                 |                 |
| <u>-1-sulfonic acid 2,2,2-trichloro-ethyl ester</u>                               | <u>SS-32-35</u> |
| <u>NMR spectral and HPLC data of 2-(4-Fluoro-phenyl)-aziridine</u>                |                 |
| <u>-1-sulfonic acid 2,2,2-trichloro-ethyl ester</u>                               | <u>SS-36-39</u> |
| <u>NMR spectral and HPLC data of 2-(3-Bromo-phenyl)-aziridine</u>                 |                 |
| <u>-1-sulfonic acid 2,2,2-trichloro-ethyl ester</u>                               | <u>SS-40-43</u> |
| <u>NMR spectral and HPLC data of 2-(2-Bromo-phenyl)-aziridine</u>                 |                 |
| <u>-1-sulfonic acid 2,2,2-trichloro-ethyl ester</u>                               | <u>SS-44-47</u> |
| <u>NMR spectral and HPLC data of 2-(4-Trifluoromethyl-phenyl)</u>                 |                 |
| <u>-aziridine-1-sulfonic acid 2,2,2-trichloro-ethyl ester</u>                     | <u>SS-48-51</u> |
| <u>NMR spectral and HPLC data of 2-(3-Nitro-phenyl)-aziridine</u>                 |                 |
| <u>-1-sulfonic acid 2,2,2-trichloro-ethyl ester</u>                               | <u>SS-52-55</u> |
| <u>NMR spectral and HPLC data of 2-Napthalene-2-yl-aziridine</u>                  |                 |
| <u>-1-sulfonic acid 2,2,2-trichloro-ethyl ester</u>                               | <u>SS-56-59</u> |
| <u>NMR spectral and HPLC data of 1-Methyl-2-Phenyl-aziridine</u>                  |                 |

|                                                                                |                 |
|--------------------------------------------------------------------------------|-----------------|
| <u>-1-sulfonic acid 2,2,2-trichloro-ethylester</u>                             | <u>SS-60-62</u> |
| <u>NMR spectral and HPLC data of 1-Methyl-2-Phenyl 4-Chloro-aziridine</u>      |                 |
| <u>-1-sulfonic acid 2,2,2-trichloro-ethylester</u>                             | <u>SS-63-66</u> |
| <u>NMR spectral of 2-Amino Sulfonic acid trichloro-1-phenyl</u>                |                 |
| <u>ethanone</u>                                                                | <u>SS-67-68</u> |
| <u>HPLC data of 2-Butyl-aziridine-1-sulfonic acid</u>                          |                 |
| <u>2,2,2-trichloro-ethyl ester</u>                                             | <u>SS-69-70</u> |
| <u>HPLC data of 2-hexyl-aziridine-1-sulfonic acid</u>                          |                 |
| <u>2,2,2-trichloro-ethyl ester</u>                                             | <u>SS-71-72</u> |
| <u>NMR spectral and HPLC data of compound derived from</u>                     |                 |
| <u>Allyl Benzene form corresponding aziridine-1-sulfonic acid</u>              | <u>SS-73-75</u> |
| <u>NMR spectral and HPLC data of 2,3-Dimethyl 1-butene aziridine-1-</u>        |                 |
| <u>sulfonic acid 2,2,2-trichloro-ethyl ester</u>                               | <u>SS-76-79</u> |
| <u>NMR spectral of 2-Norbornenyl sulfonic acid 2,2,2-trichloro-ethyl ester</u> | <u>SS-80-81</u> |
| <u>Recyclability HPLC data of 2-(2-Bromo-phenyl)-aziridine</u>                 |                 |
| <u>-1-sulfonic acid 2,2,2-trichloro-ethyl ester</u>                            | <u>SS-83-84</u> |
| <u>UV-Vis Spectra of Recycled [Co(2,6-diMeOZhuPhyrin)]</u>                     | <u>SS-85</u>    |

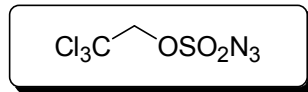

Trichloroethoxysulfonyl Azide (TcesN<sub>3</sub>)

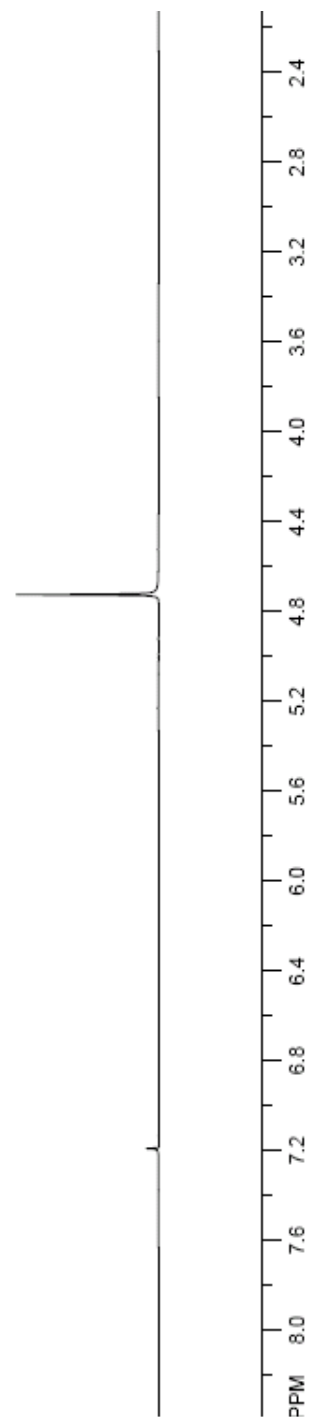

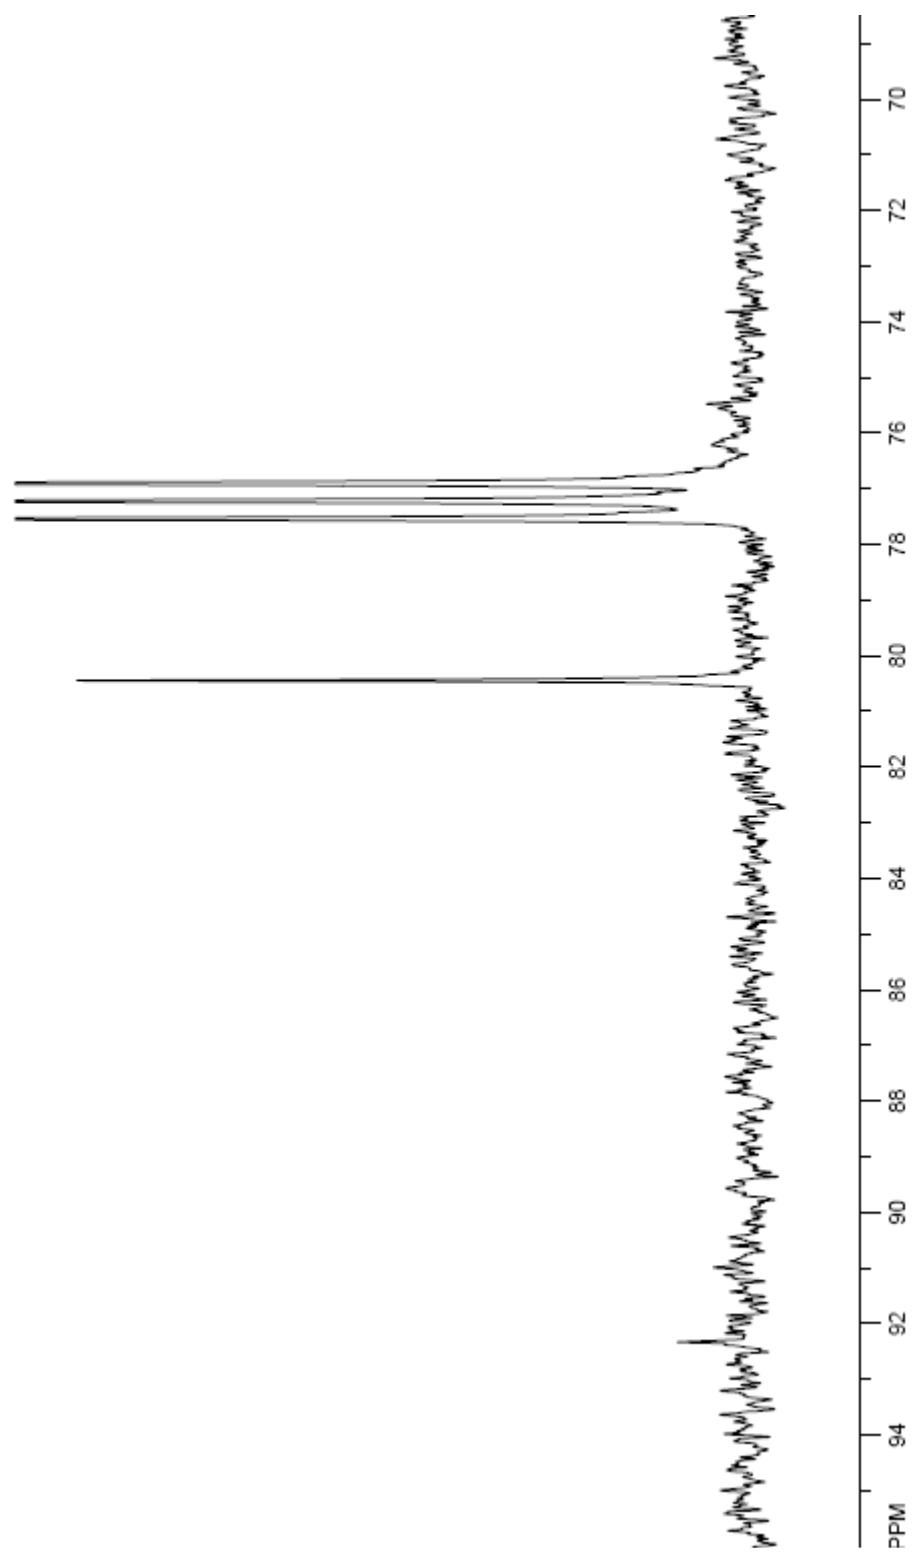

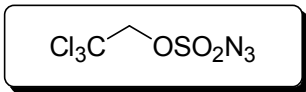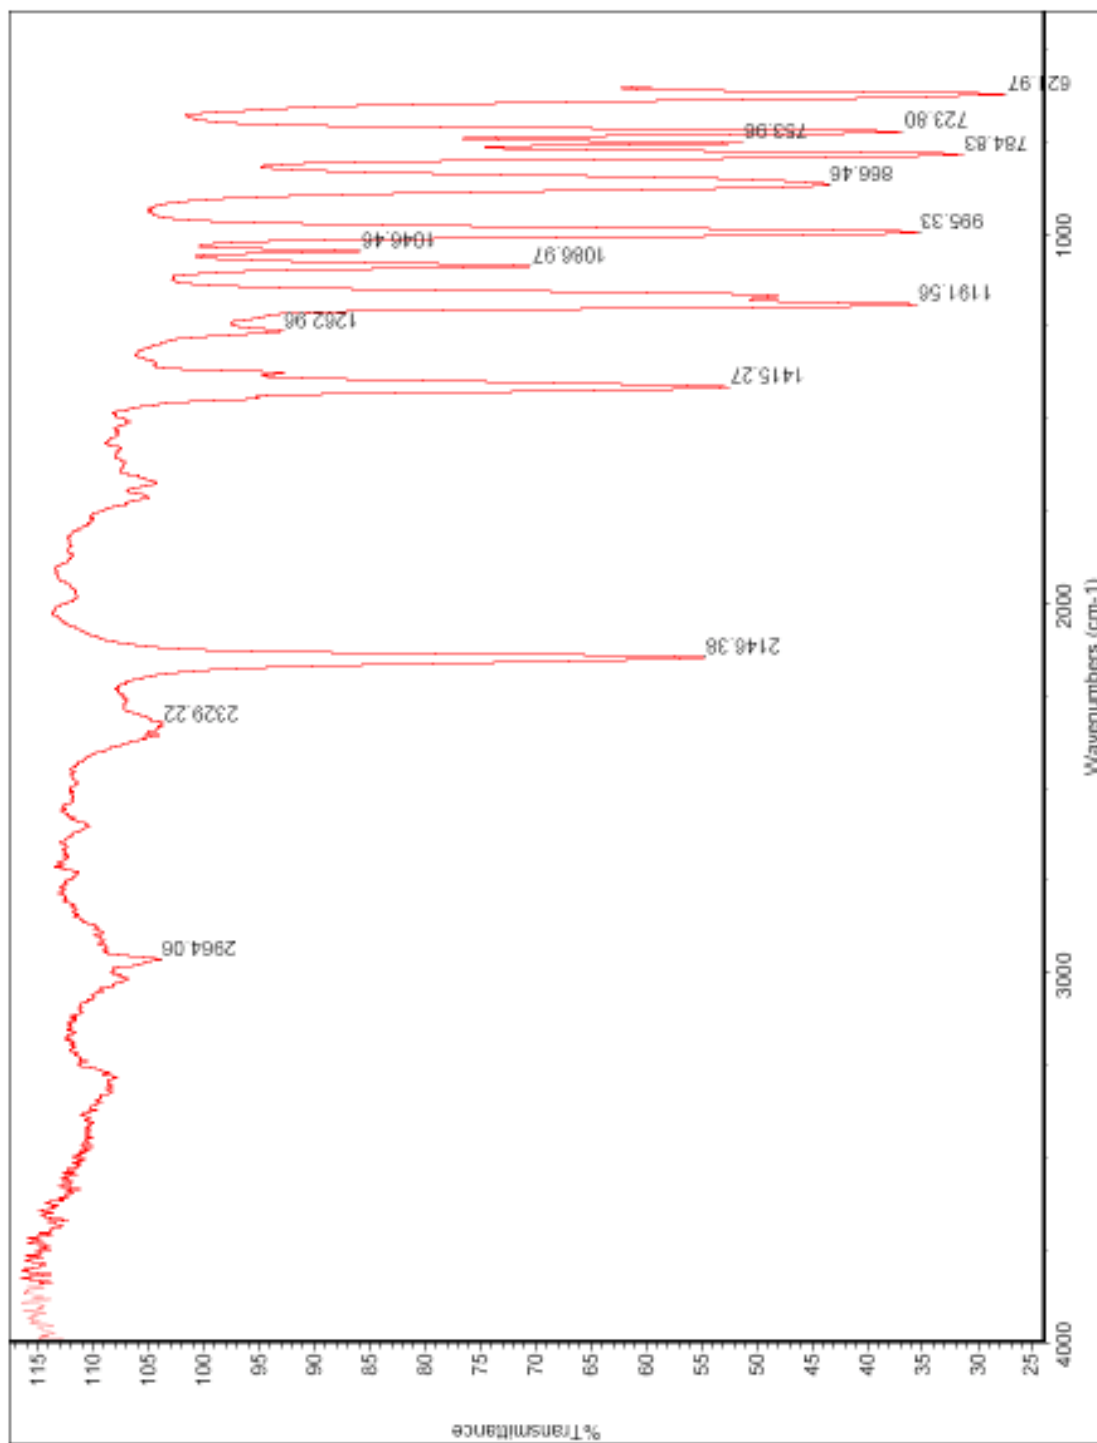



### 2-Phenyl-aziridine-1-sulfonic acid 2,2,2-trichloro-ethyl ester

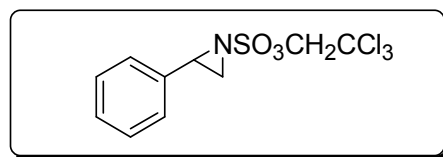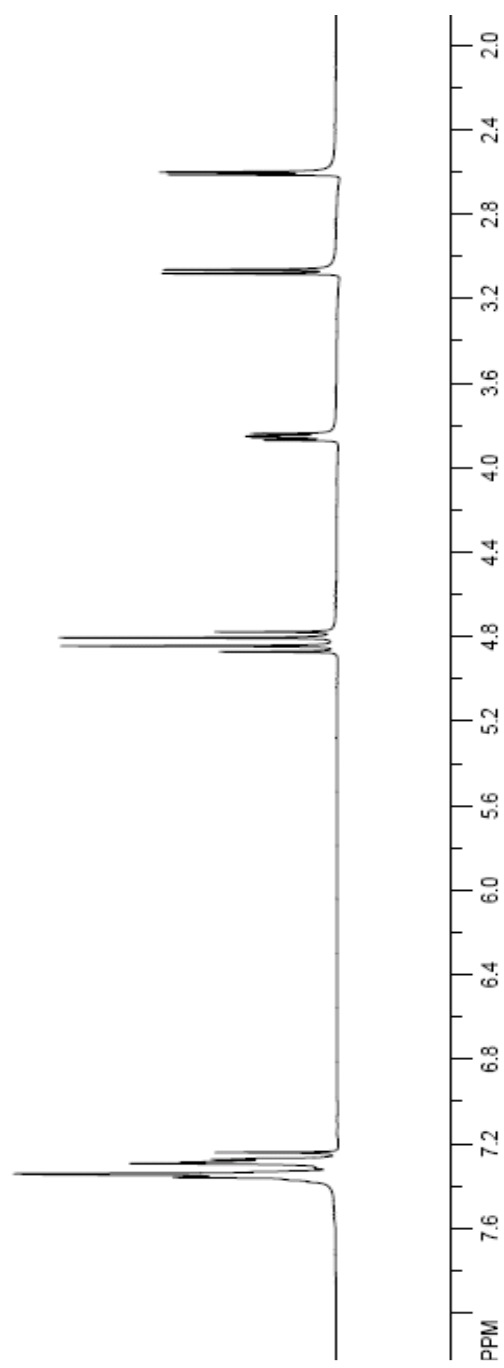

## 2-Phenyl-aziridine-1-sulfonic acid 2,2,2-trichloro-ethyl ester

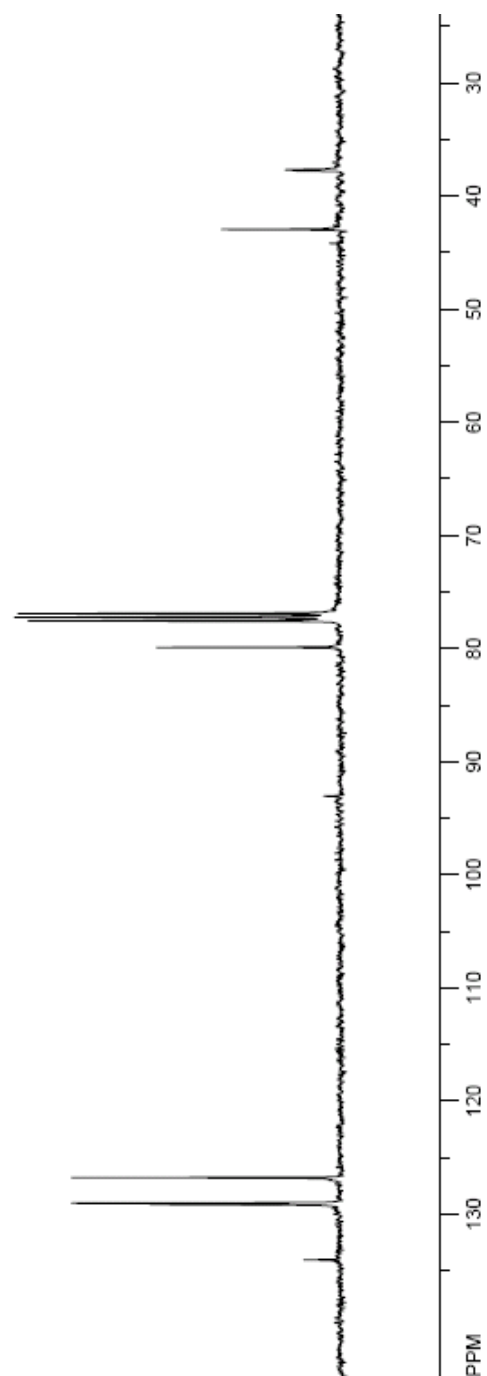

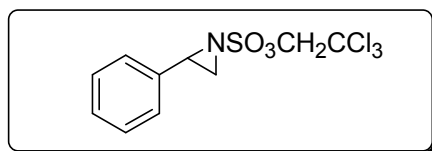

### 2-Phenyl-aziridine-1-sulfonic acid 2,2,2-trichloro-ethyl ester

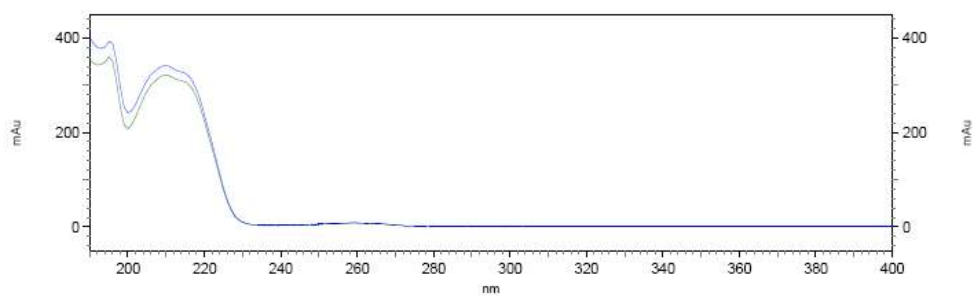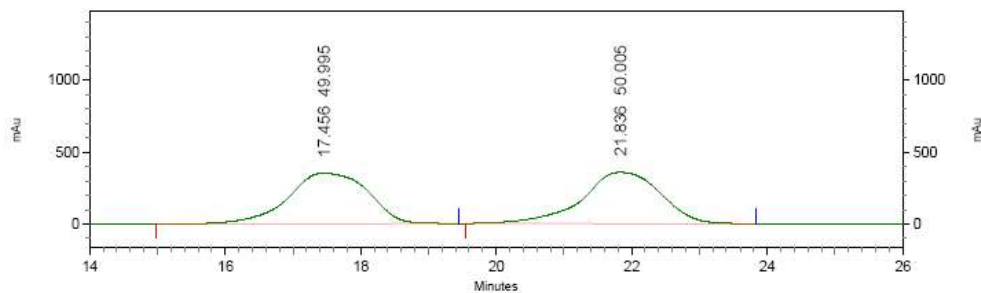

1: 225 nm, 4 nm Results

| Pk # | Retention Time | Area Percent |
|------|----------------|--------------|
| 1    | 17.456         | 49.995       |
| 2    | 21.836         | 50.005       |

|        |         |
|--------|---------|
| Totals | 100.000 |
|--------|---------|

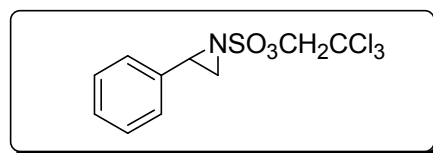

## 2-Phenyl-aziridine-1-sulfonic acid 2,2,2-trichloro-ethyl ester

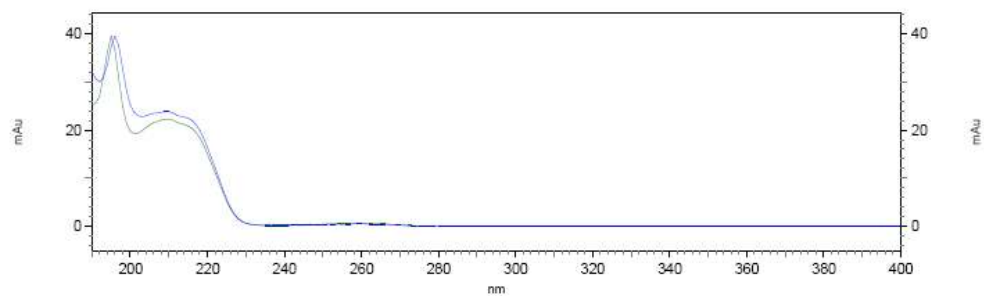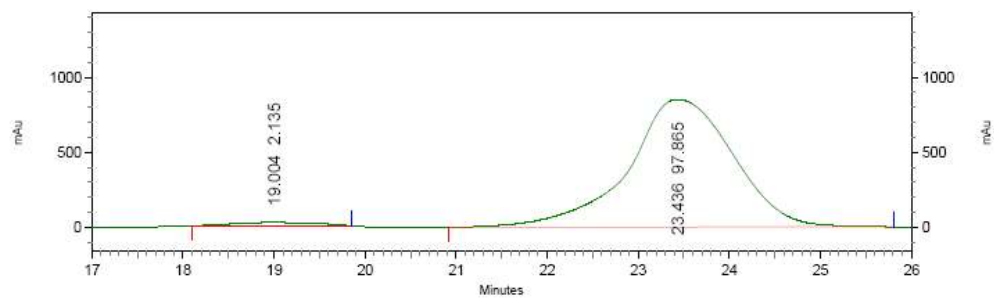

1: 225 nm, 4 nm Results

| Pk # | Retention Time | Area Percent |
|------|----------------|--------------|
| 1    | 19.004         | 2.135        |
| 2    | 23.436         | 97.865       |

|        |         |
|--------|---------|
| Totals | 100.000 |
|--------|---------|

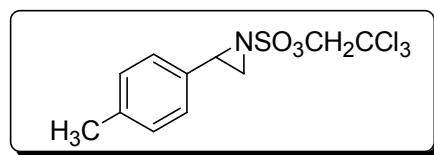

**2-*p*-Tolyl-2-aziridine-1-sulfonic acid 2,2,2-trichloro-ethyl ester**

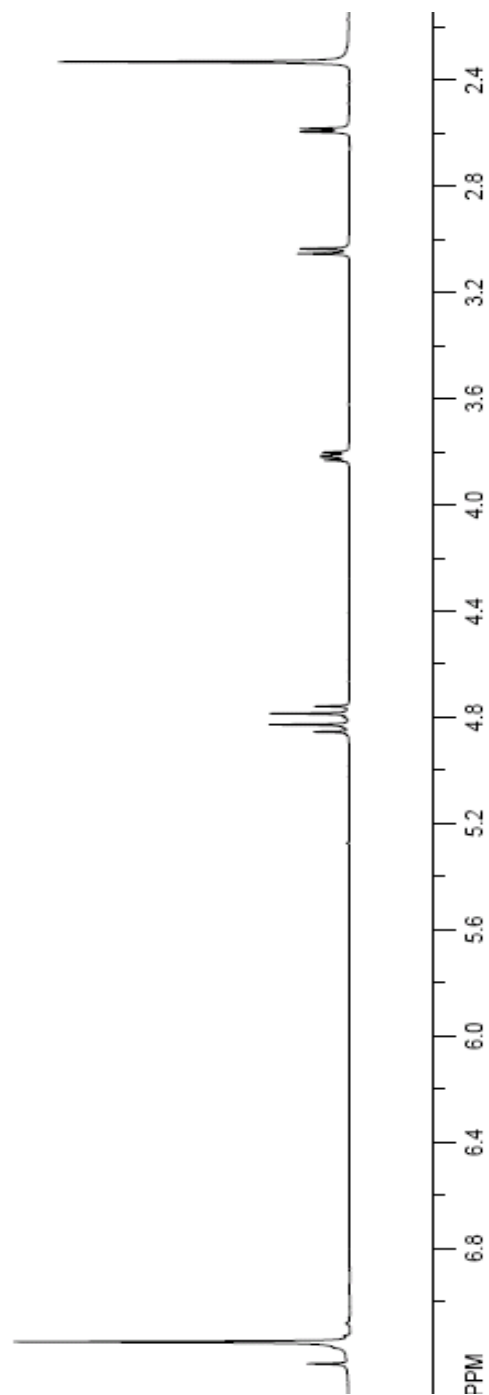

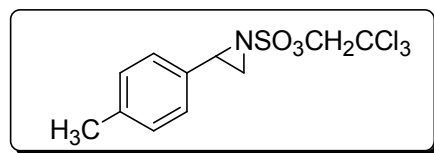

**2-*p*-Tolyl-2-aziridine-1-sulfonic acid 2,2,2-trichloro-ethyl ester**

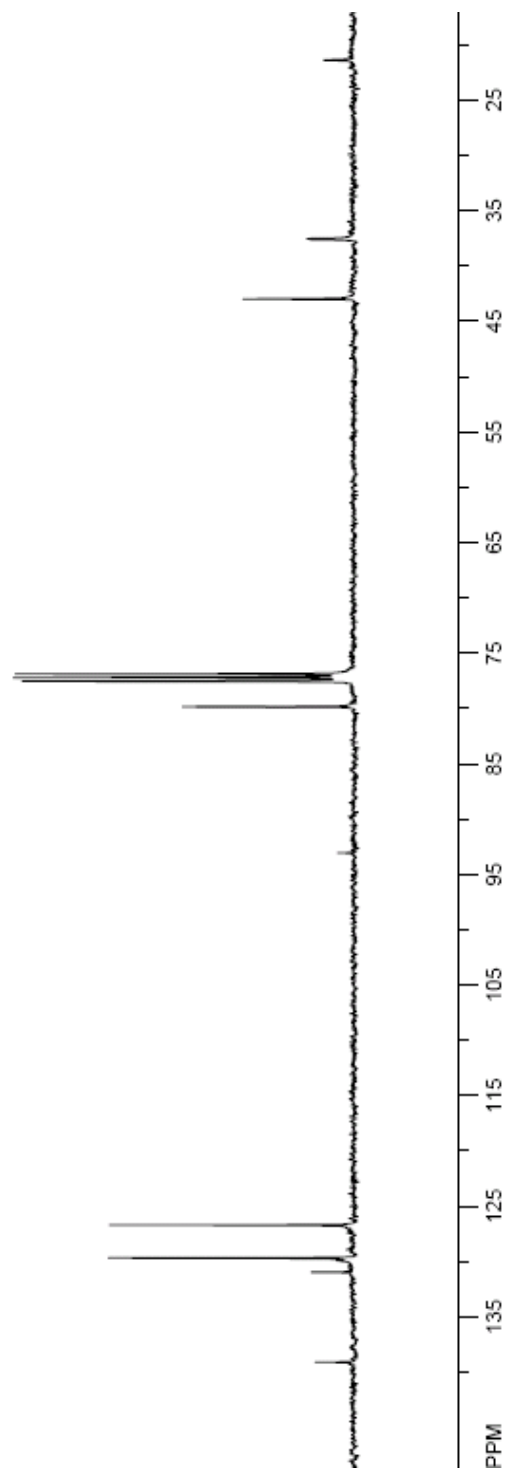

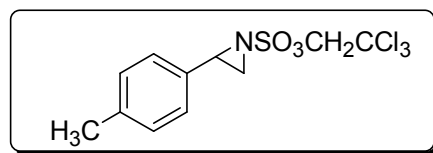

**2-*p*-Tolyl-2-aziridine-1-sulfonic acid 2,2,2-trichloro-ethyl ester**

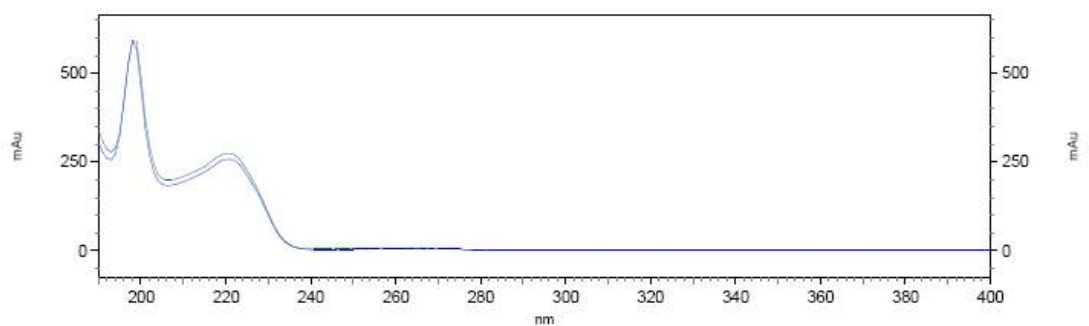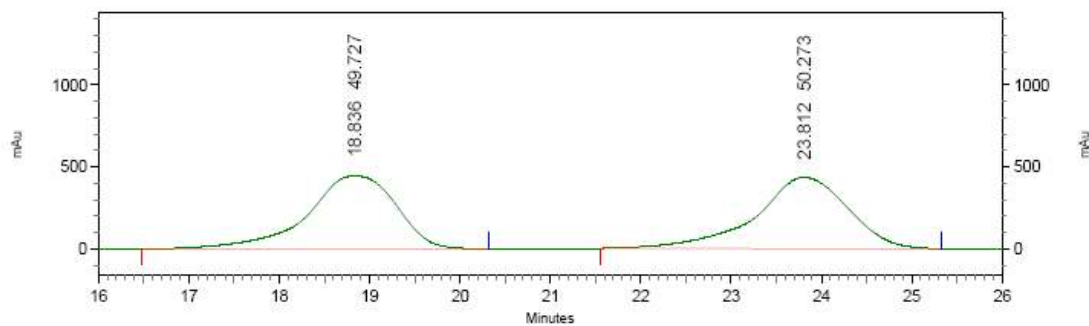

1: 225 nm, 4 nm Results

| Pk #   | Retention Time | Area Percent |
|--------|----------------|--------------|
| 1      | 18.836         | 49.727       |
| 2      | 23.812         | 50.273       |
| Totals |                | 100.000      |

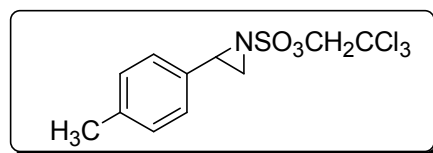

**2-*p*-Tolyl-2-aziridine-1-sulfonic acid 2,2,2-trichloro-ethyl ester**

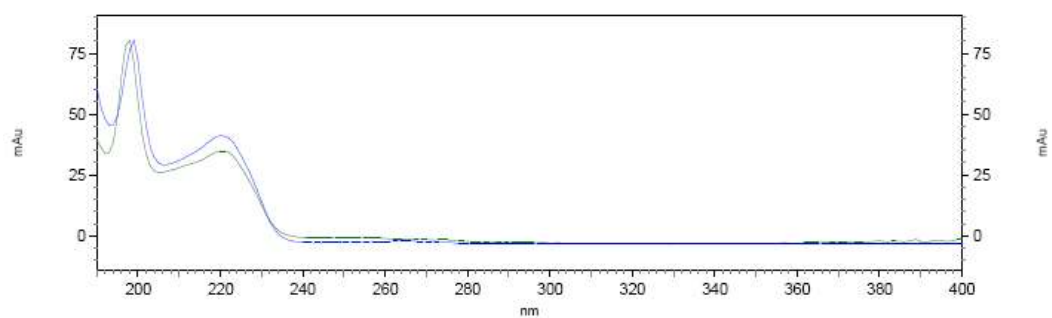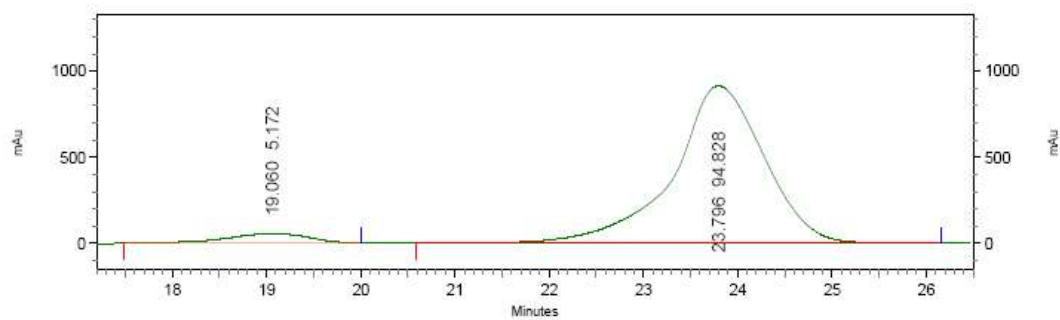

1: 225 nm, 4 nm Results

| Pk # | Retention Time | Area Percent |
|------|----------------|--------------|
| 1    | 19.060         | 5.172        |
| 2    | 23.796         | 94.828       |

|        |         |
|--------|---------|
| Totals | 100.000 |
|--------|---------|



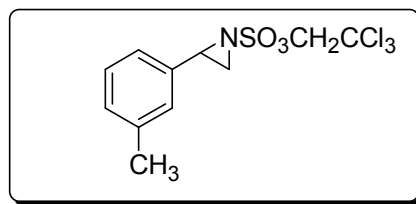

**2-*m*-Tolyl-2-aziridine-1-sulfonic acid 2,2,2-trichloro-ethyl ester**

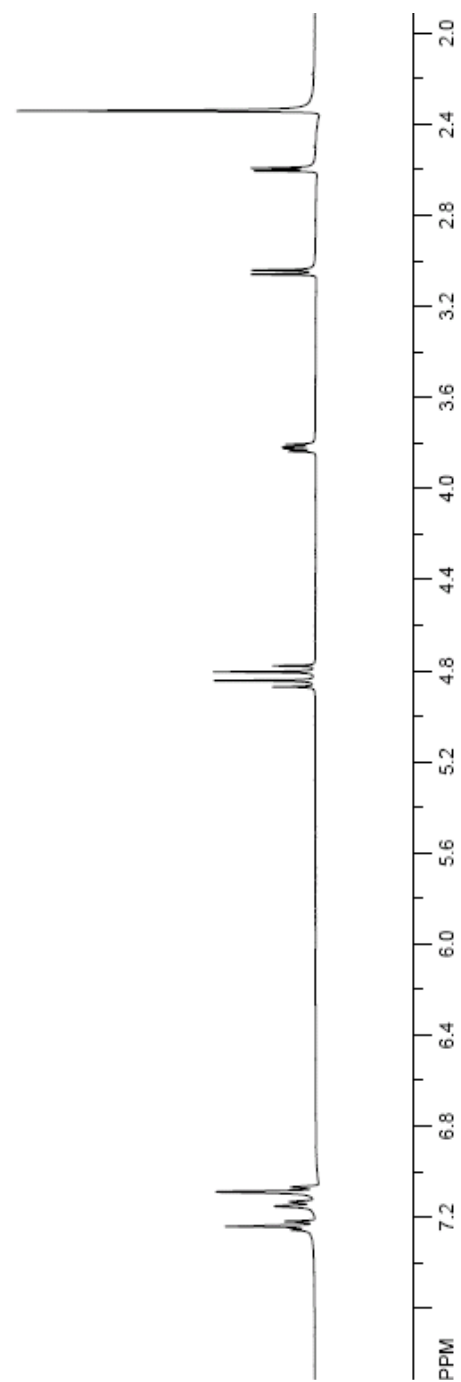

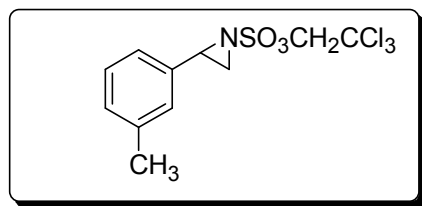

**2-*m*-Tolyl-2-aziridine-1-sulfonic acid 2,2,2-trichloro-ethyl ester**

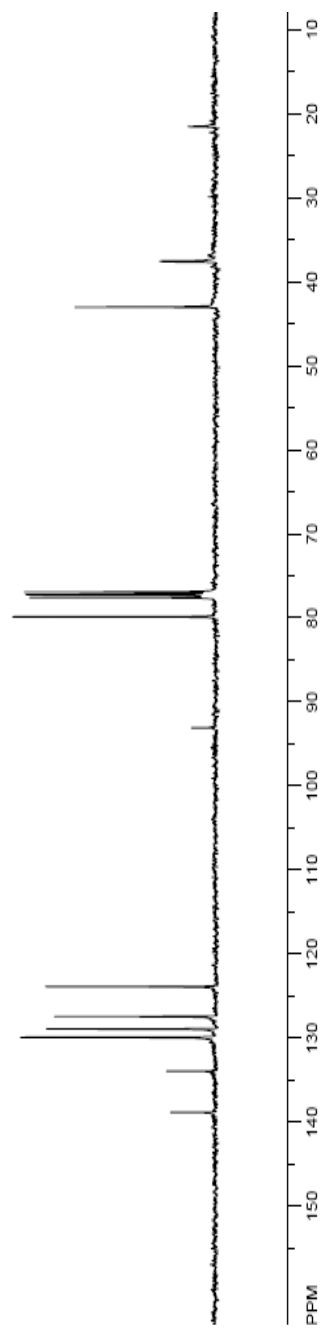

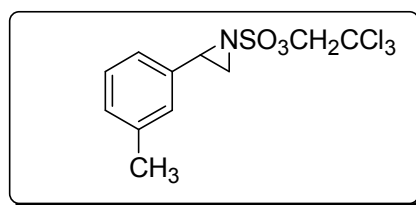

**2-*m*-Tolyl-2-aziridine-1-sulfonic acid 2,2,2-trichloro-ethyl ester**

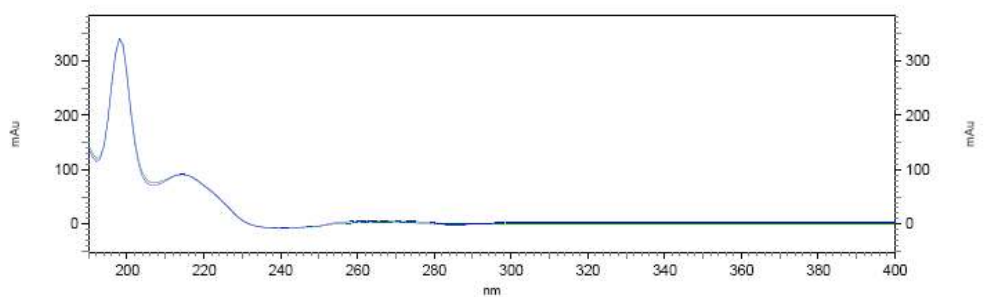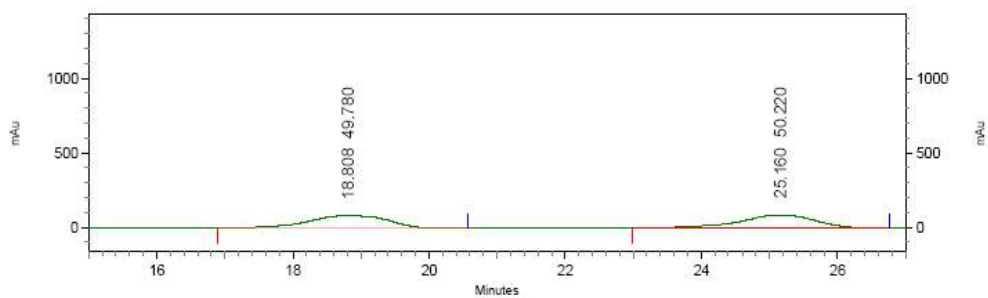

1: 225 nm, 4 nm Results

| Pk #   | Retention Time | Area Percent |
|--------|----------------|--------------|
| 1      | 18.808         | 49.780       |
| 2      | 25.160         | 50.220       |
| Totals |                | 100.000      |

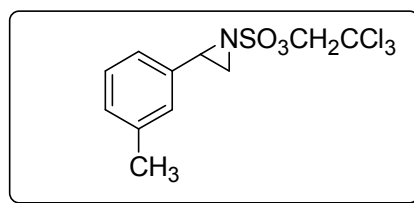

**2-*m*-Tolyl-2-aziridine-1-sulfonic acid 2,2,2-trichloro-ethyl ester**

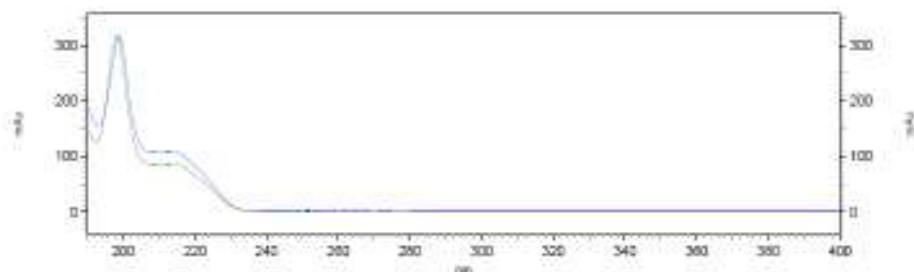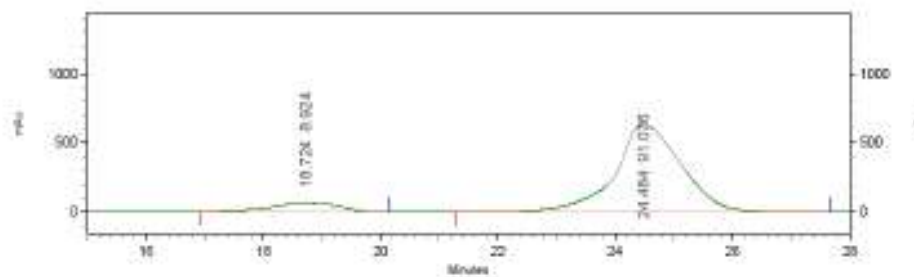

i: 225 nm, 4 nm Results

| pk #   | Retention Time | Area Percent |
|--------|----------------|--------------|
| 1      | 10.724         | 8.924        |
| 2      | 24.484         | 91.076       |
| Totals |                | 100.000      |

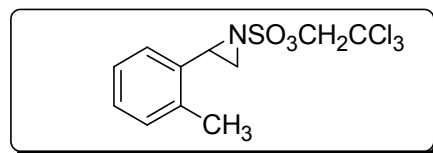

**2-*o*-Tolyl-2-aziridine-1-sulfonic acid 2,2,2-trichloro-ethyl ester**

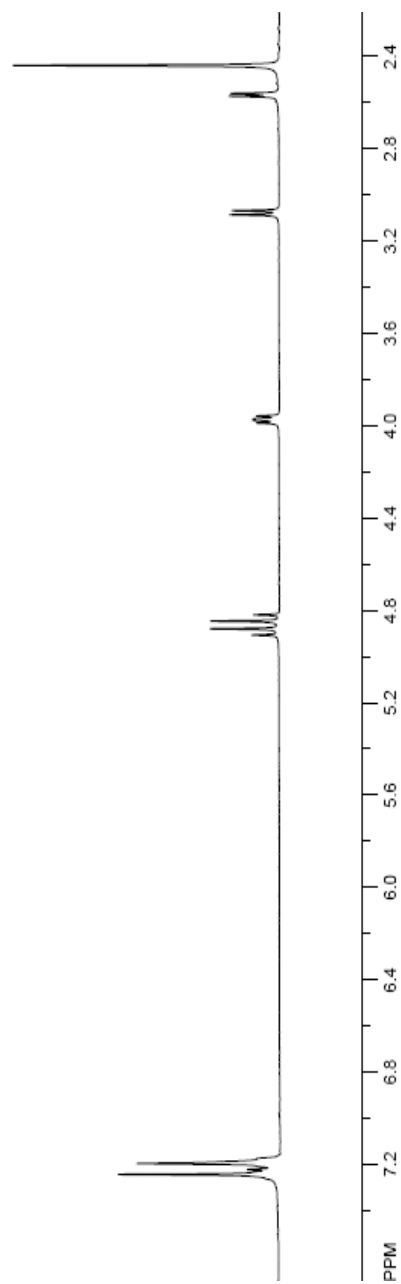

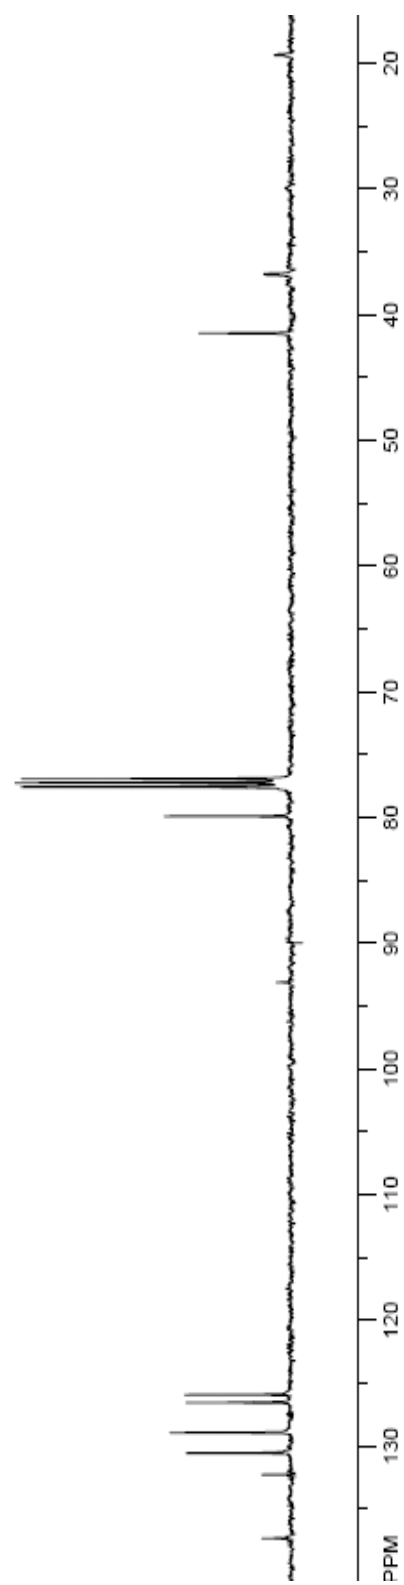

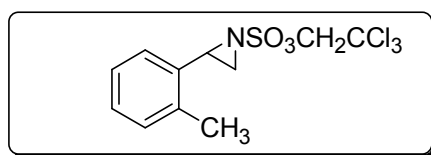

**2-*o*-Tolyl-2-aziridine-1-sulfonic acid 2,2,2-trichloro-ethyl ester**

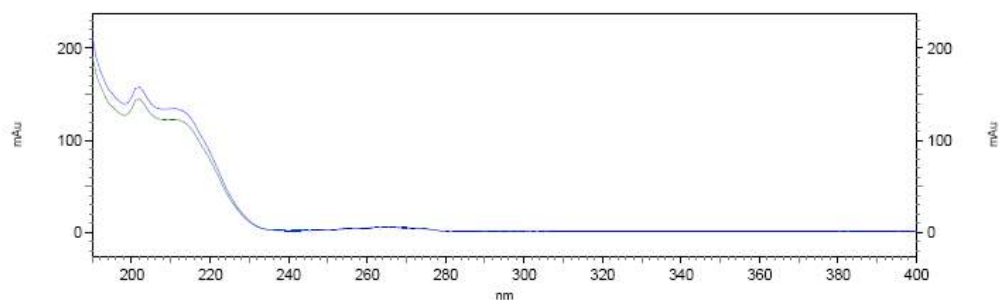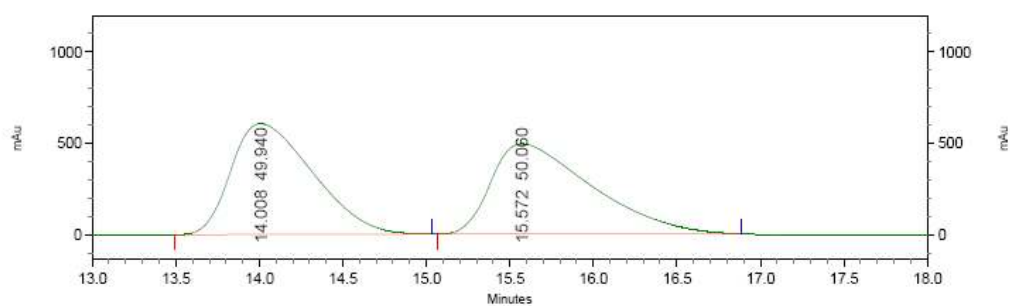

1: 225 nm, 4 nm Results

| Pk #   | Retention Time | Area Percent |
|--------|----------------|--------------|
| 1      | 14.008         | 49.940       |
| 2      | 15.572         | 50.060       |
| Totals |                | 100.000      |

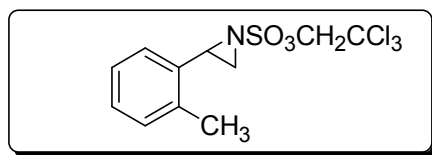

**2-*o*-Tolyl-2-aziridine-1-sulfonic acid 2,2,2-trichloro-ethyl ester**

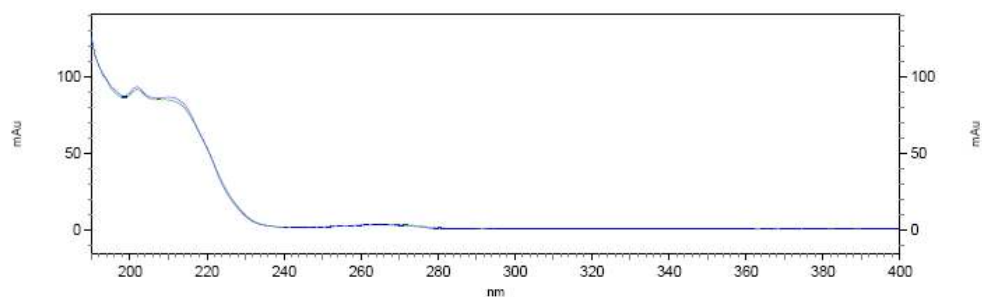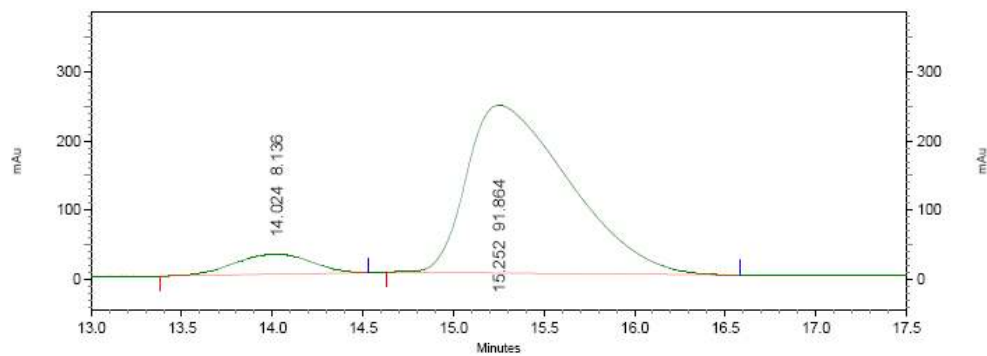

1: 232 nm, 4 nm Results

| PK # | Retention Time | Area Percent |
|------|----------------|--------------|
| 1    | 14.024         | 8.136        |
| 2    | 15.252         | 91.864       |

|        |         |
|--------|---------|
| Totals | 100.000 |
|--------|---------|



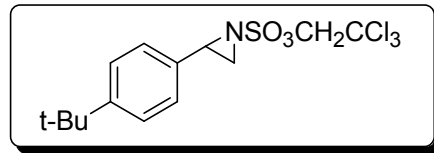

**2-(4-*tert*-Butyl-phenyl)-aziridine-1-sulfonic acid 2,2,2-trichloro-ethyl ester**

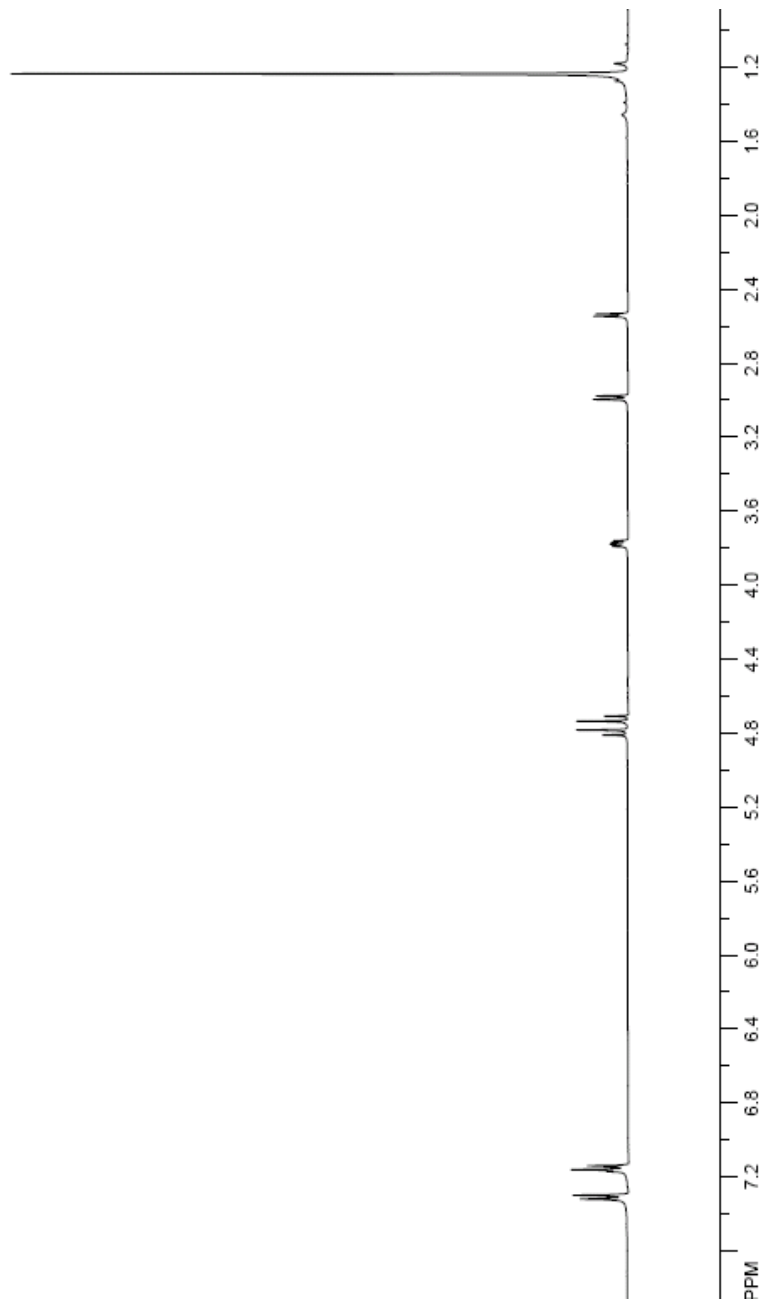

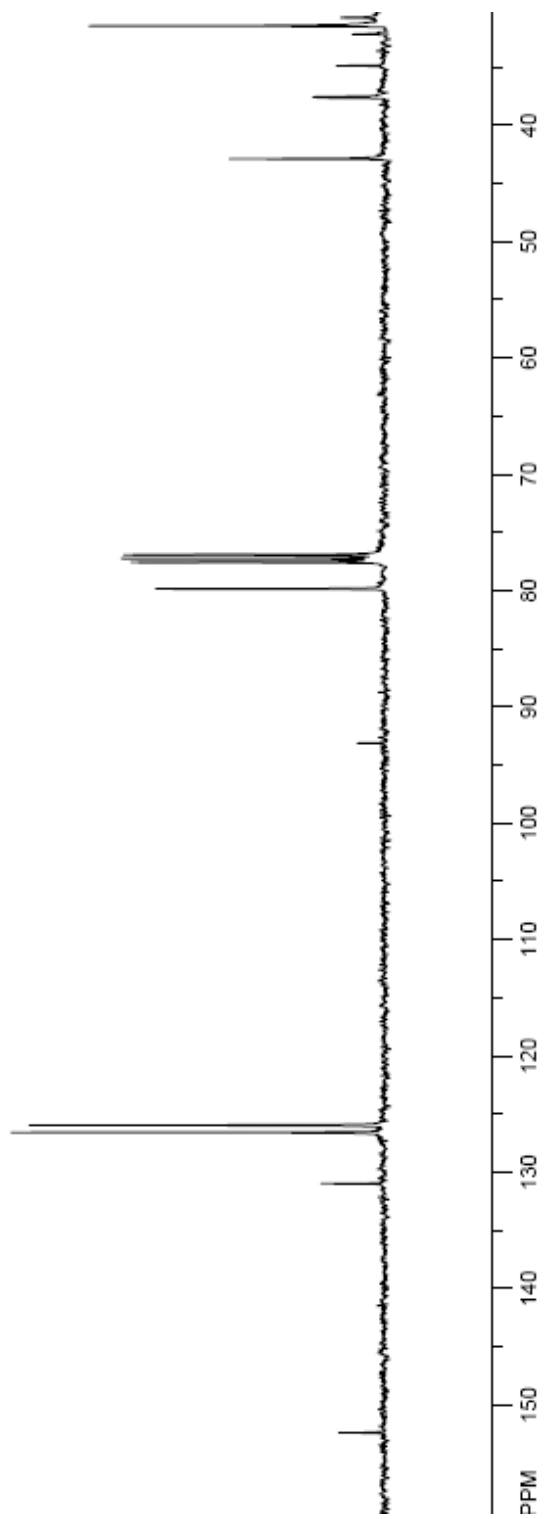

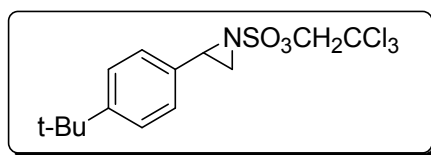

## 2-(4-*tert*-Butyl-phenyl)-aziridine-1-sulfonic acid 2,2,2-trichloro-ethyl ester

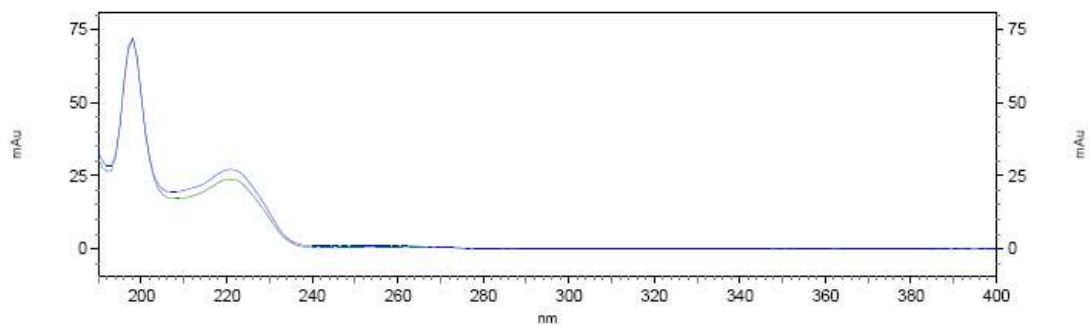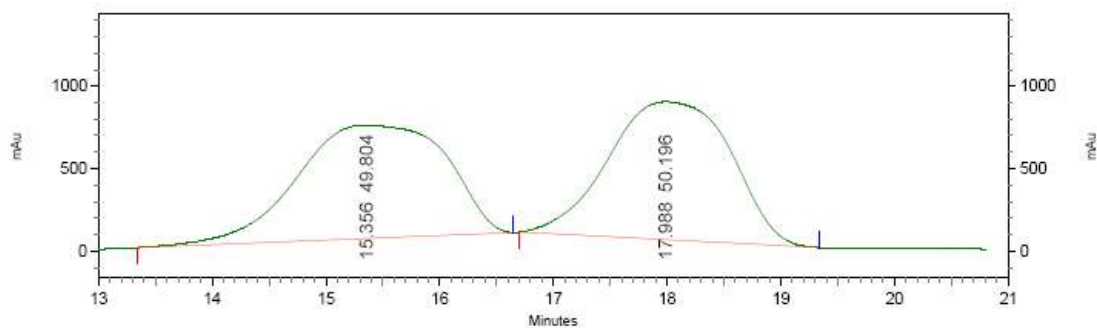

1: 225 nm, 4 nm Results

| Pk #   | Retention Time | Area Percent |
|--------|----------------|--------------|
| 1      | 15.356         | 49.804       |
| 2      | 17.988         | 50.196       |
| Totals |                | 100.000      |

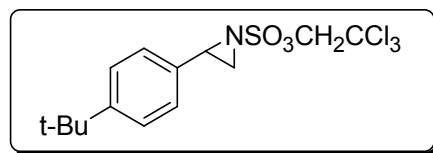

## 2-(4-*tert*-Butyl-phenyl)-aziridine-1-sulfonic acid 2,2,2-trichloro-ethyl ester

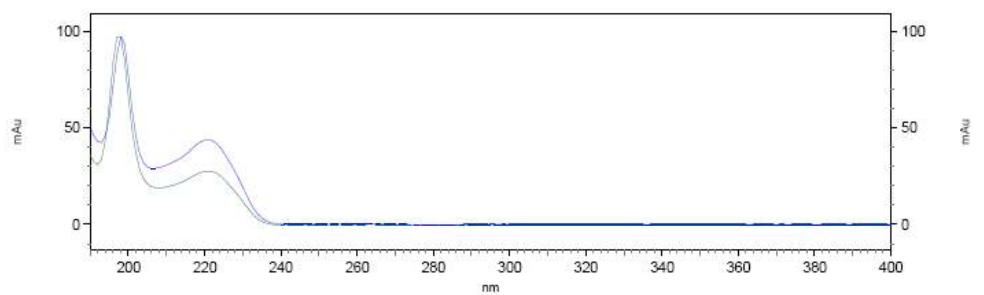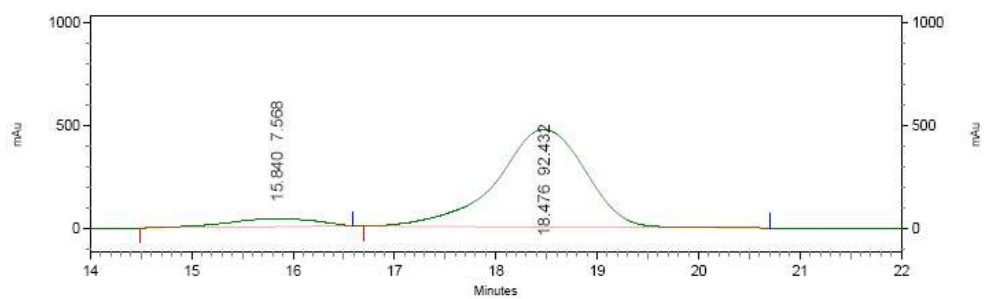

1: 225 nm, 4 nm Results

| Pk # | Retention Time | Area Percent |
|------|----------------|--------------|
| 1    | 15.840         | 7.568        |
| 2    | 18.476         | 92.432       |

|        |  |         |
|--------|--|---------|
| Totals |  | 100.000 |
|--------|--|---------|

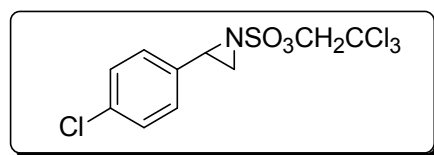

**2-(4-Chloro-phenyl)-aziridine-1-sulfonic acid 2,2,2-trichloro-ethyl ester**

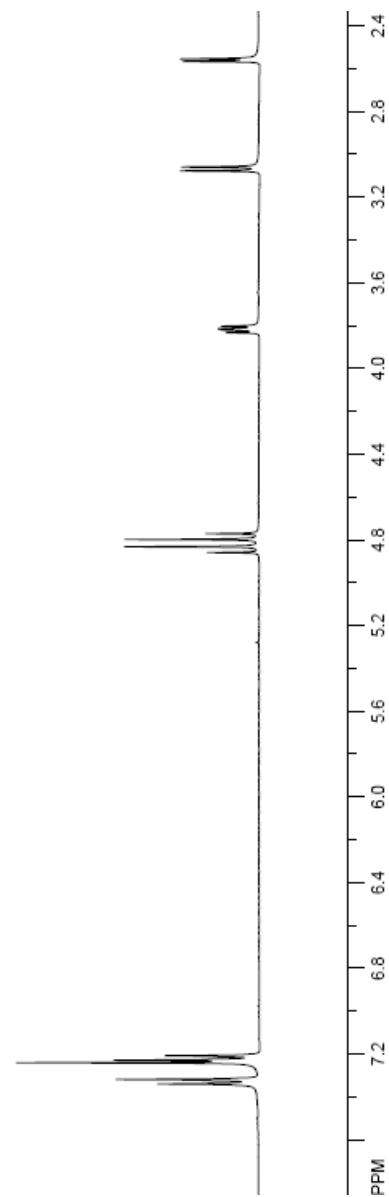

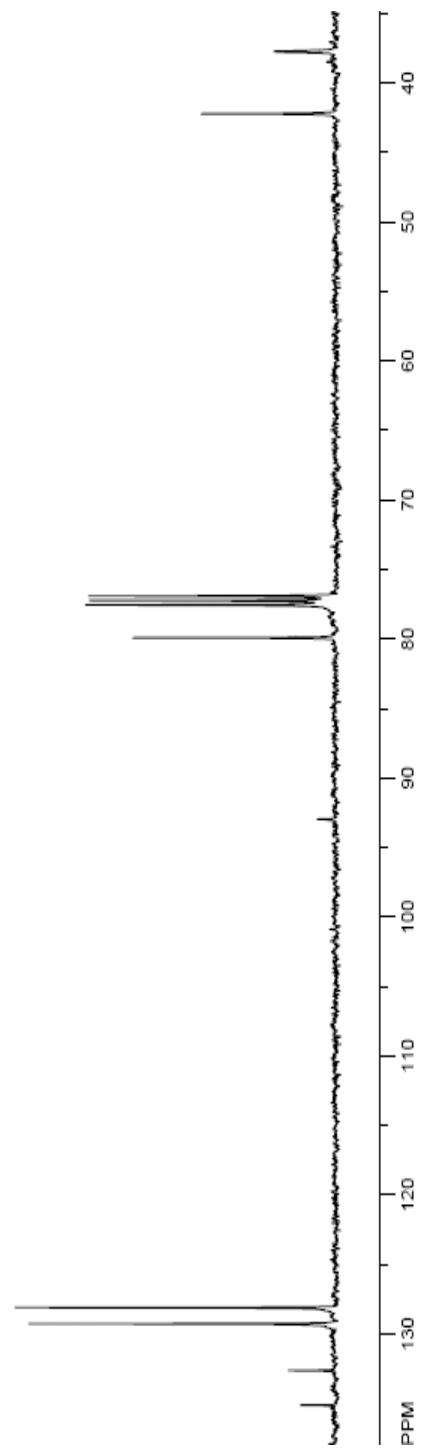

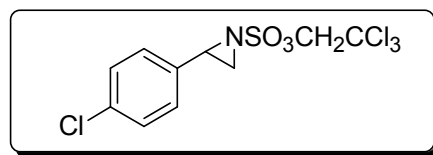

### 2-(4-Chloro-phenyl)-aziridine-1-sulfonic acid 2,2,2-trichloro-ethyl ester

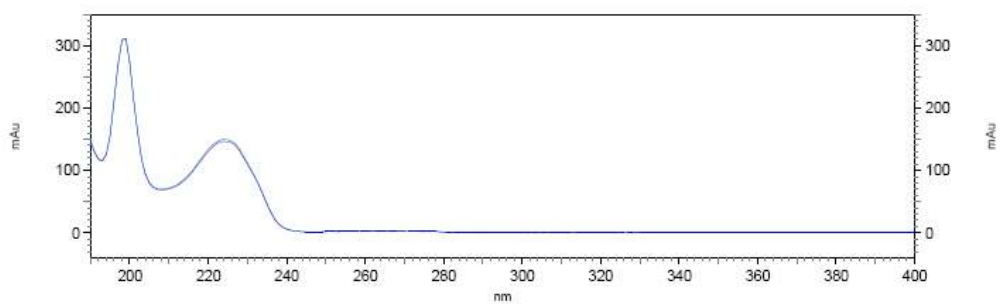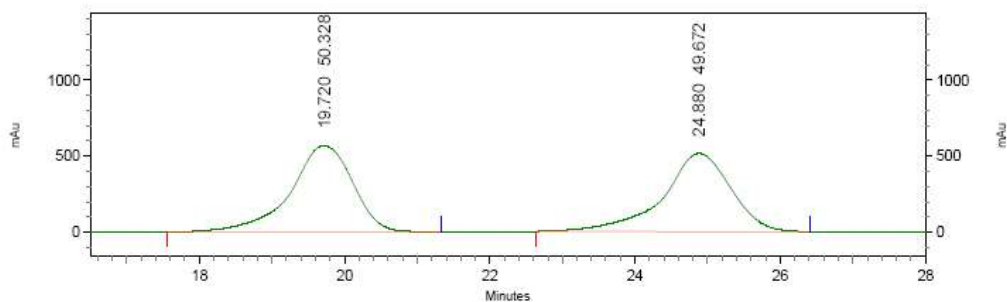

1: 225 nm, 4 nm Results

| Pk #   | Retention Time | Area Percent |
|--------|----------------|--------------|
| 1      | 19.720         | 50.328       |
| 2      | 24.880         | 49.672       |
| Totals |                | 100.000      |

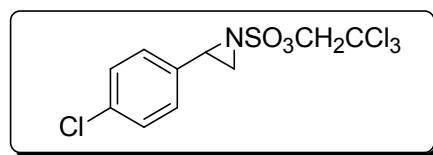

## 2-(4-Chloro-phenyl)-aziridine-1-sulfonic acid 2,2,2-trichloro-ethyl ester

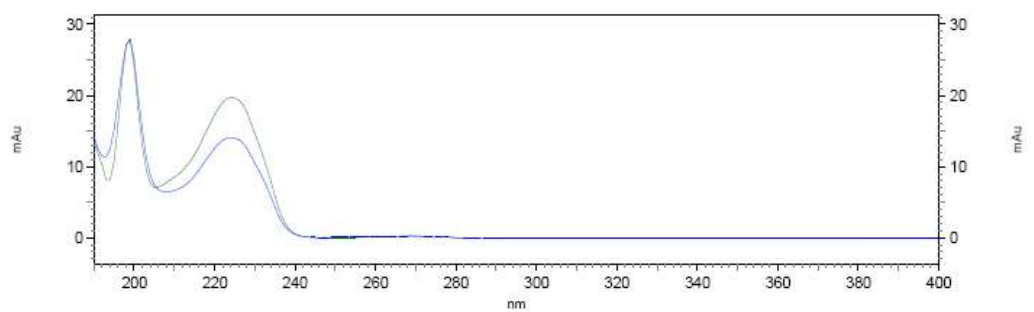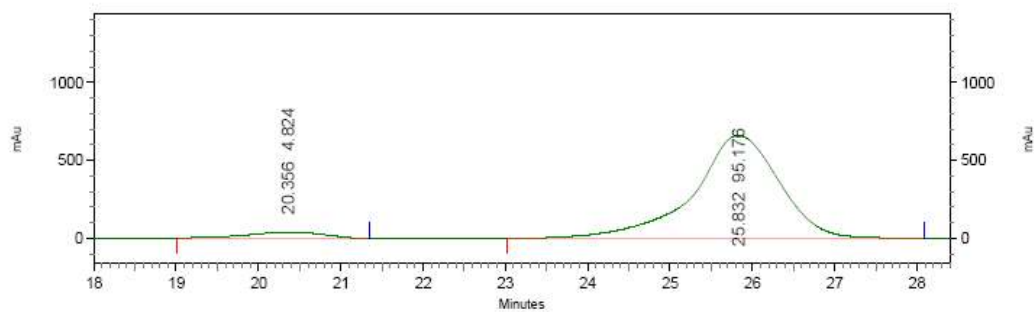

1: 225 nm, 4 nm Results

| Pk # | Retention Time | Area Percent |
|------|----------------|--------------|
| 1    | 20.356         | 4.824        |
| 2    | 25.832         | 95.176       |

|        |         |
|--------|---------|
| Totals | 100.000 |
|--------|---------|



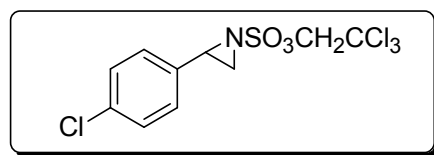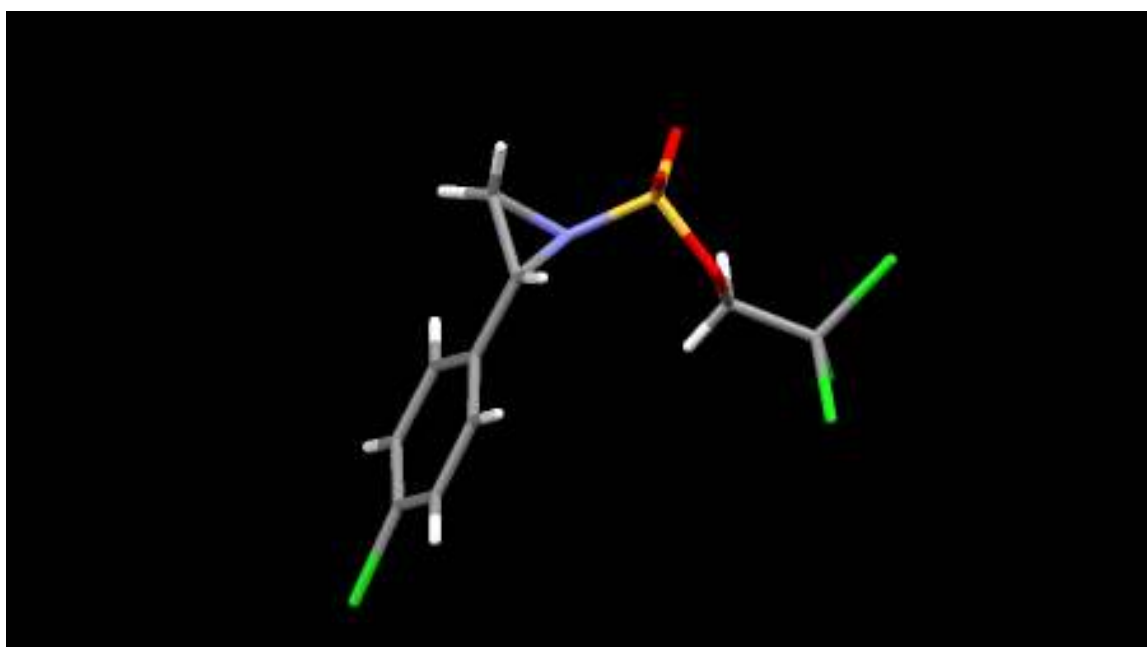

**X-Ray structural of 2-(4-Chloro-phenyl)-aziridine-1-sulfonic acid 2,2,2-trichloro-ethyl ester**

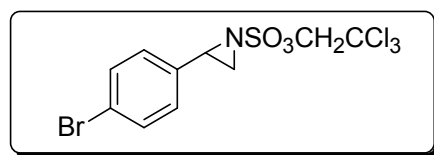

**2-(4-Bromo-phenyl)-aziridine-1-sulfonic acid 2,2,2-trichloro-ethyl ester**

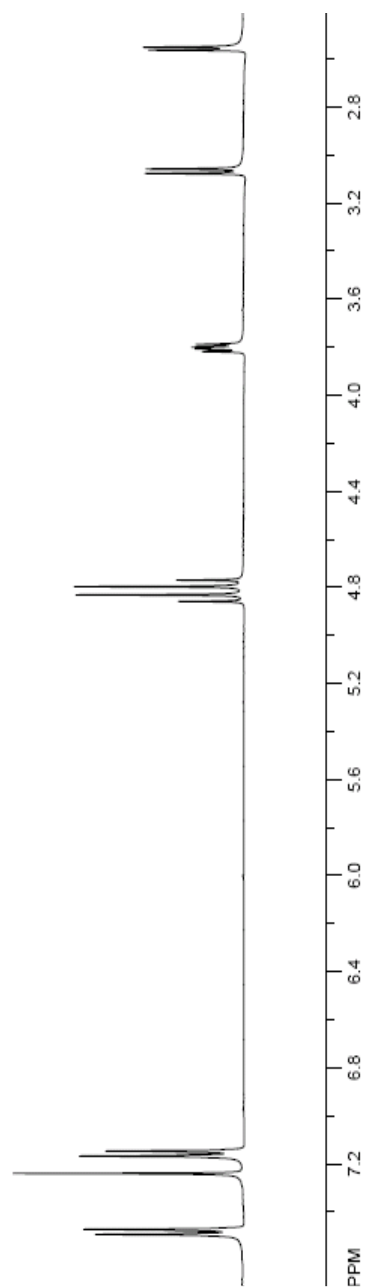

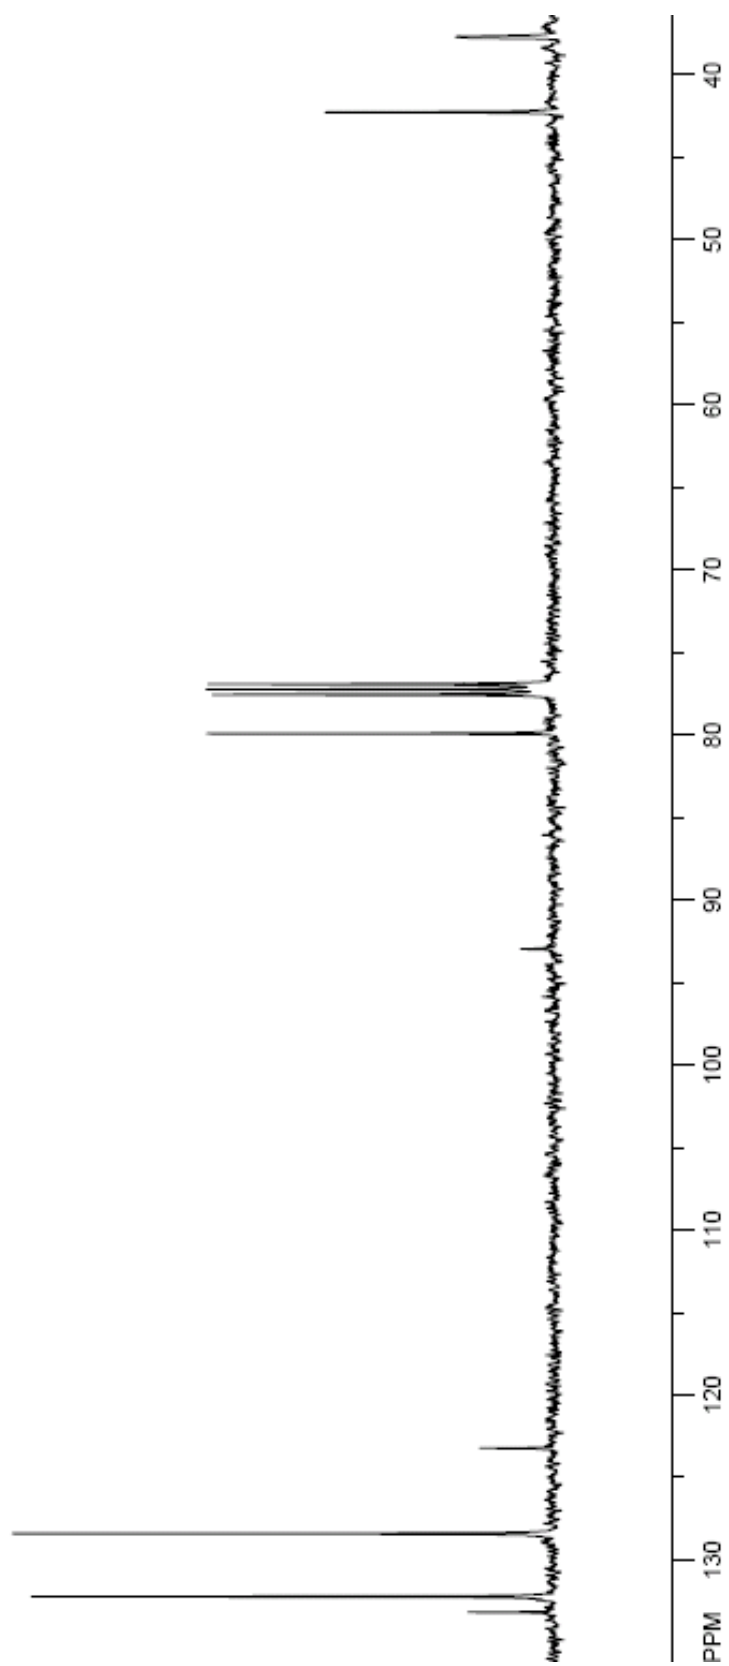

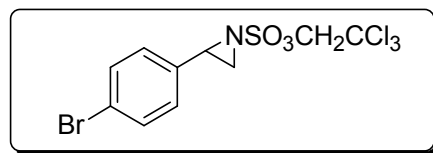

## 2-(4-Bromo-phenyl)-aziridine-1-sulfonic acid 2,2,2-trichloro-ethyl ester

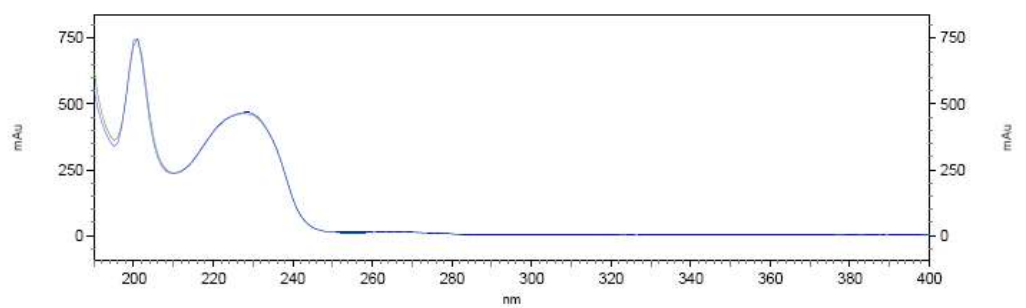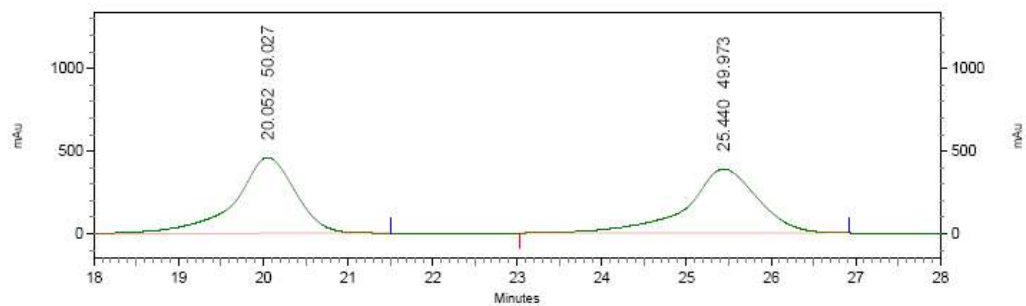

1: 225 nm, 4 nm Results

| PK # | Retention Time | Area Percent |
|------|----------------|--------------|
| 1    | 20.052         | 50.027       |
| 2    | 25.440         | 49.973       |

| Totals | Area Percent |
|--------|--------------|
|        | 100.000      |

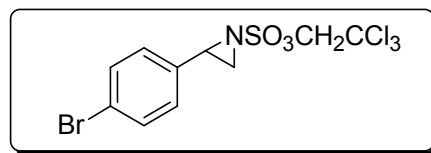

## 2-(4-Bromo-phenyl)-aziridine-1-sulfonic acid 2,2,2-trichloro-ethyl ester

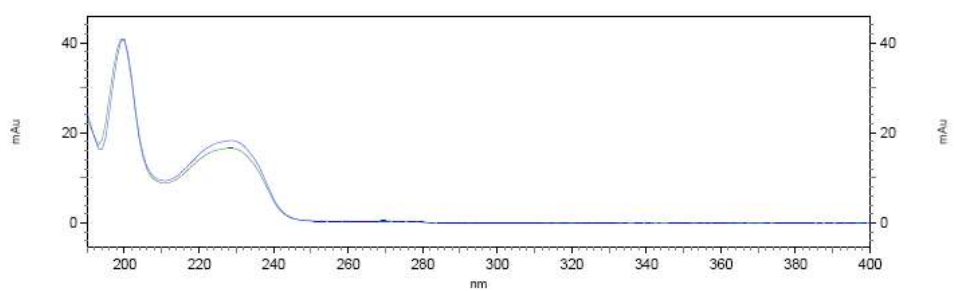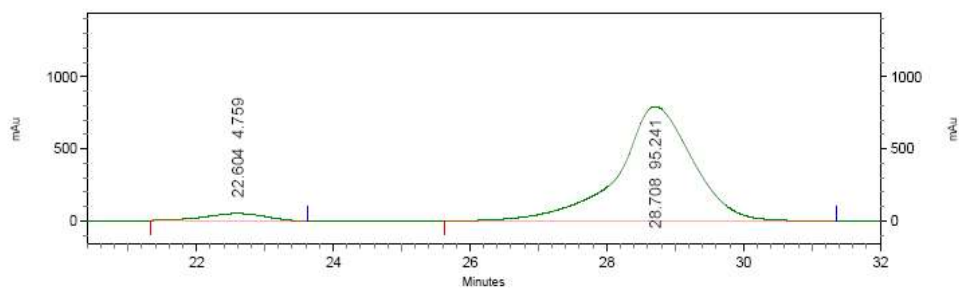

1: 225 nm, 4 nm Results

| Pk # | Retention Time | Area Percent |
|------|----------------|--------------|
| 1    | 22.604         | 4.759        |
| 2    | 28.708         | 95.241       |

|        |  |         |
|--------|--|---------|
| Totals |  | 100.000 |
|--------|--|---------|

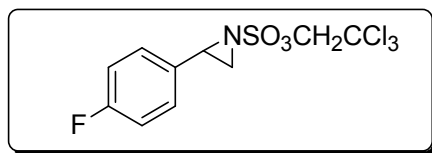

**2-(4-Fluoro-phenyl)-aziridine-1-sulfonic acid 2,2,2-trichloro-ethyl ester**

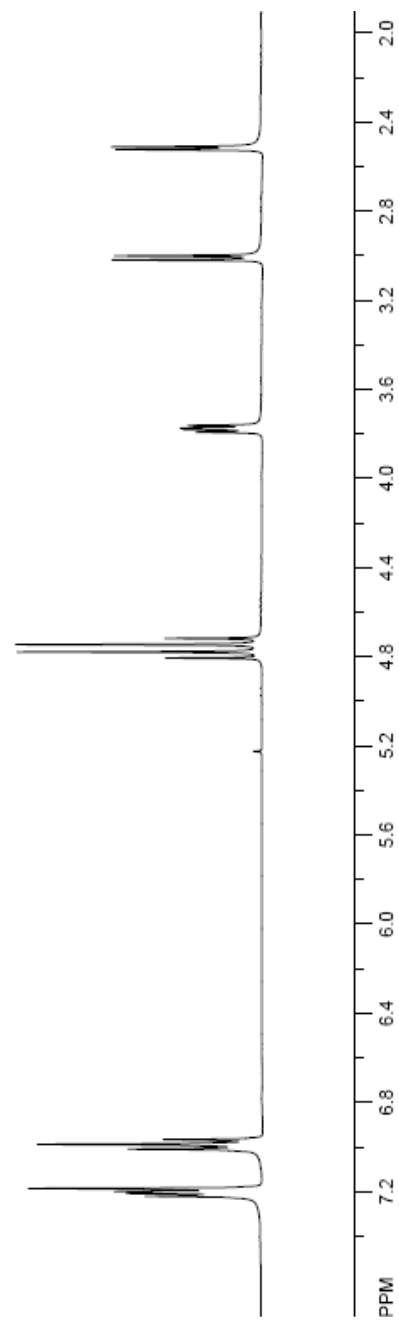

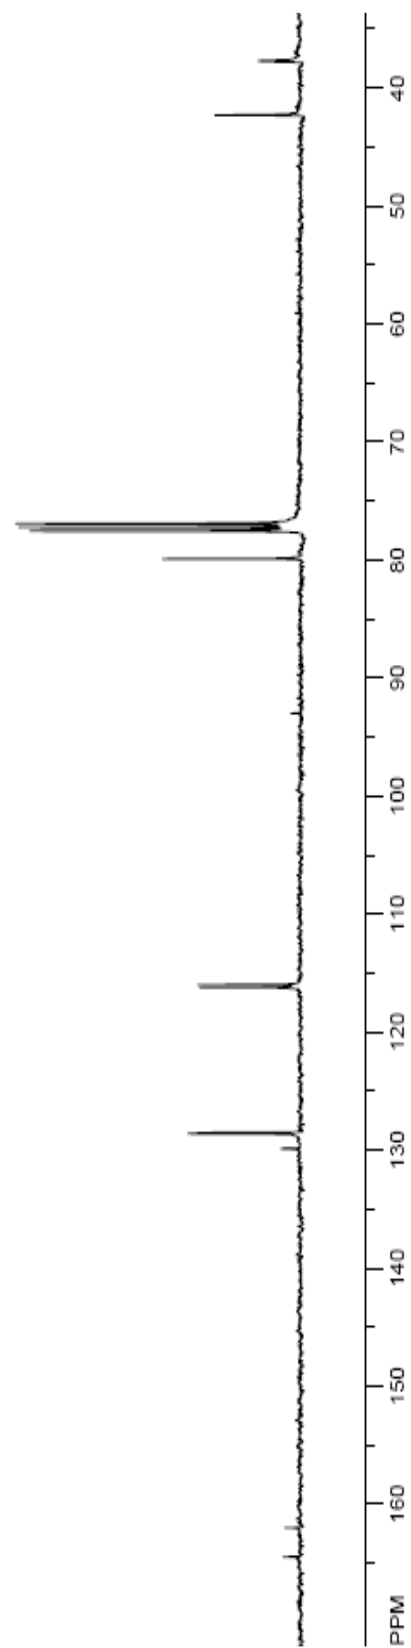

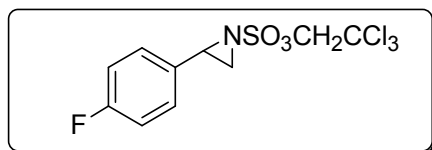

## 2-(4-Fluoro-phenyl)-aziridine-1-sulfonic acid 2,2,2-trichloro-ethyl ester

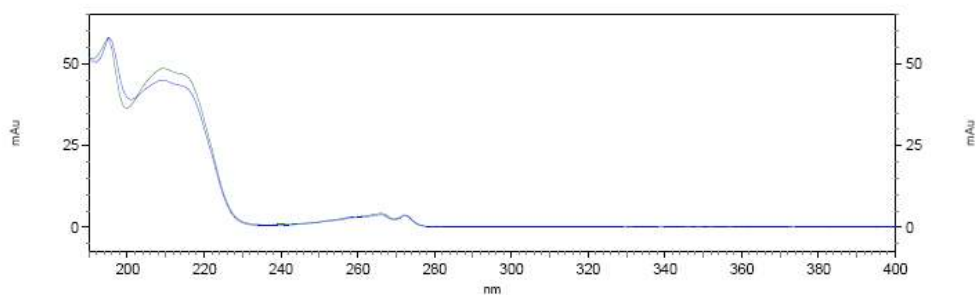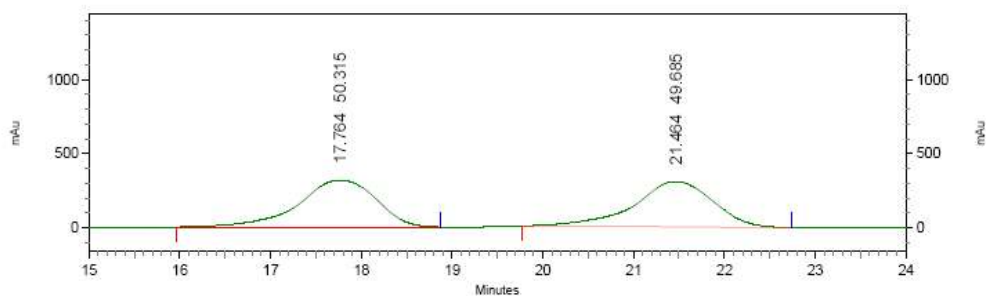

1: 225 nm, 4 nm Results

| Pk # | Retention Time | Area Percent |
|------|----------------|--------------|
| 1    | 17.764         | 50.315       |
| 2    | 21.464         | 49.685       |

| Totals | Area Percent |
|--------|--------------|
|        | 100.000      |



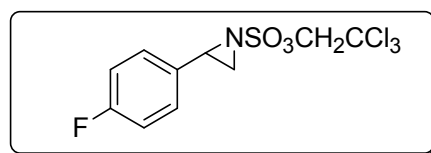

### 2-(4-Fluoro-phenyl)-aziridine-1-sulfonic acid 2,2,2-trichloro-ethyl ester

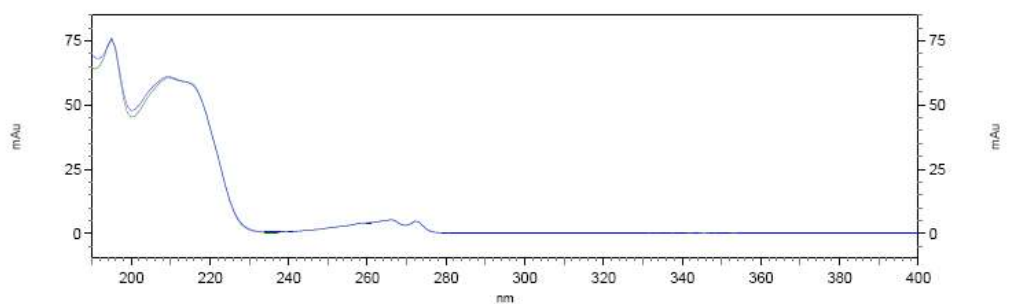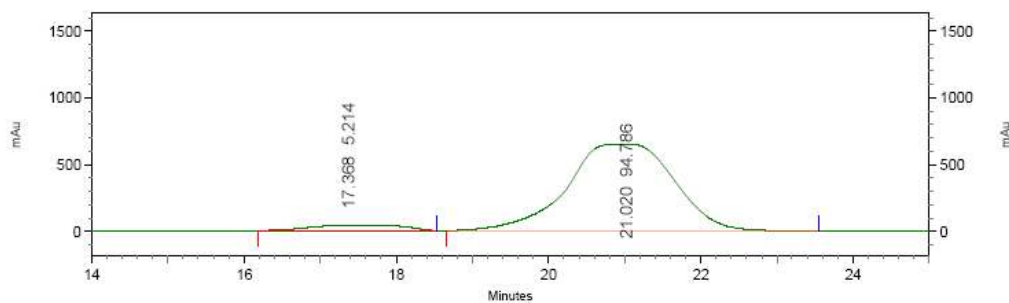

1: 225 nm, 4 nm Results

| Pk # | Retention Time | Area Percent |
|------|----------------|--------------|
| 1    | 17.368         | 5.214        |
| 2    | 21.020         | 94.786       |

|        |  |         |
|--------|--|---------|
| Totals |  | 100.000 |
|--------|--|---------|

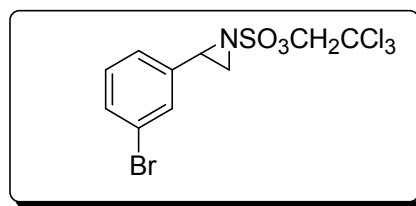

**2-(3-Bromo-phenyl)-aziridine-1-sulfonic acid 2,2,2-trichloro-ethyl ester**

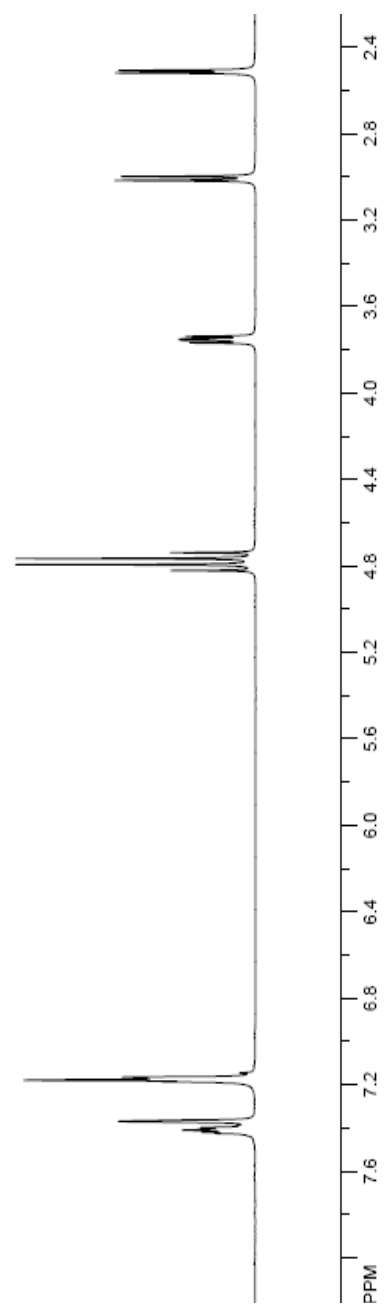

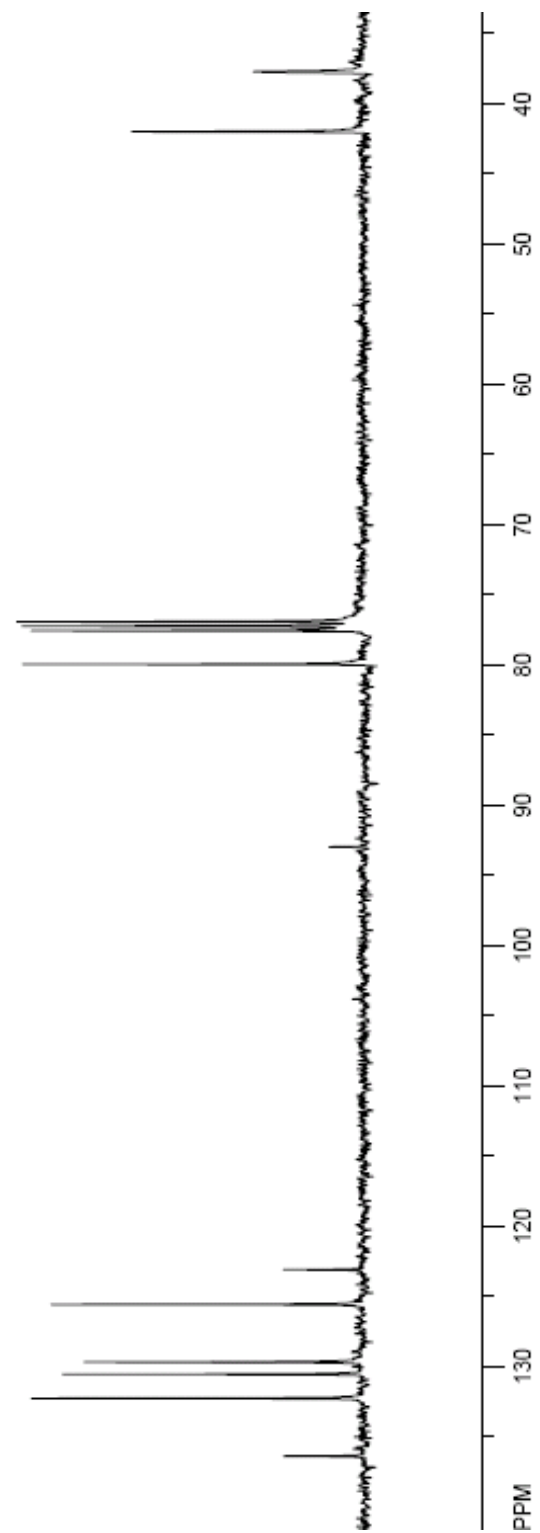

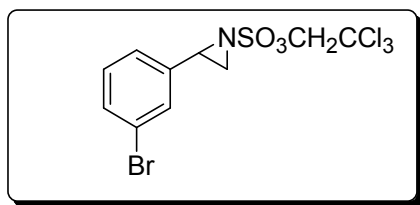

**2-(3-Bromo-phenyl)-aziridine-1-sulfonic acid 2,2,2-trichloro-ethyl ester**

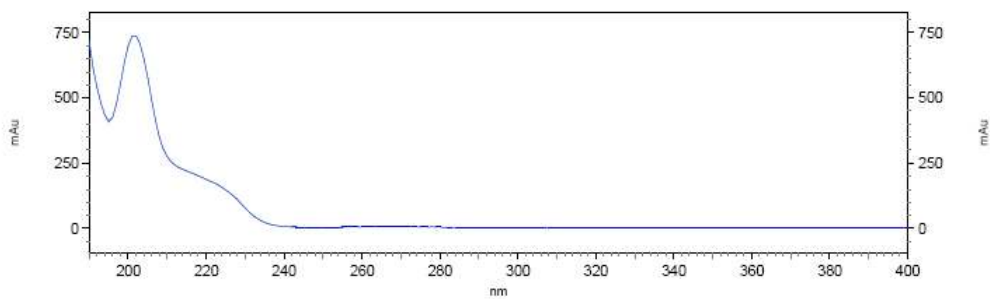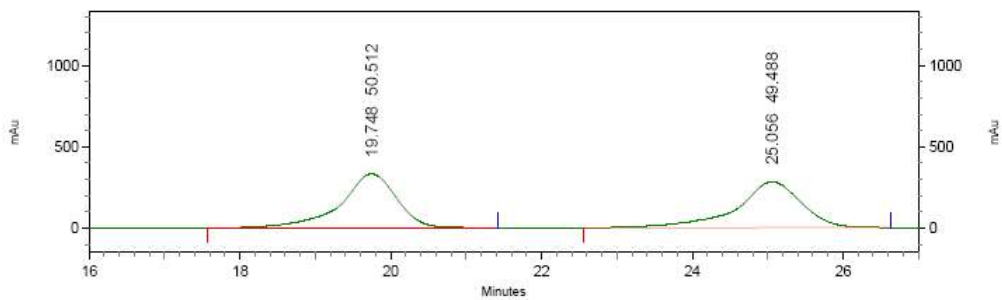

1: 225 nm, 4 nm Results

| Pk #   | Retention Time | Area Percent |
|--------|----------------|--------------|
| 1      | 19.748         | 50.512       |
| 2      | 25.056         | 49.488       |
| Totals |                | 100.000      |

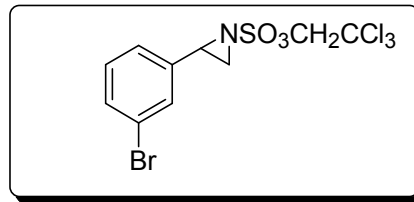

## 2-(3-Bromo-phenyl)-aziridine-1-sulfonic acid 2,2,2-trichloro-ethyl ester

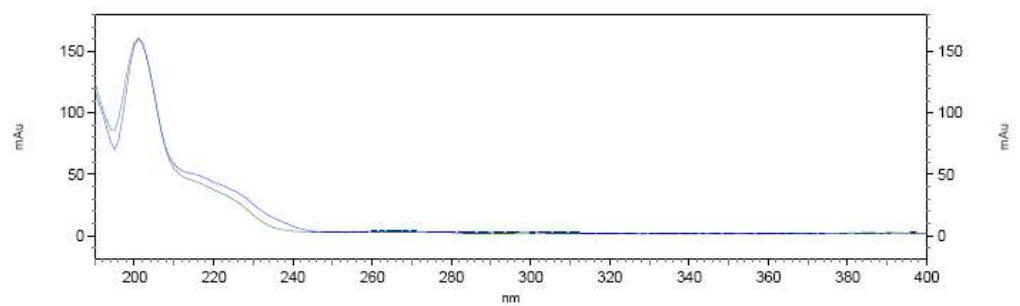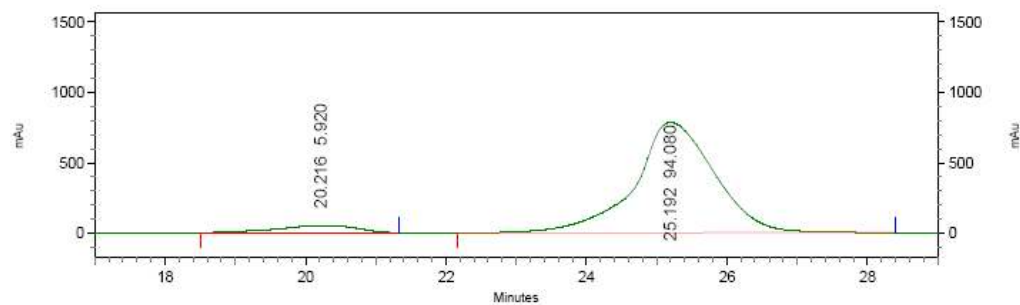

1: 225 nm, 4 nm Results

| Pk # | Retention Time | Area Percent |
|------|----------------|--------------|
| 1    | 20.216         | 5.920        |
| 2    | 25.192         | 94.080       |

|        |  |         |
|--------|--|---------|
| Totals |  | 100.000 |
|--------|--|---------|

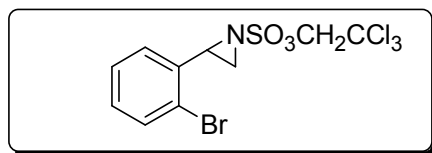

**2-(2-Bromo-phenyl)-aziridine-1-sulfonic acid 2,2,2-trichloro-ethyl ester**

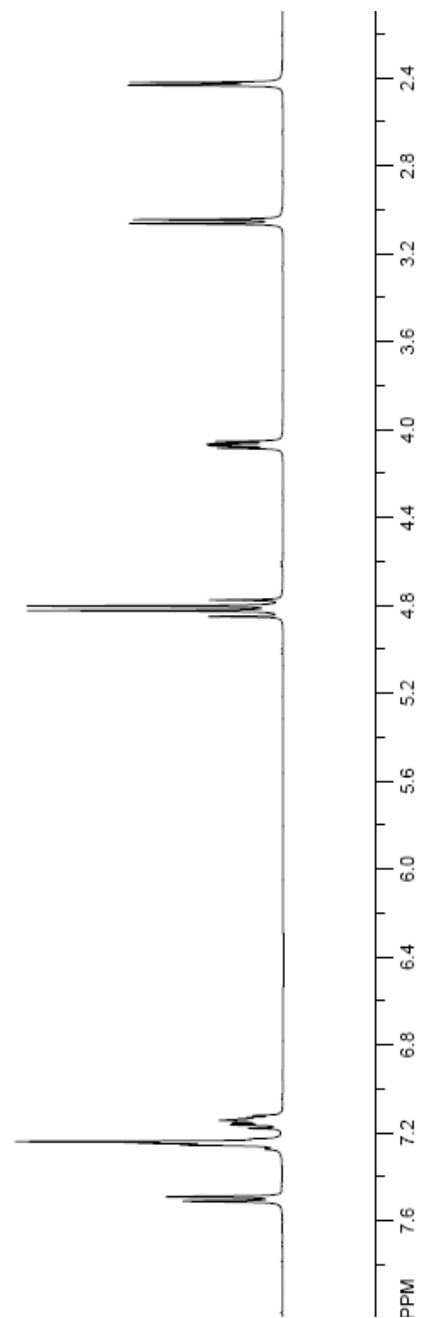

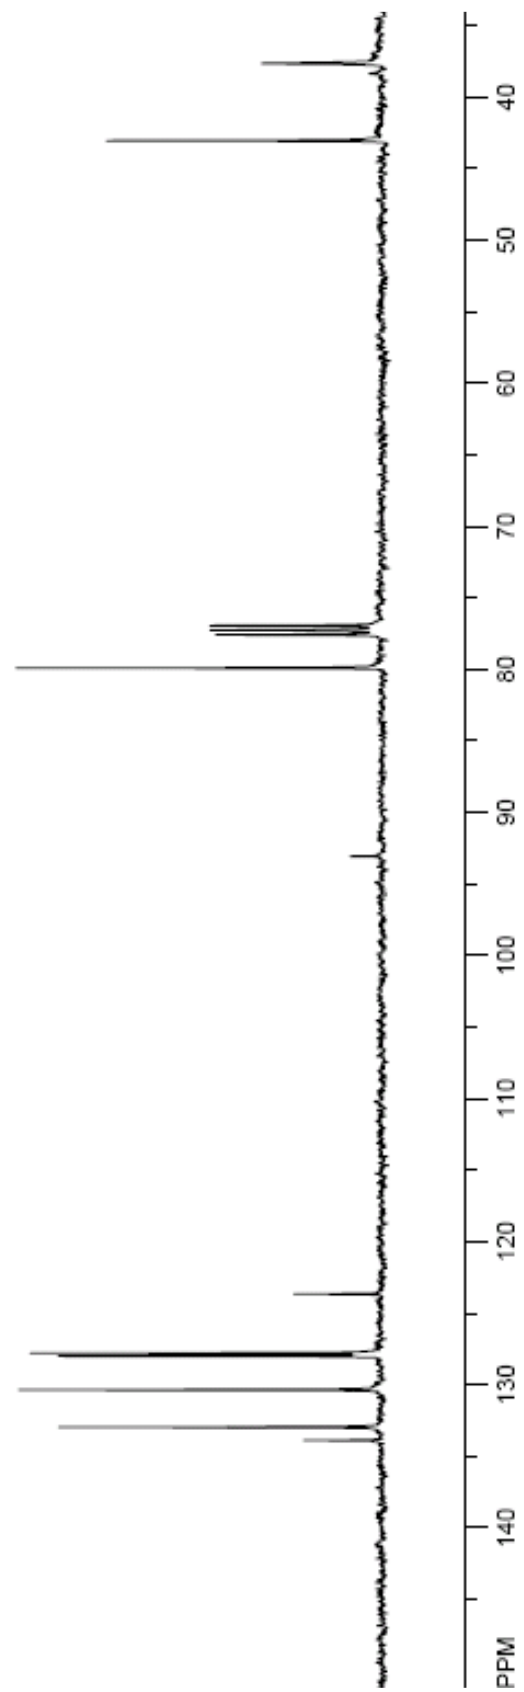

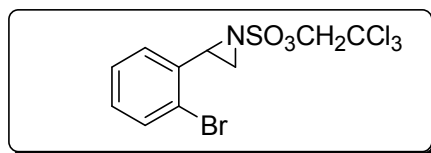

## 2-(2-Bromo-phenyl)-aziridine-1-sulfonic acid 2,2,2-trichloro-ethyl ester

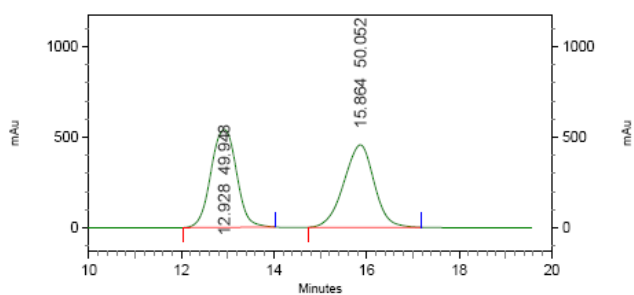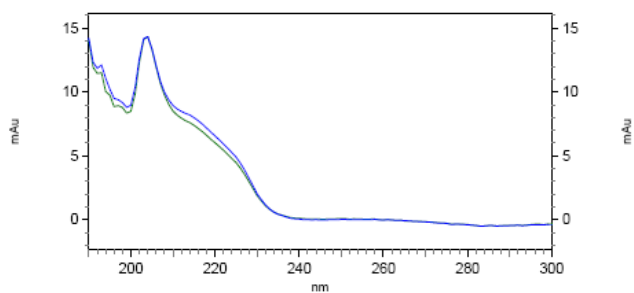

2: 225 nm, 4 nm

Results

| Name | Retention Time | Area Percent | Pk # |
|------|----------------|--------------|------|
|      | 12.928         | 49.948       | 1    |
|      | 15.864         | 50.052       | 2    |

|        |  |         |  |
|--------|--|---------|--|
| Totals |  | 100.000 |  |
|--------|--|---------|--|





## 2-(2-Bromo-phenyl)-aziridine-1-sulfonic acid 2,2,2-trichloro-ethyl ester

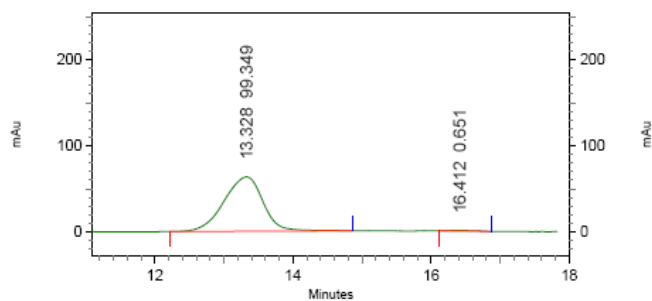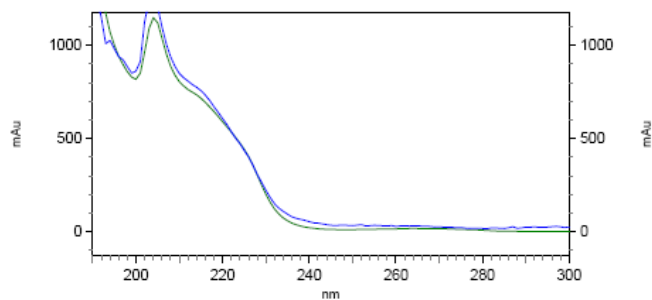

1: 234 nm, 4 nm

Results

| Name   | Retention Time | Area Percent | Pk # |
|--------|----------------|--------------|------|
|        | 13.328         | 99.349       | 1    |
|        | 16.412         | 0.651        | 2    |
| Totals |                | 100.000      |      |

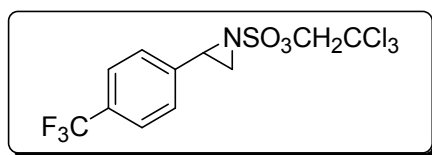

**2-(4-Trifluoromethyl-phenyl)-aziridine-1-sulfonic acid 2,2,2-trichloro-ethyl ester**

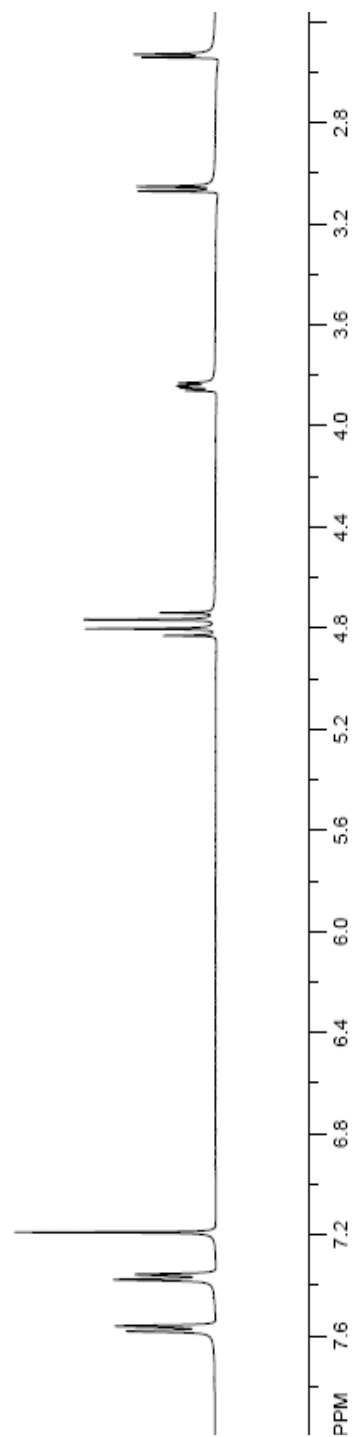

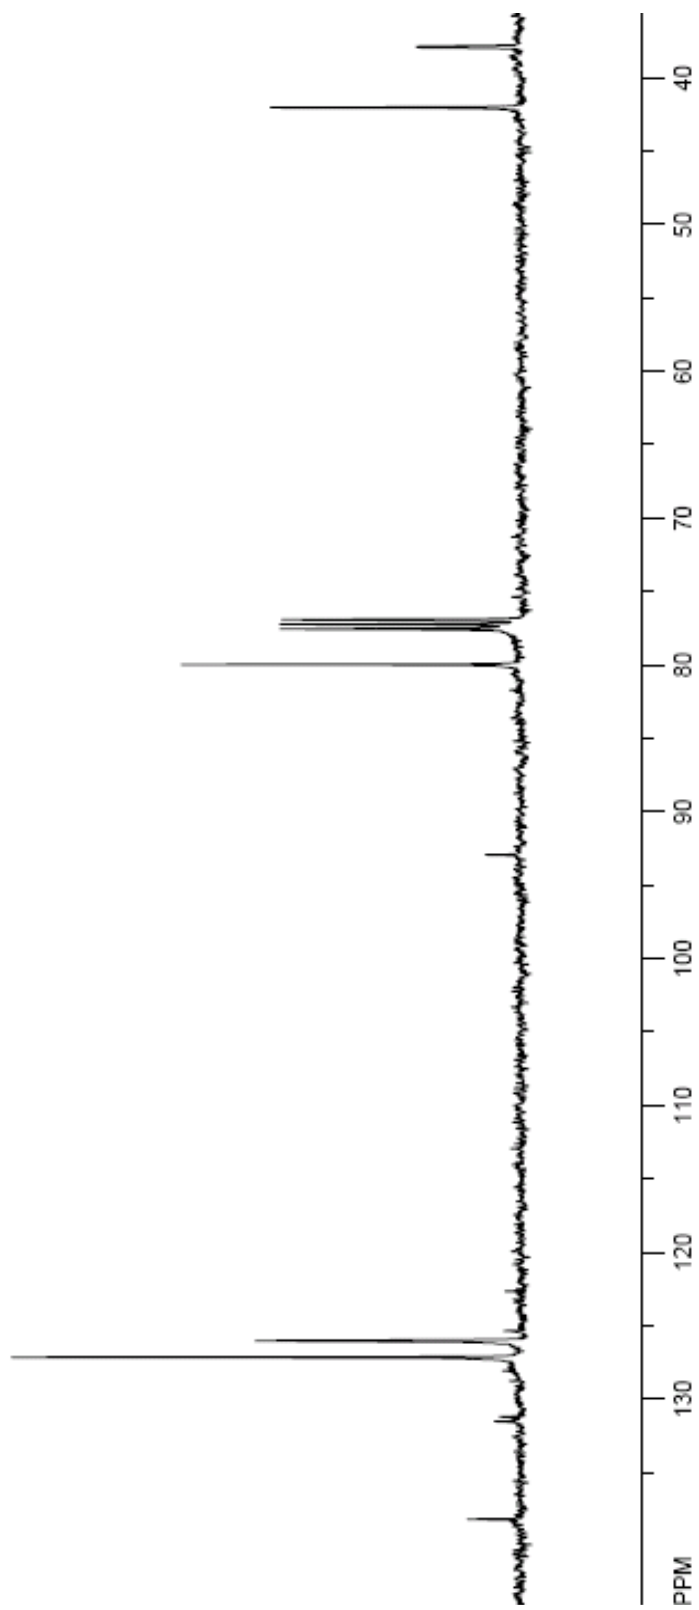

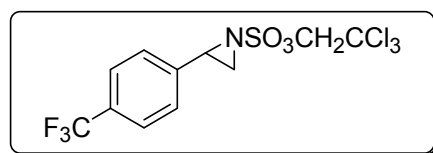

## 2-(4-Trifluoromethyl-phenyl)-aziridine-1-sulfonic acid 2,2,2-trichloro-ethyl ester

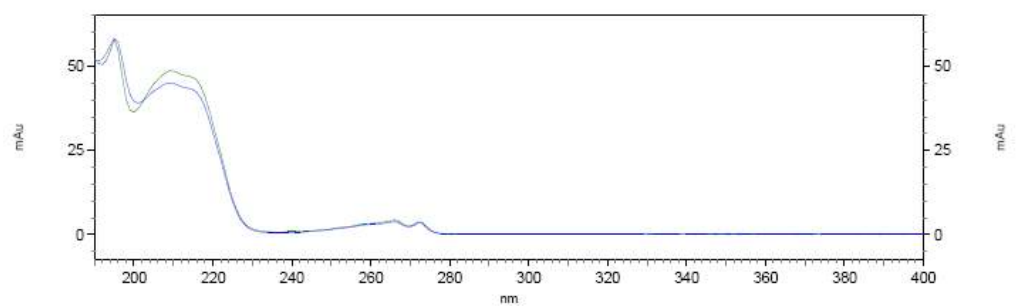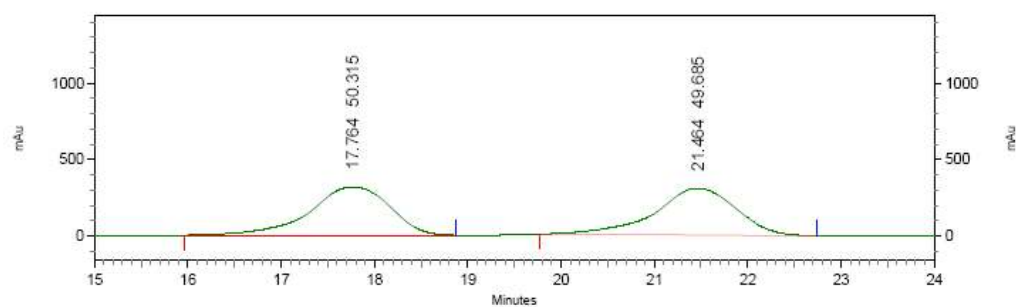

1: 225 nm, 4 nm Results

| Pk #   | Retention Time | Area Percent |
|--------|----------------|--------------|
| 1      | 17.764         | 50.315       |
| 2      | 21.464         | 49.685       |
| Totals |                | 100.000      |

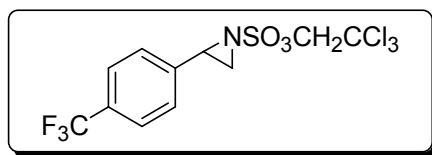

**2-(4-Trifluoromethyl-phenyl)-aziridine-1-sulfonic acid 2,2,2-trichloro-ethyl ester**

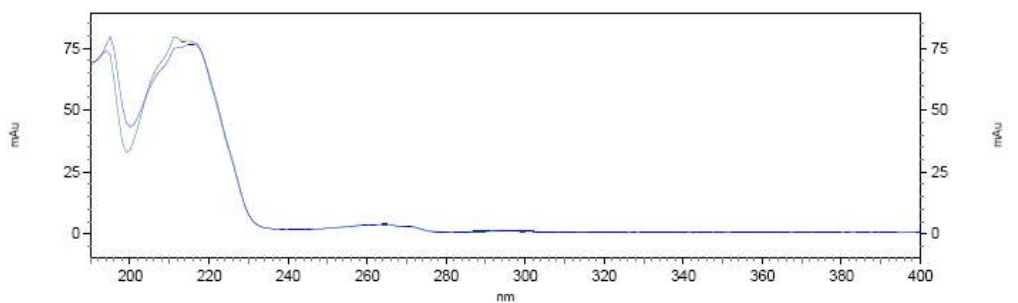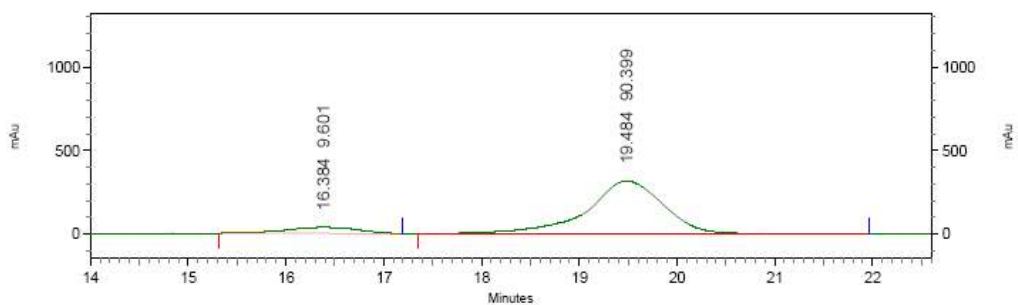

1: 225 nm, 4 nm Results

| Pk # | Retention Time | Area Percent |
|------|----------------|--------------|
| 1    | 16.384         | 9.601        |
| 2    | 19.484         | 90.399       |

|        |         |
|--------|---------|
| Totals | 100.000 |
|--------|---------|

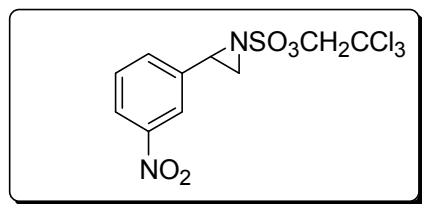

**2-(3-Nitro-phenyl)-aziridine-1-sulfonic acid 2,2,2-trichloro-ethyl ester**

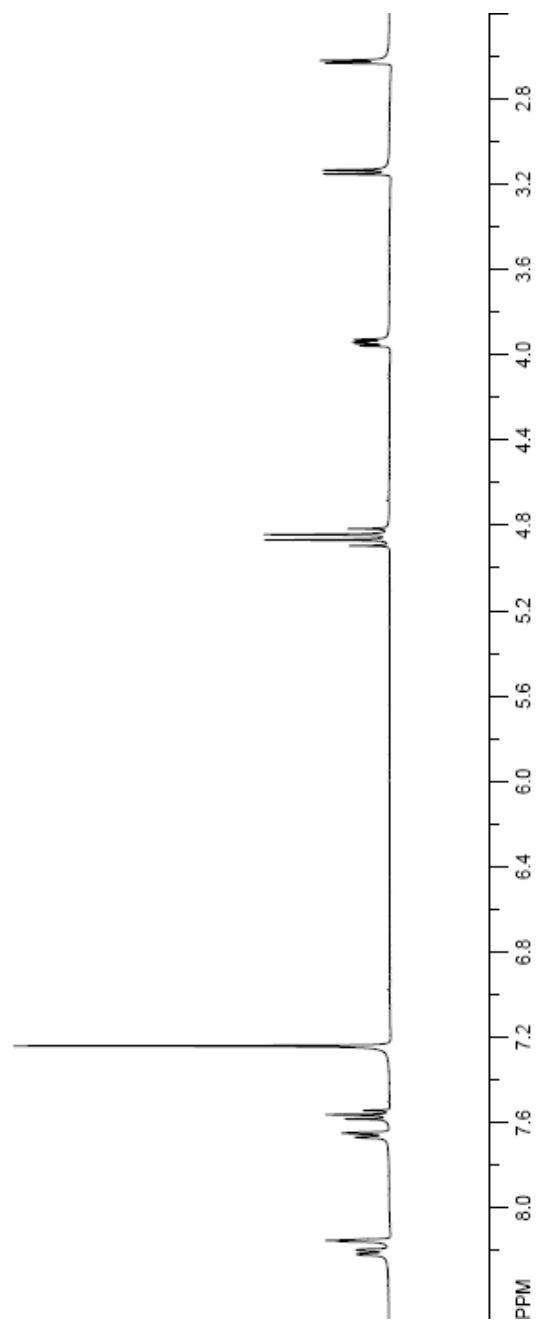

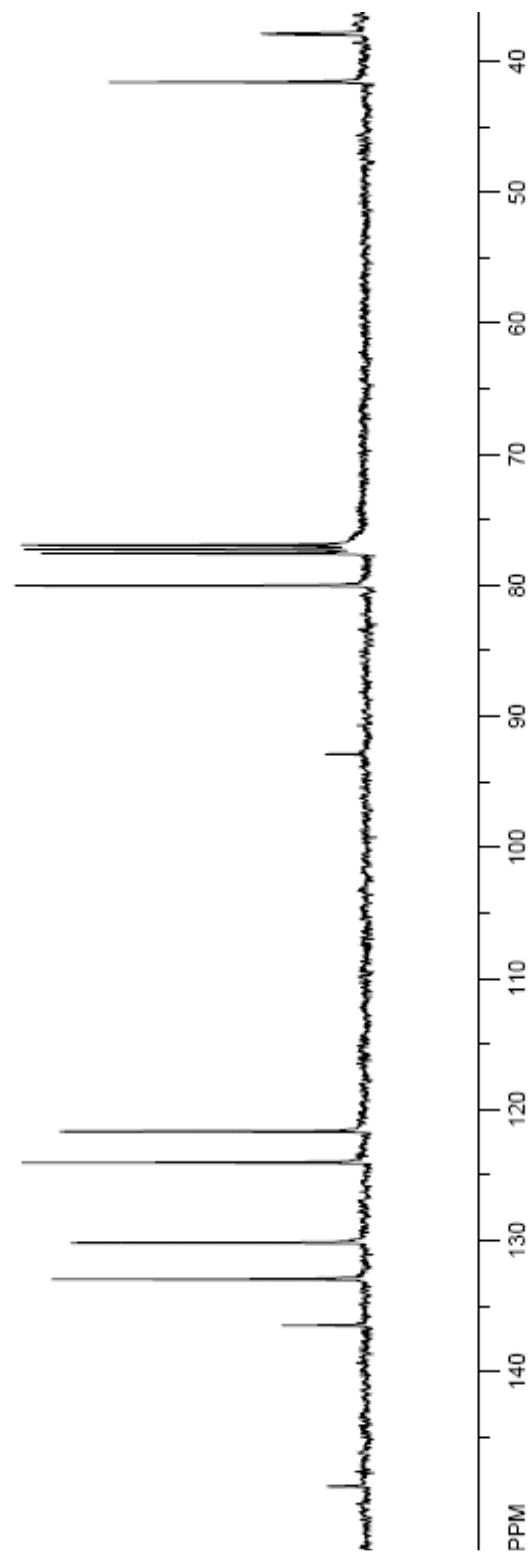

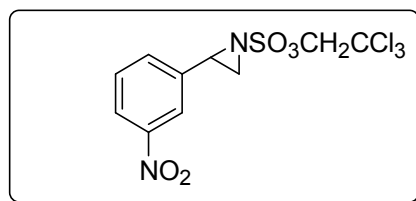

### 2-(3-Nitro-phenyl)-aziridine-1-sulfonic acid 2,2,2-trichloro-ethyl ester

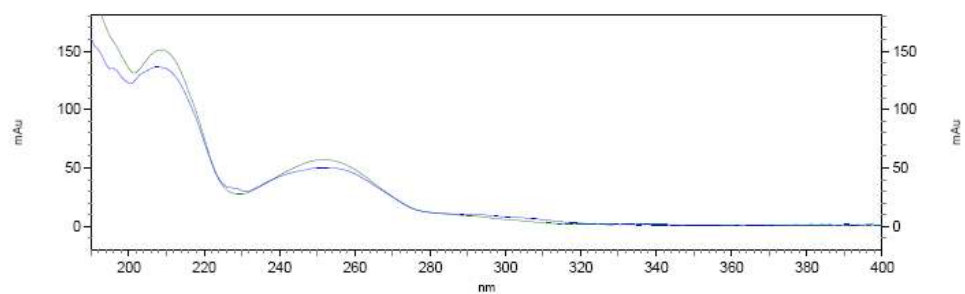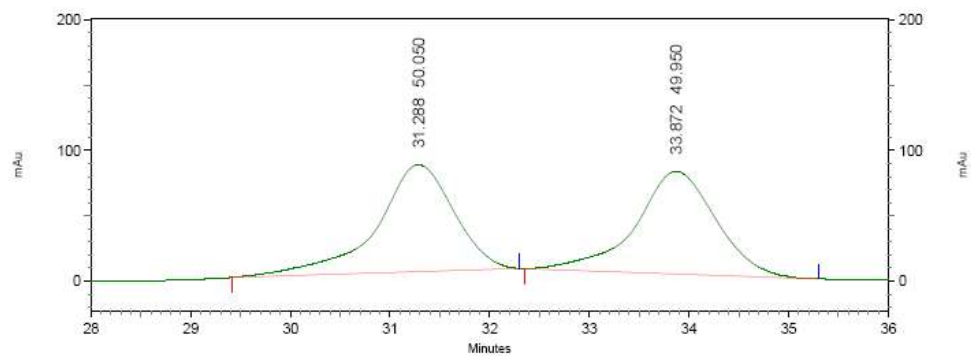

1: 260 nm, 4 nm Results

| Pk # | Retention Time | Area Percent |
|------|----------------|--------------|
| 1    | 31.288         | 50.050       |
| 2    | 33.872         | 49.950       |

|        |  |         |
|--------|--|---------|
| Totals |  | 100.000 |
|--------|--|---------|



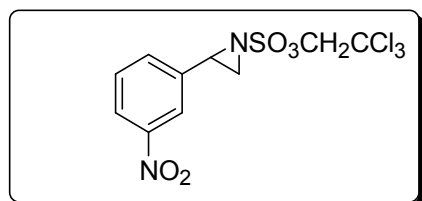

**2-(3-Nitro-phenyl)-aziridine-1-sulfonic acid 2,2,2-trichloro-ethyl ester**

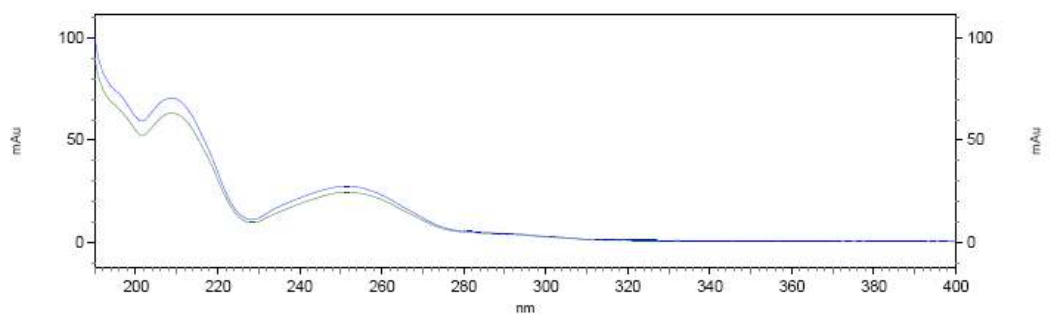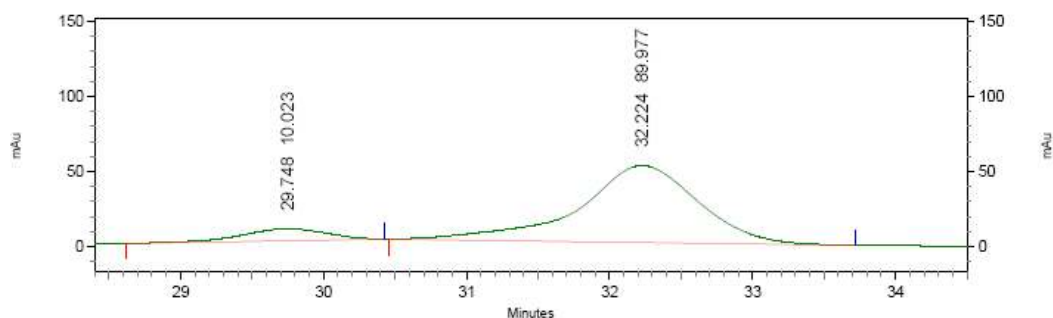

1: 260 nm, 4 nm Results

| Pk # | Retention Time | Area Percent |
|------|----------------|--------------|
| 1    | 29.748         | 10.023       |
| 2    | 32.224         | 89.977       |

|        |         |
|--------|---------|
| Totals | 100.000 |
|--------|---------|

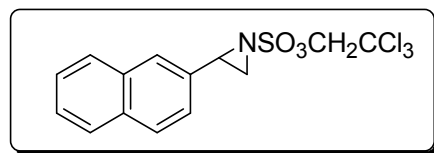

**2-Naphthalene-2yl-aziridine-1-sulfonic acid 2,2,2-trichloro-ethyl ester**

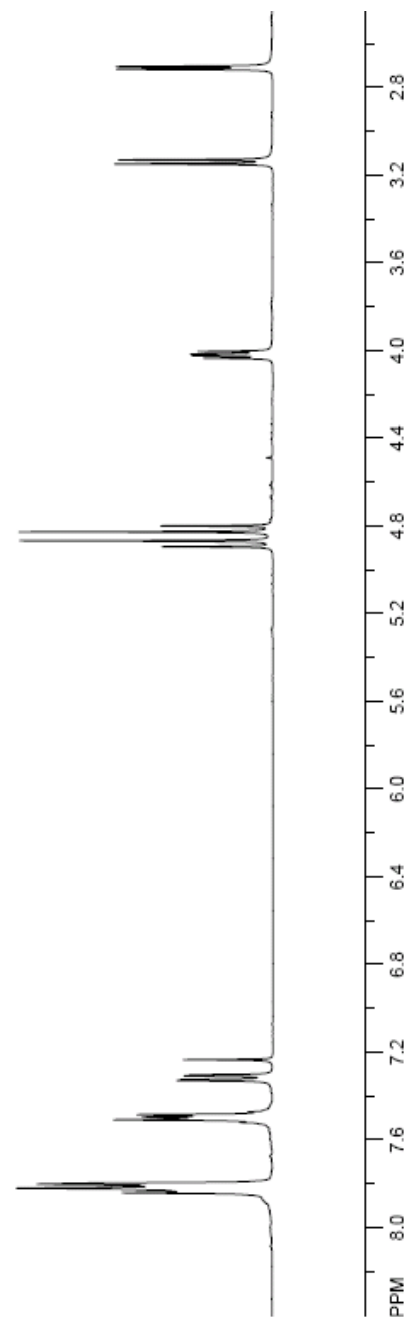

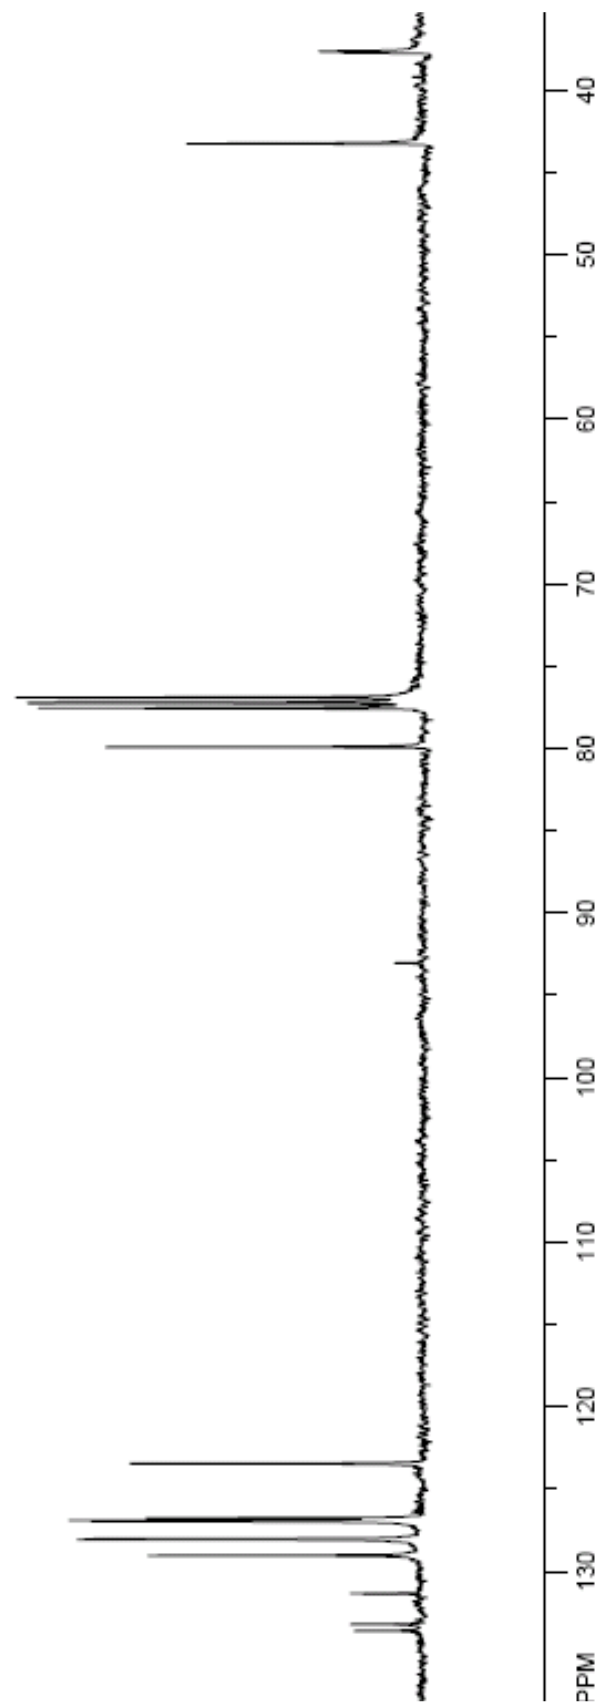

SS57

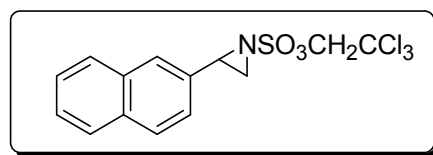

## 2-Napthalene-2-yl-aziridine-1-sulfonic acid 2,2,2-trichloro-ethyl ester

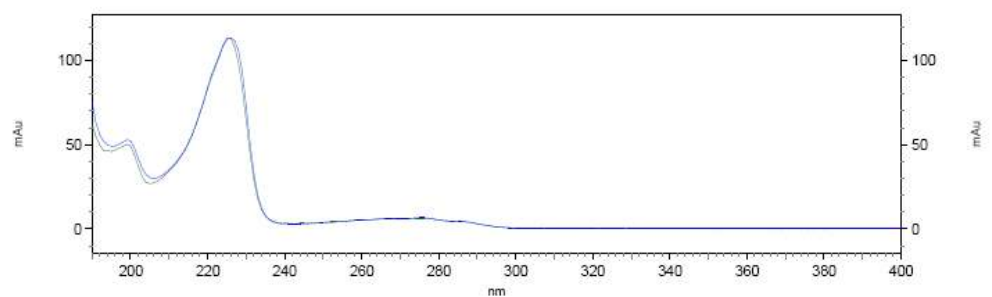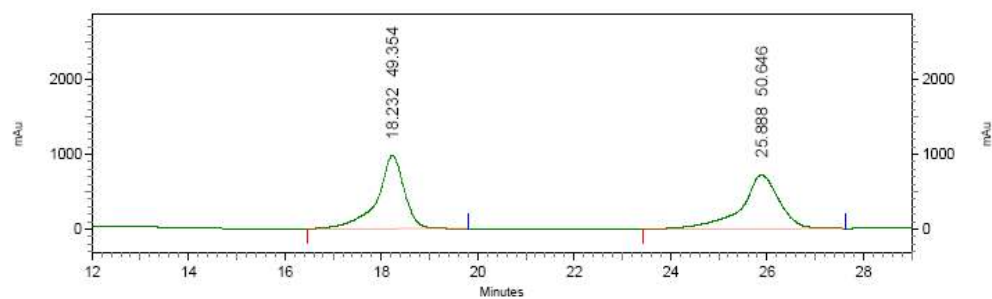

1: 210 nm, 4 nm Results

| Pk # | Retention Time | Area Percent |
|------|----------------|--------------|
| 1    | 18.232         | 49.354       |
| 2    | 25.888         | 50.646       |

|        |         |
|--------|---------|
| Totals | 100.000 |
|--------|---------|

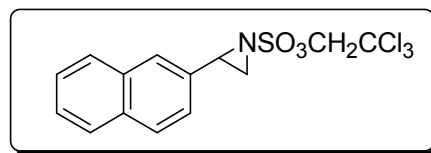

## 2-Naphthalene-2yl-aziridine-1-sulfonic acid 2,2,2-trichloro-ethyl ester

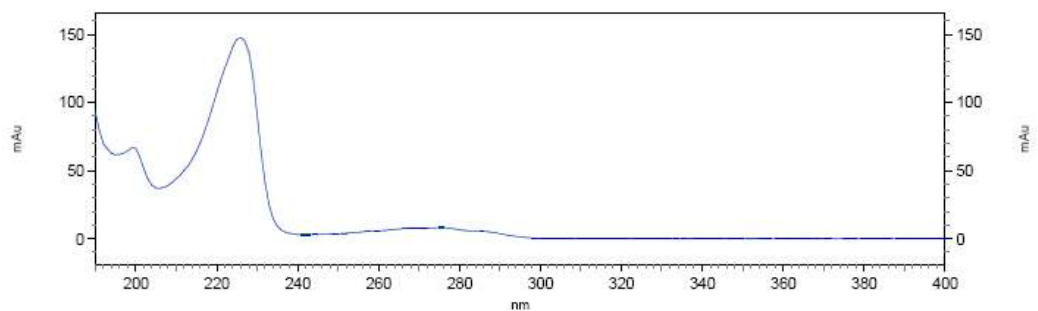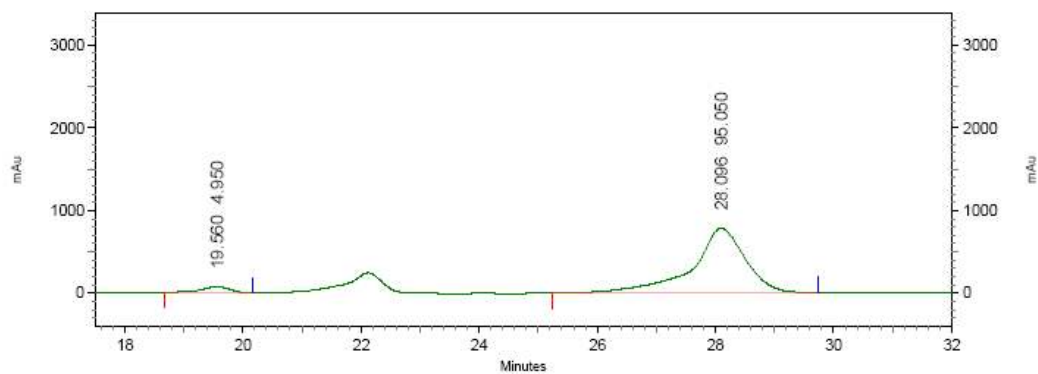

1: 207 nm, 4 nm Results

| Pk #   | Retention Time | Area Percent |
|--------|----------------|--------------|
| 1      | 19.560         | 4.950        |
| 2      | 28.096         | 95.050       |
| Totals |                | 100.000      |

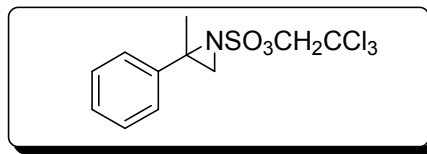

SpinWorks 2.5: SV-V-213\_16May2008

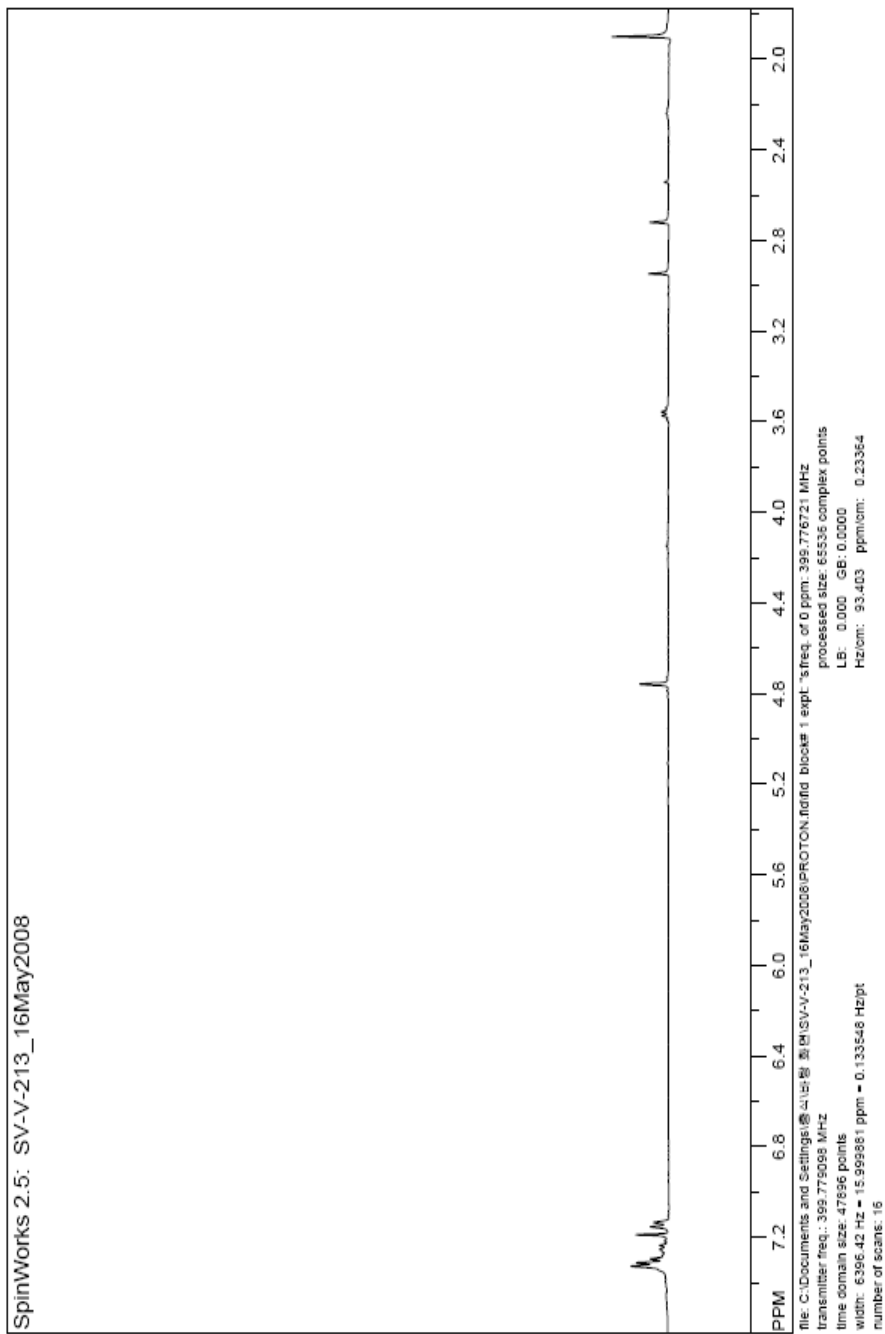

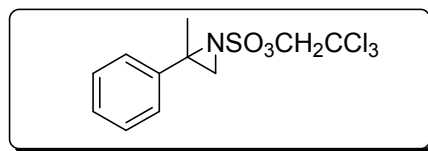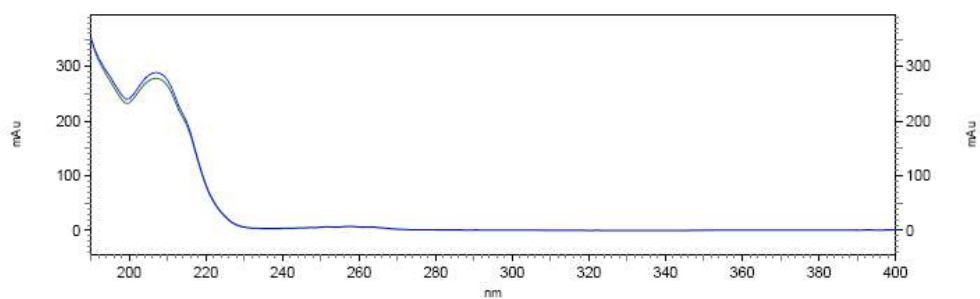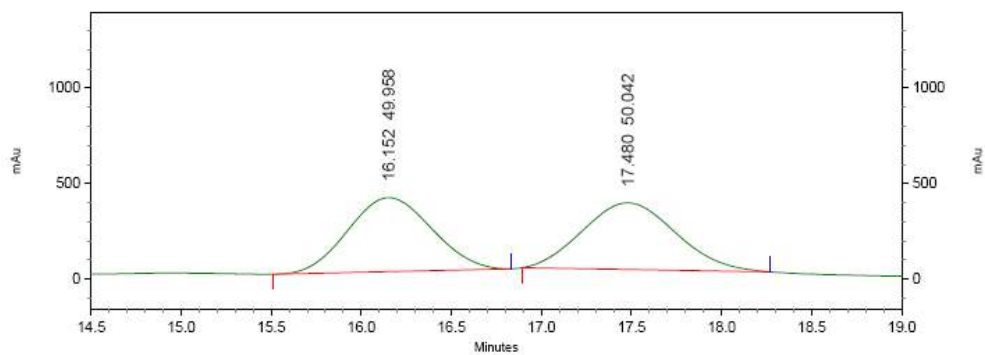

1: 224 nm, 4 nm Results

| Pk # | Retention Time | Area Percent |
|------|----------------|--------------|
| 1    | 16.152         | 49.958       |
| 2    | 17.480         | 50.042       |

|        |  |         |
|--------|--|---------|
| Totals |  | 100.000 |
|--------|--|---------|

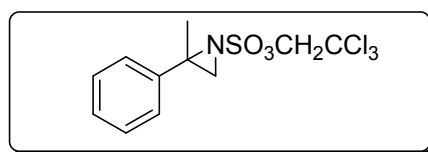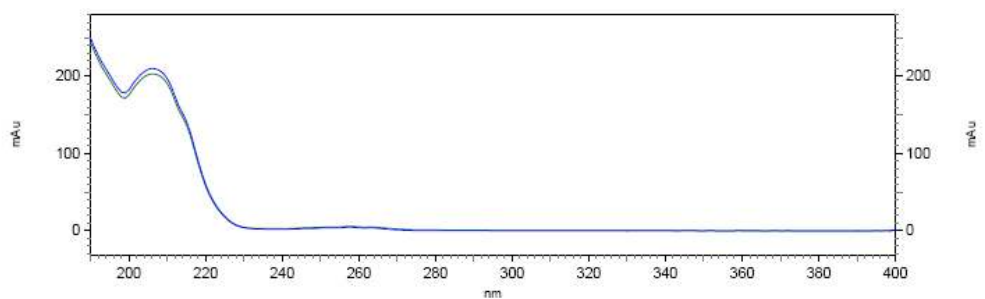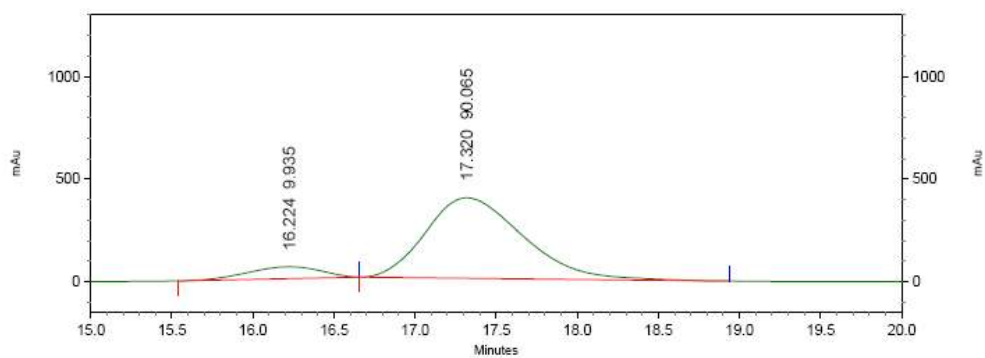

1: 224 nm, 4 nm Results

| Pk #   | Retention Time | Area Percent |
|--------|----------------|--------------|
| 1      | 16.224         | 9.935        |
| 2      | 17.320         | 90.065       |
| Totals |                | 100.000      |



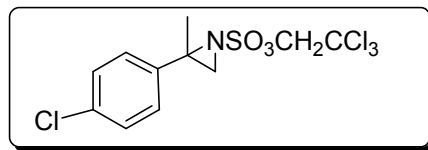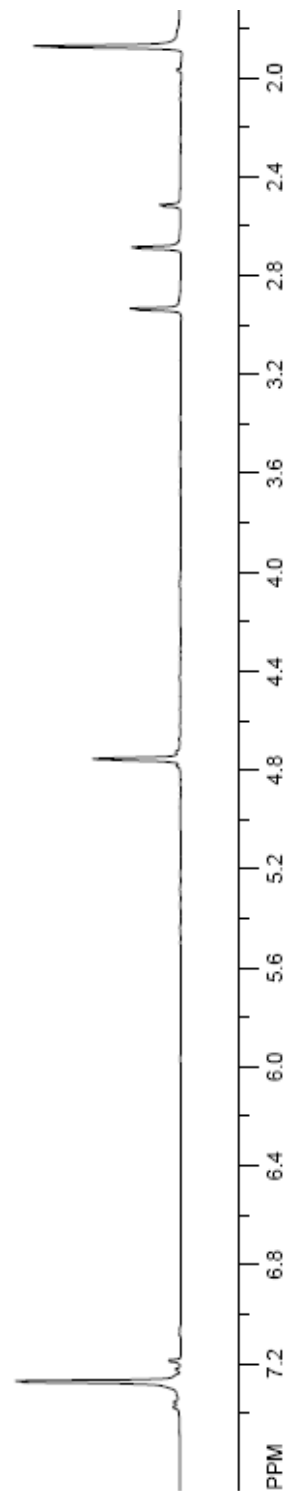

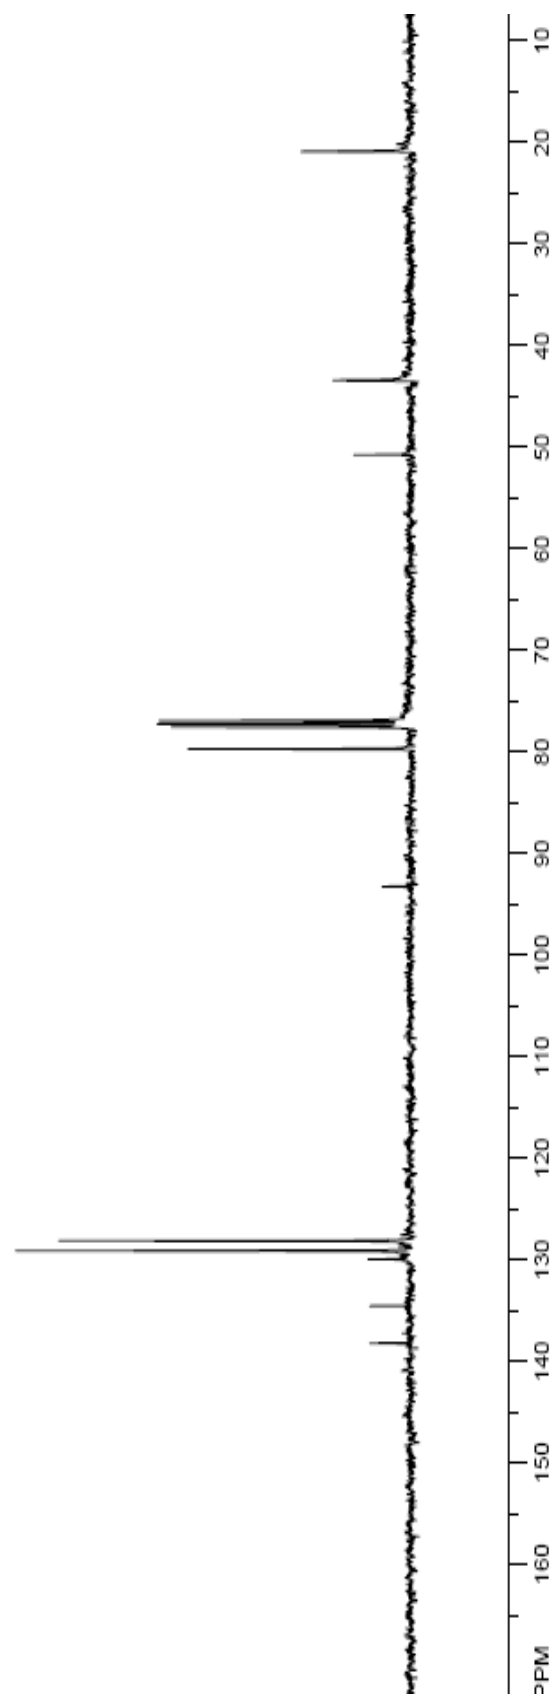

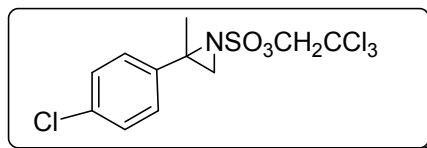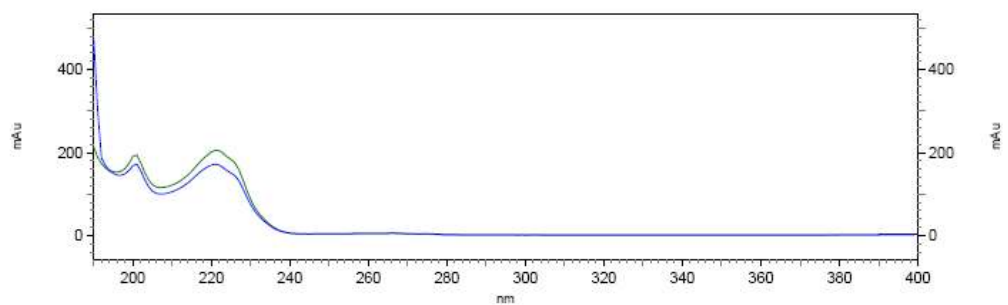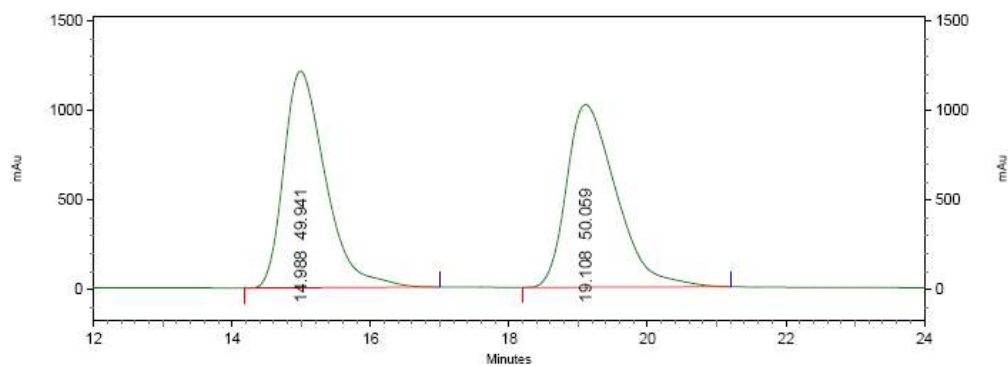

1: 234 nm, 4 nm Results

| Pk #   | Retention Time | Area Percent |
|--------|----------------|--------------|
| 1      | 14.988         | 49.941       |
| 2      | 19.108         | 50.059       |
| Totals |                | 100.000      |

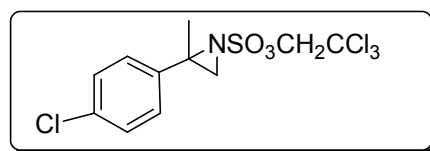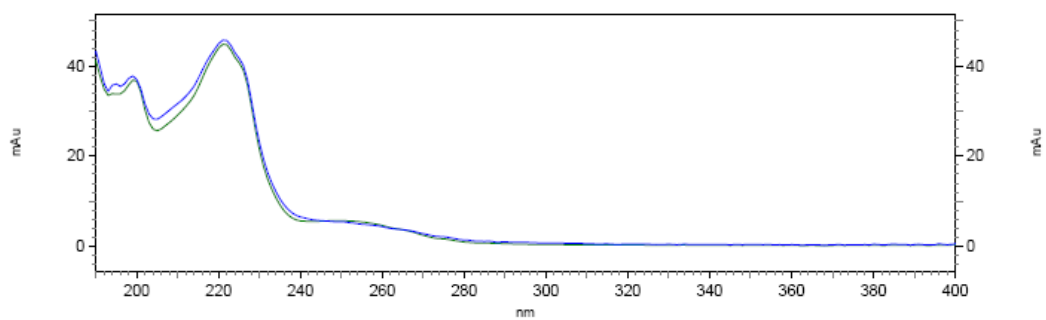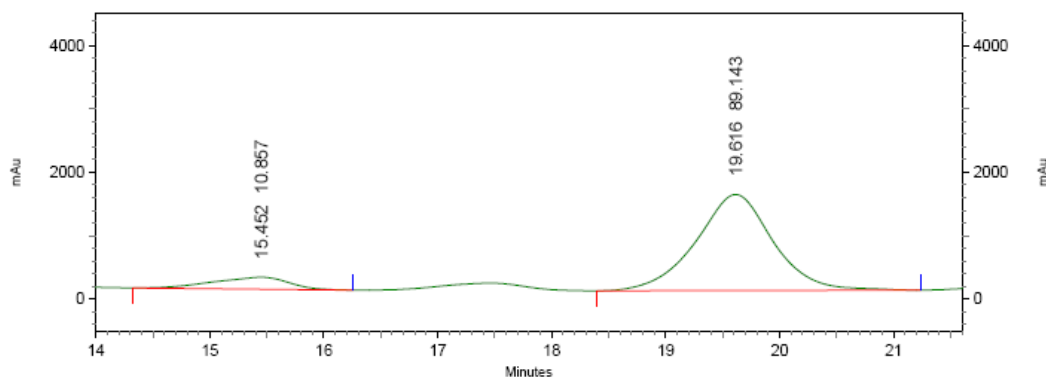

1: 234 nm, 4 nm Results

| Pk #   | Retention Time | Area Percent |
|--------|----------------|--------------|
| 1      | 15.452         | 10.857       |
| 2      | 19.616         | 89.143       |
| Totals |                | 100.000      |

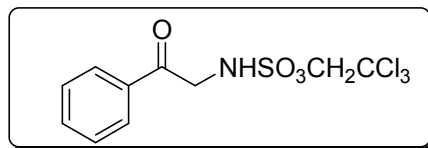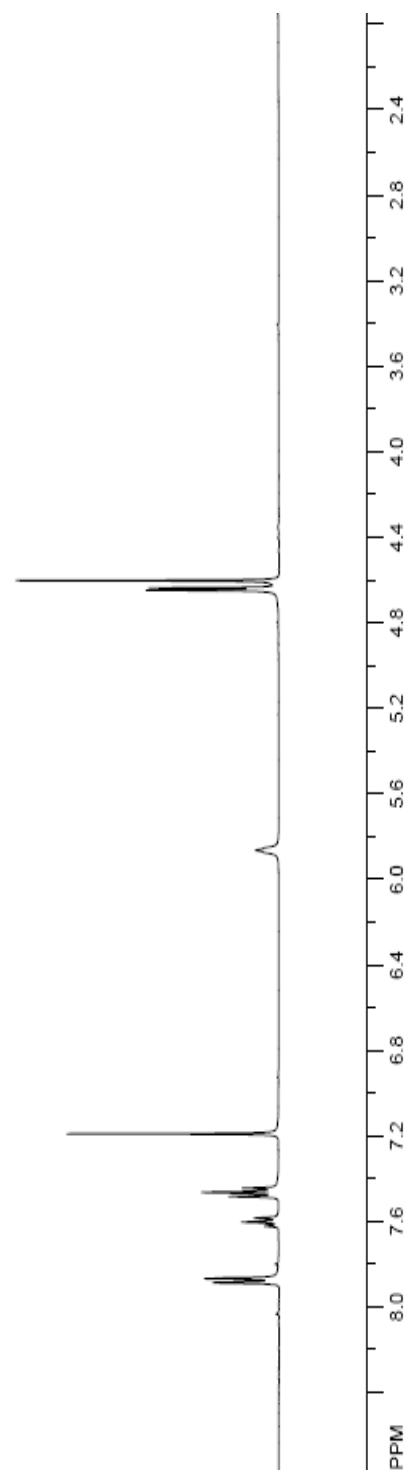

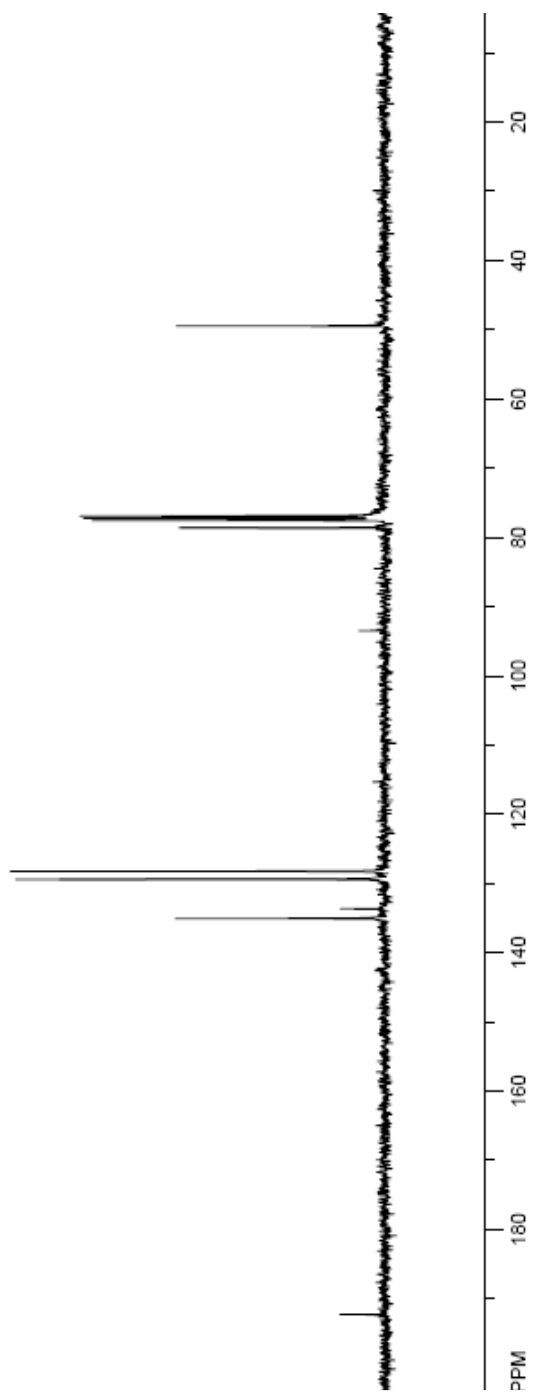

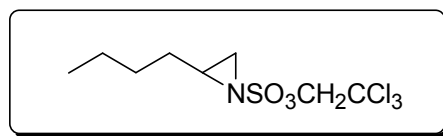

### 2-Butyl-aziridine-1-sulfonic acid 2,2,2-trichloro-ethyl ester

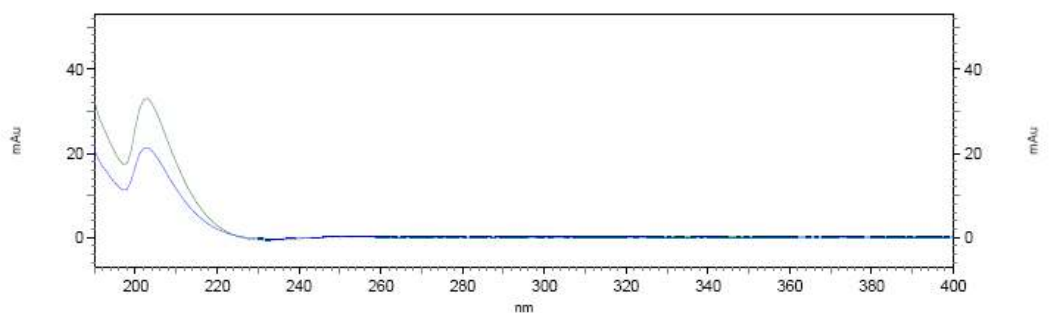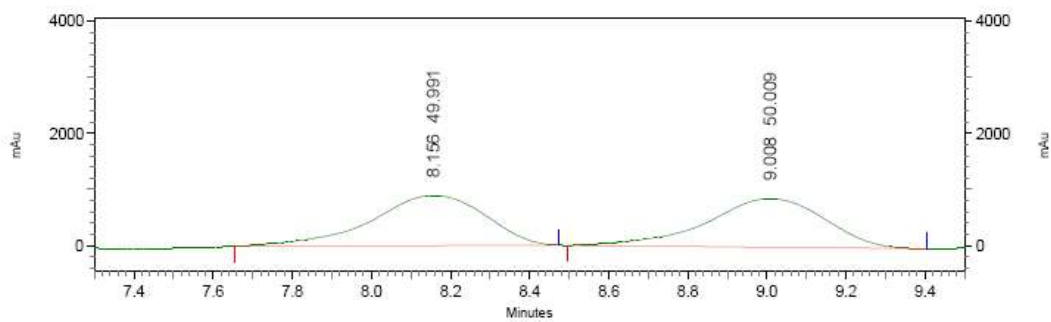

1: 204 nm, 4 nm Results

| Pk #   | Retention Time | Area Percent |
|--------|----------------|--------------|
| 1      | 8.156          | 49.991       |
| 2      | 9.008          | 50.009       |
| Totals |                | 100.000      |

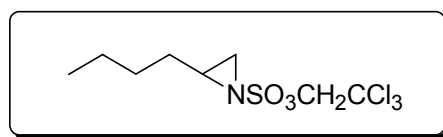

### 2-Butyl-aziridine-1-sulfonic acid 2,2,2-trichloro-ethyl ester

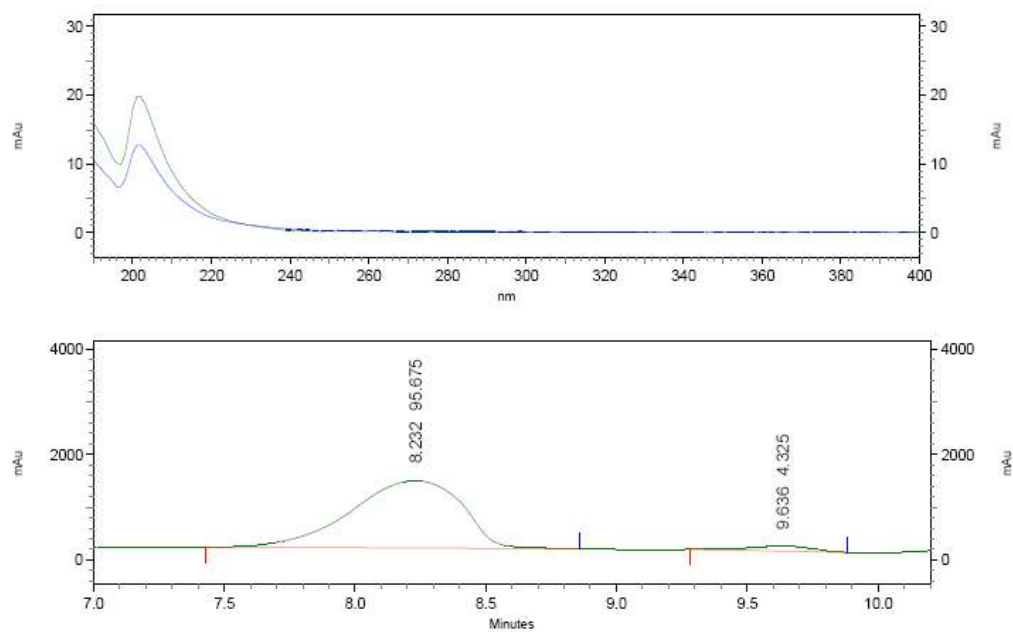

1: 204 nm, 4 nm Results

| Pk # | Retention Time | Area Percent |
|------|----------------|--------------|
| 1    | 8.232          | 95.675       |
| 2    | 9.636          | 4.325        |

|        |  |         |
|--------|--|---------|
| Totals |  | 100.000 |
|--------|--|---------|



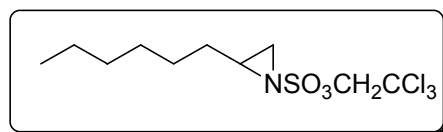

### 2-hexyl-aziridine-1-sulfonic acid 2,2,2-trichloro-ethyl ester

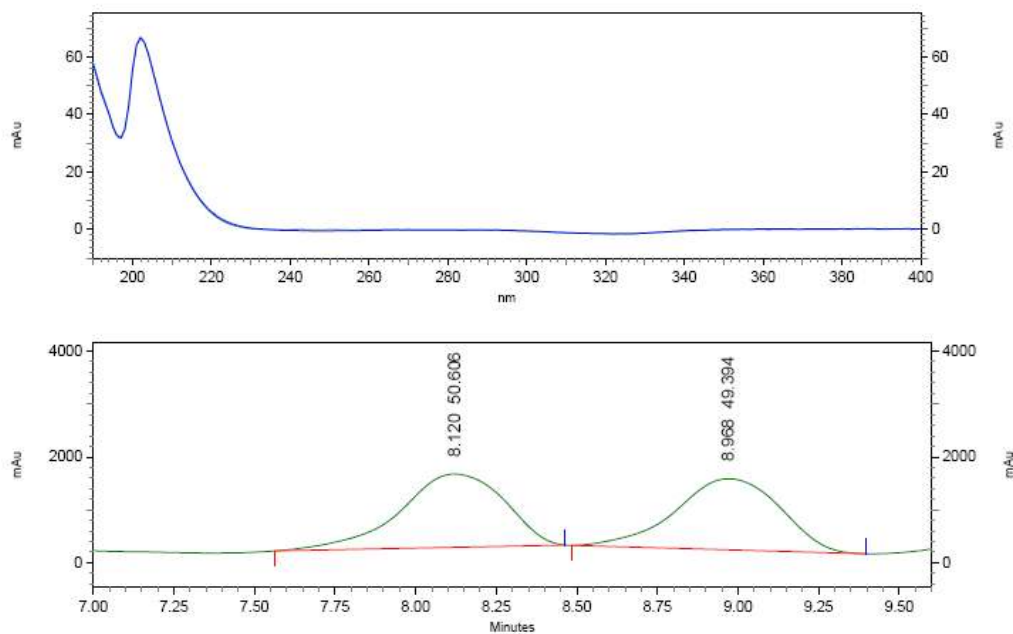

1: 205 nm, 4 nm Results

| Pk # | Retention Time | Area Percent |
|------|----------------|--------------|
| 1    | 8.120          | 50.606       |
| 2    | 8.968          | 49.394       |

|        |  |         |
|--------|--|---------|
| Totals |  | 100.000 |
|--------|--|---------|

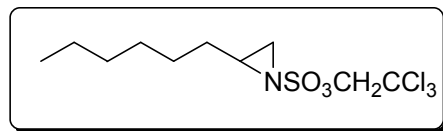

### 2-hexyl-aziridine-1-sulfonic acid 2,2,2-trichloro-ethyl ester

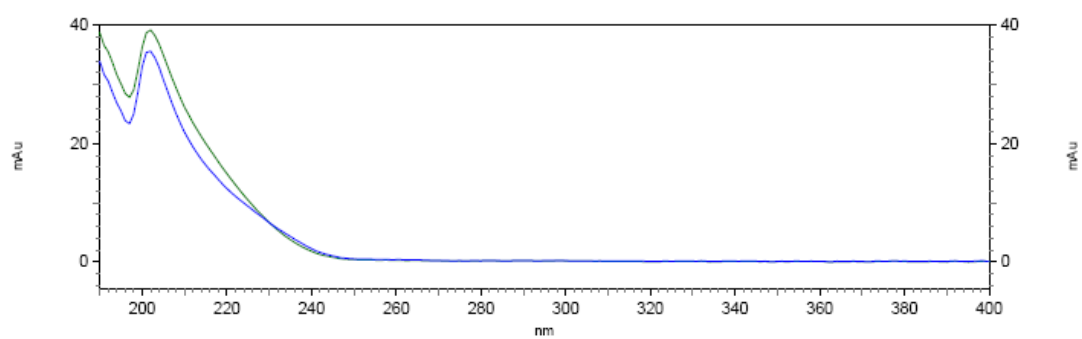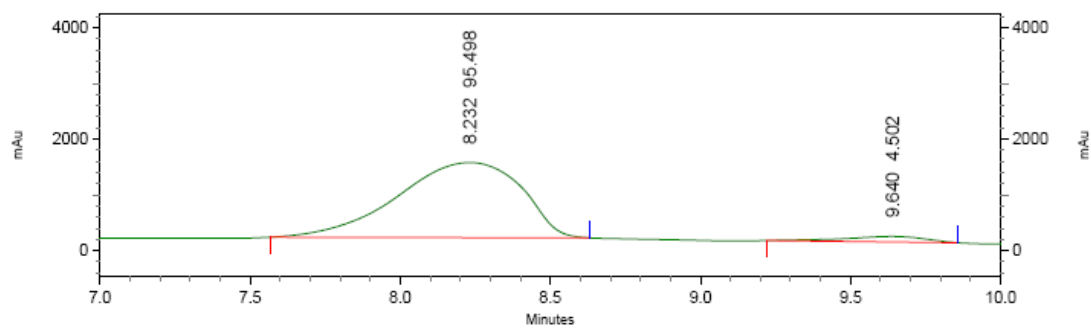

1: 205 nm, 4 nm Results

| Pk #   | Retention Time | Area Percent |
|--------|----------------|--------------|
| 1      | 8.232          | 95.498       |
| 2      | 9.640          | 4.502        |
| Totals |                | 100.000      |

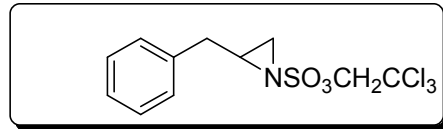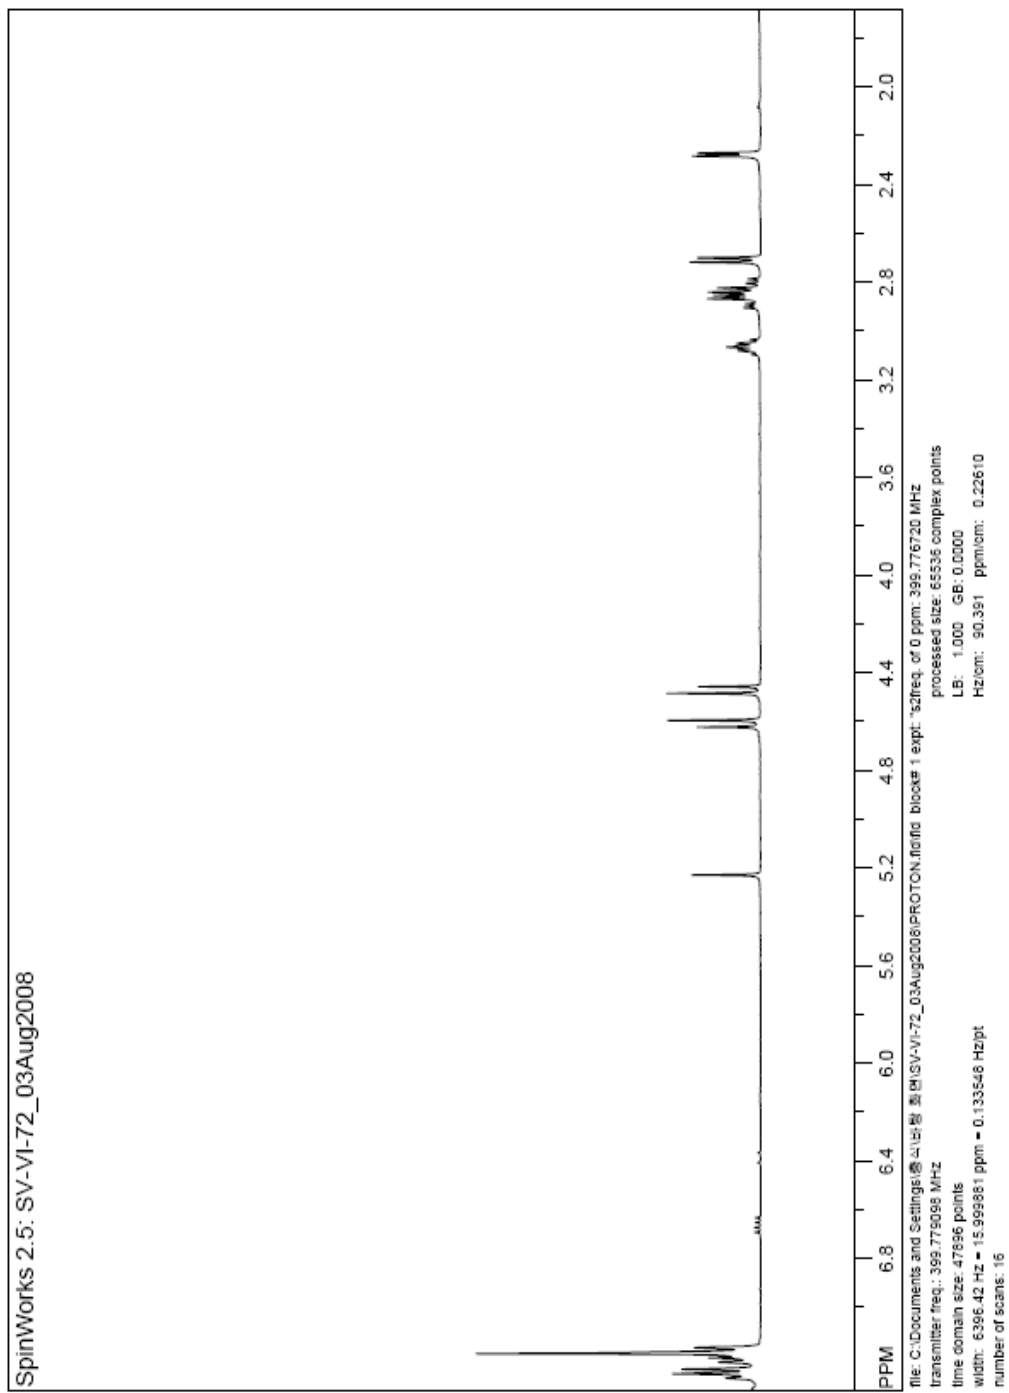

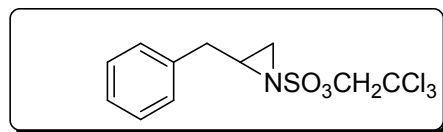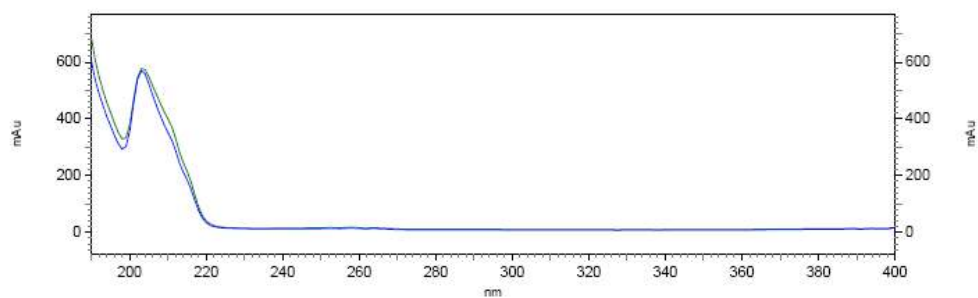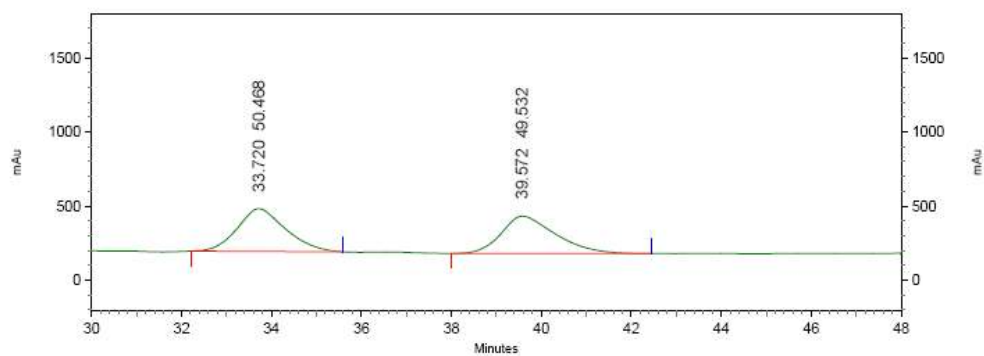

1: 220 nm, 4 nm Results

| Pk #   | Retention Time | Area Percent |
|--------|----------------|--------------|
| 1      | 33.720         | 50.468       |
| 2      | 39.572         | 49.532       |
| Totals |                | 100.000      |

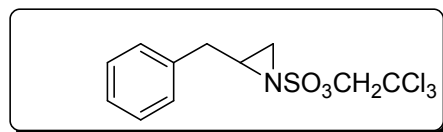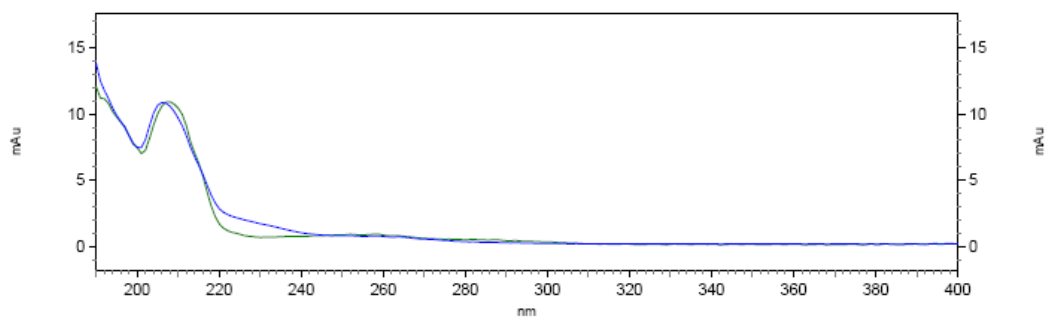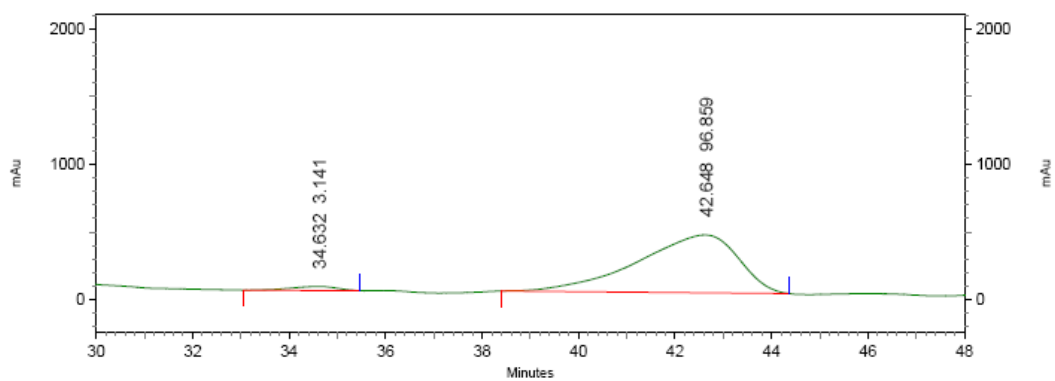

1: 221 nm, 4 nm Results

| Pk #   | Retention Time | Area Percent |
|--------|----------------|--------------|
| 1      | 34.632         | 3.141        |
| 2      | 42.648         | 96.859       |
| Totals |                | 100.000      |

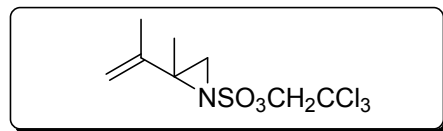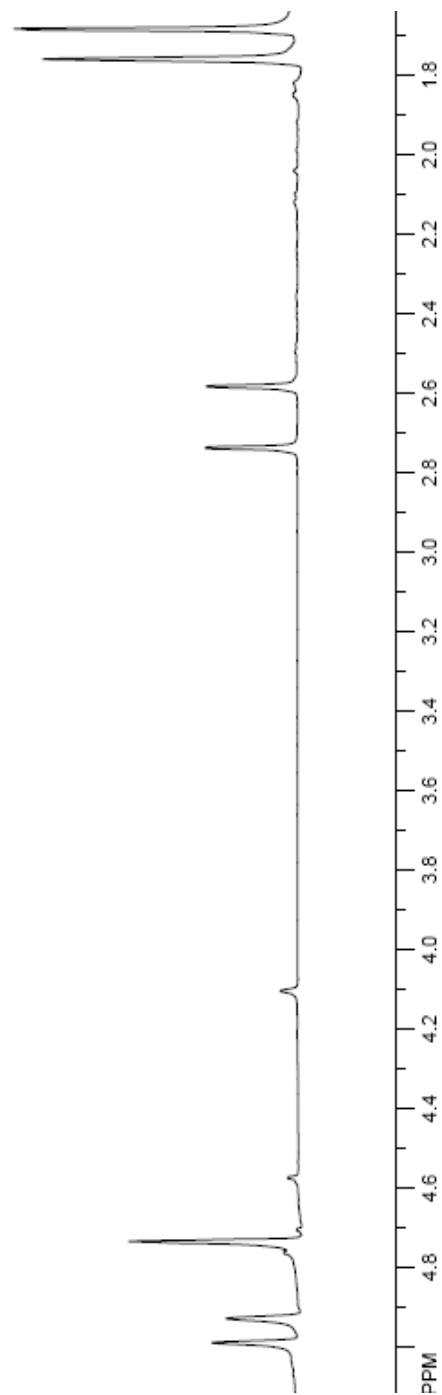

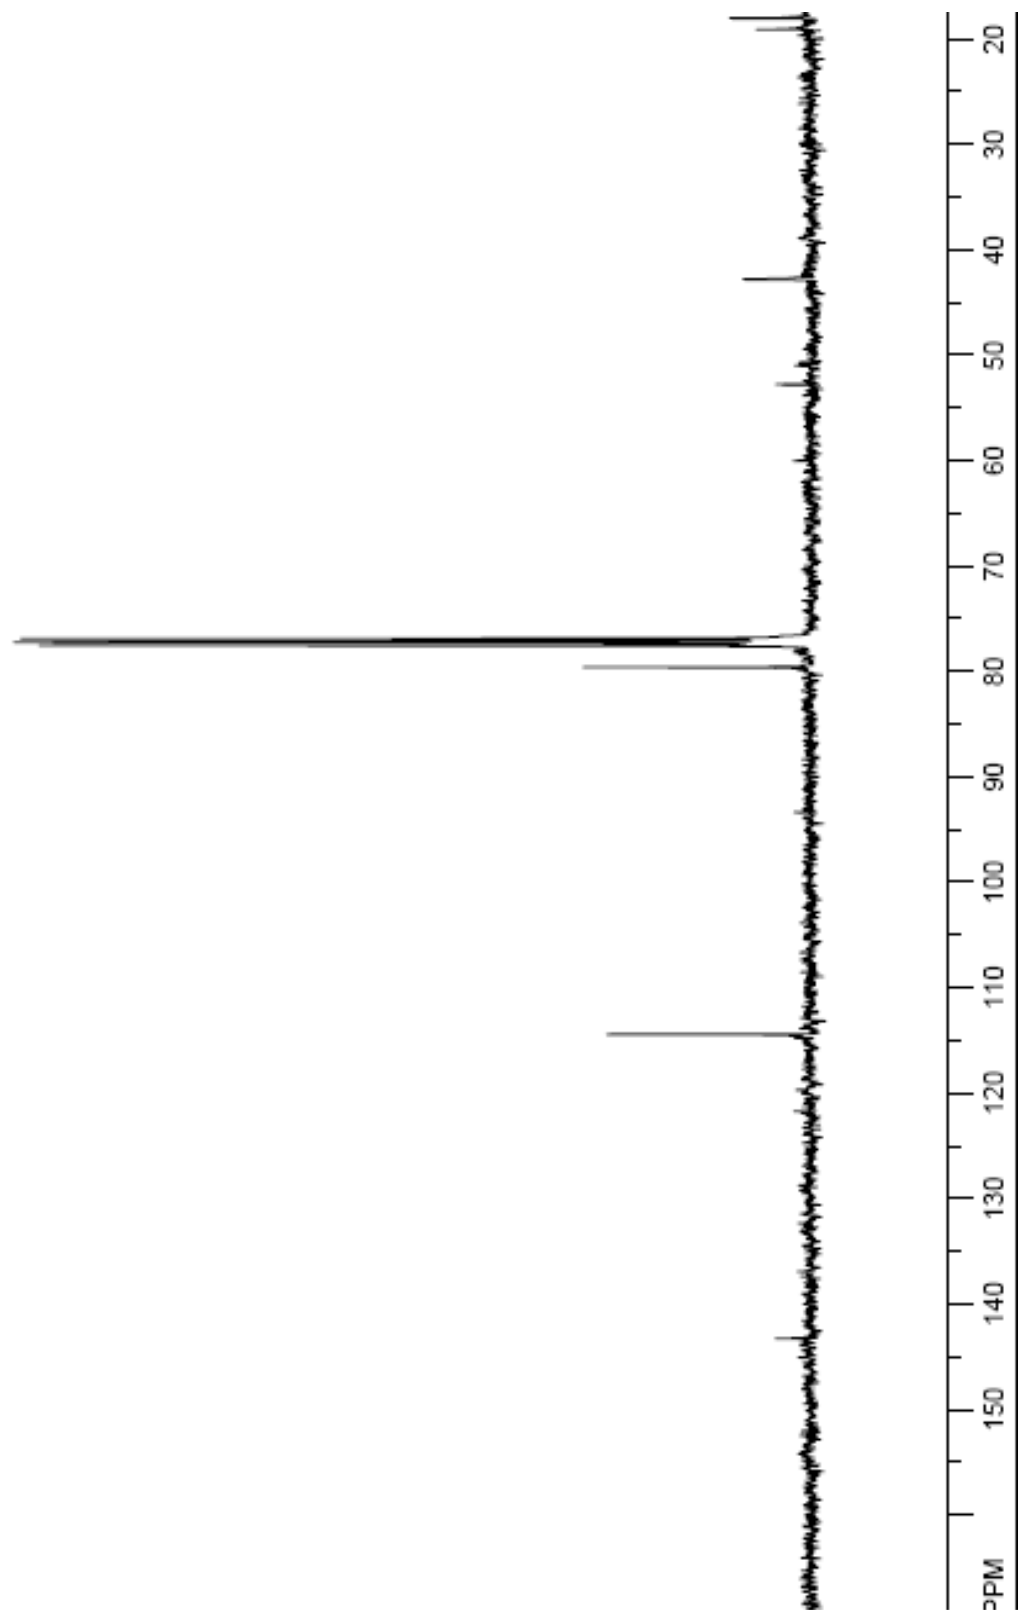

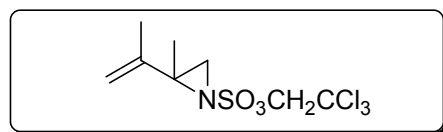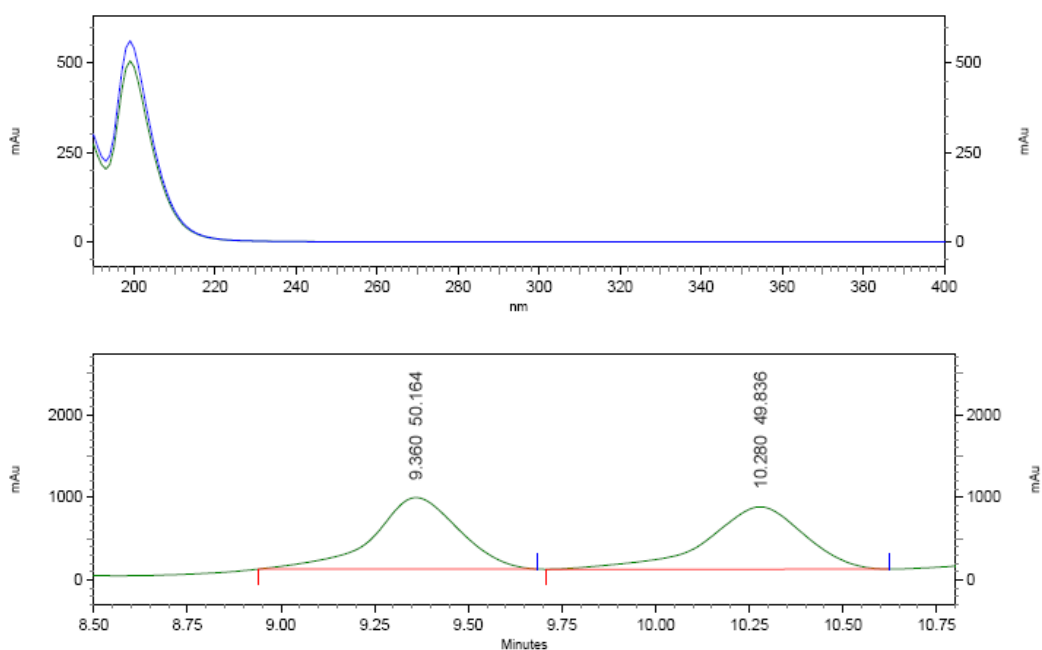

1: 213 nm, 4 nm Results

| Pk #   | Retention Time | Area Percent |
|--------|----------------|--------------|
| 1      | 9.360          | 50.164       |
| 2      | 10.280         | 49.836       |
| Totals |                | 100.000      |



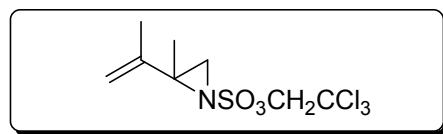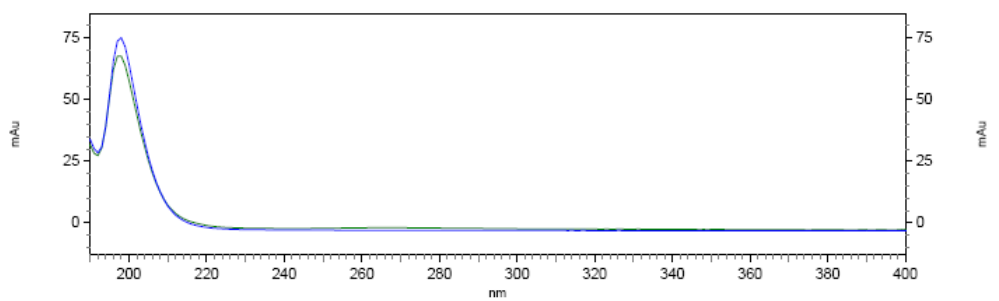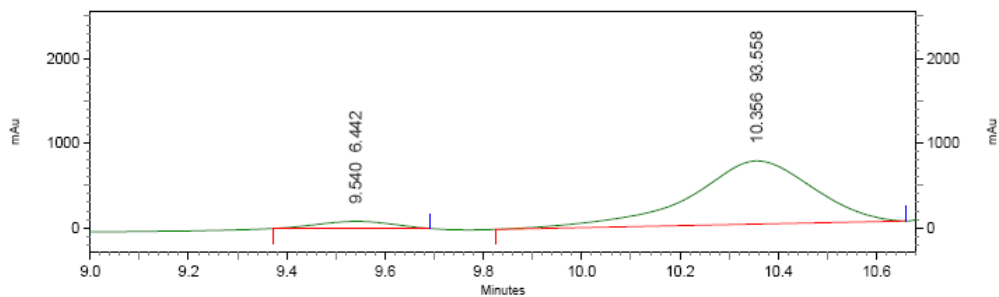

1: 214 nm, 4 nm Results

| Pk # | Retention Time | Area Percent |
|------|----------------|--------------|
| 1    | 9.540          | 6.442        |
| 2    | 10.356         | 93.558       |

|        |  |         |
|--------|--|---------|
| Totals |  | 100.000 |
|--------|--|---------|

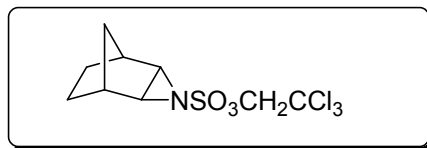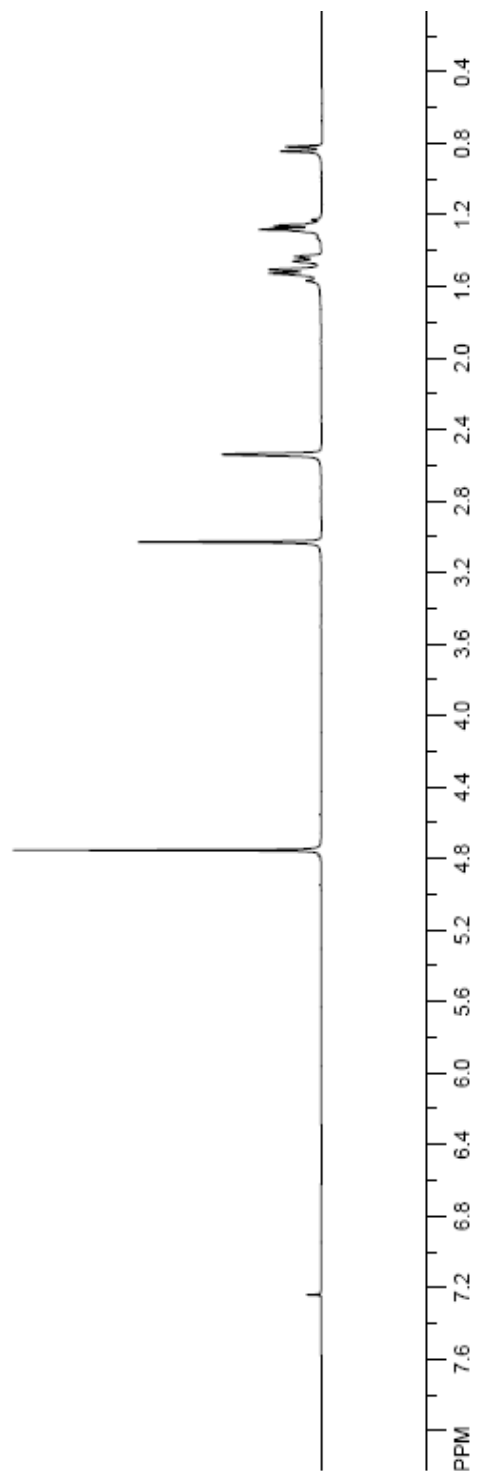

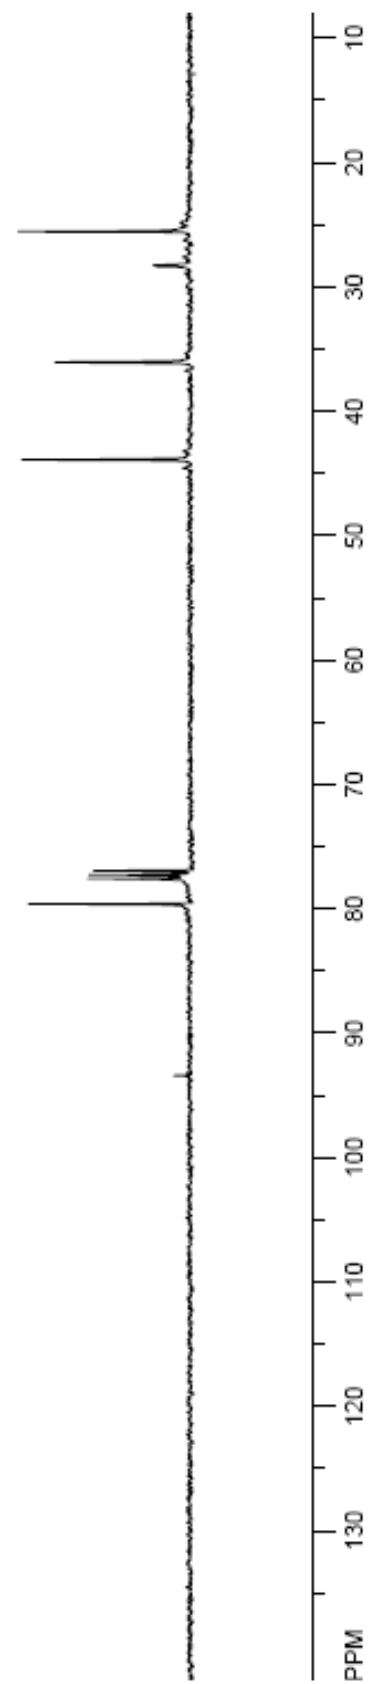

## Recyclability1

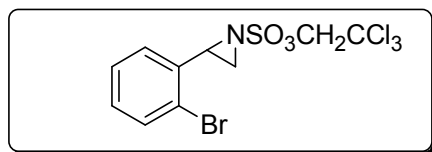

### 2-(2-Bromo-phenyl)-aziridine-1-sulfonic acid 2,2,2-trichloro-ethyl ester

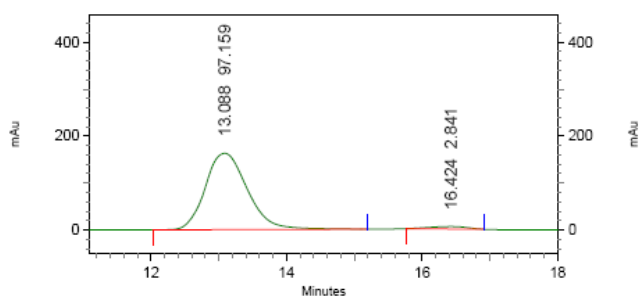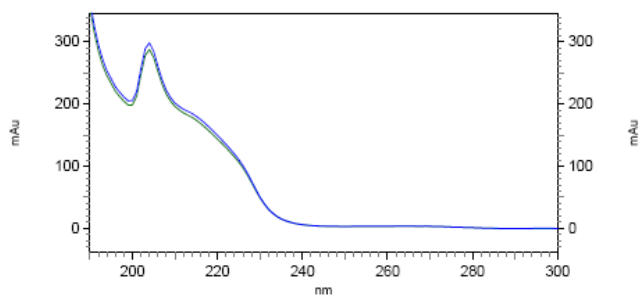

1: 234 nm, 4 nm

Results

| Name   | Retention Time | Area Percent | Pk # |
|--------|----------------|--------------|------|
|        | 13.088         | 97.159       | 1    |
|        | 16.424         | 2.841        | 2    |
| Totals |                | 100.000      |      |

## Recyclability 2

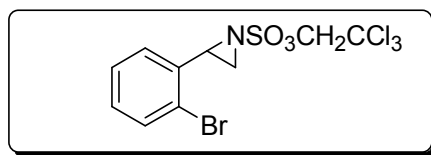

### 2-(2-Bromo-phenyl)-aziridine-1-sulfonic acid 2,2,2-trichloro-ethyl ester

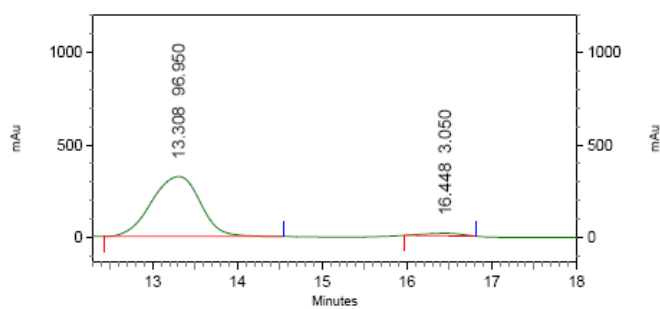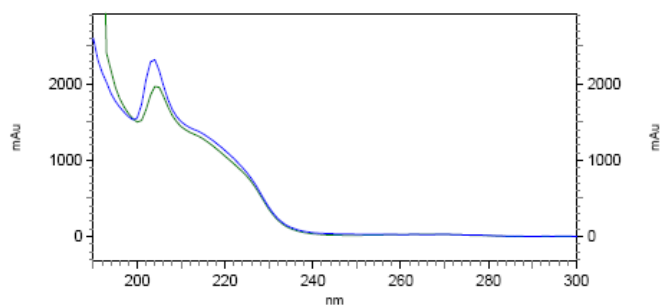

2: 225 nm, 4 nm

Results

| Name | Retention Time | Area Percent | Pk # |
|------|----------------|--------------|------|
|      | 13.308         | 96.950       | 1    |
|      | 16.448         | 3.050        | 2    |

|        |  |         |  |
|--------|--|---------|--|
| Totals |  | 100.000 |  |
|--------|--|---------|--|

### Recyclability 3

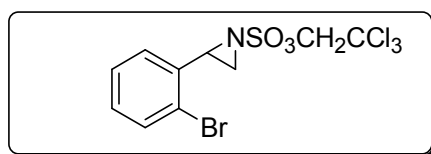

### 2-(2-Bromo-phenyl)-aziridine-1-sulfonic acid 2,2,2-trichloro-ethyl ester

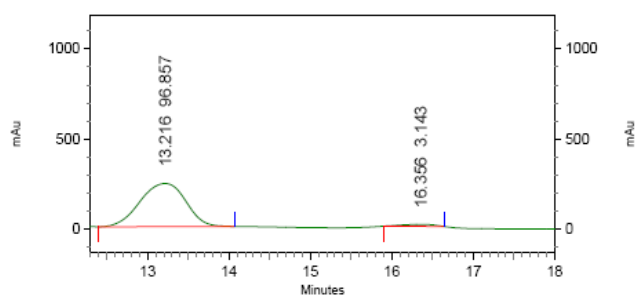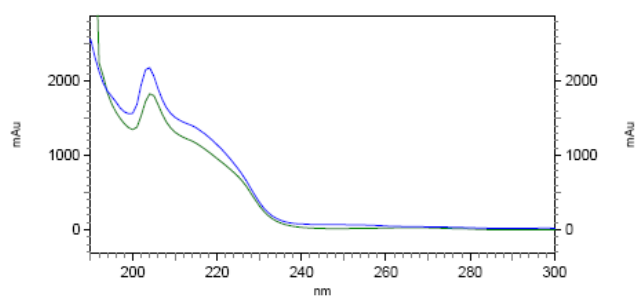

2: 225 nm, 4 nm

Results

| Name | Retention Time | Area Percent | Pk # |
|------|----------------|--------------|------|
|      | 13.216         | 96.857       | 1    |
|      | 16.356         | 3.143        | 2    |

|        |         |
|--------|---------|
| Totals | 100.000 |
|--------|---------|

## Recyclability of [Co(2,6-diMeOZhuPhyrin)]

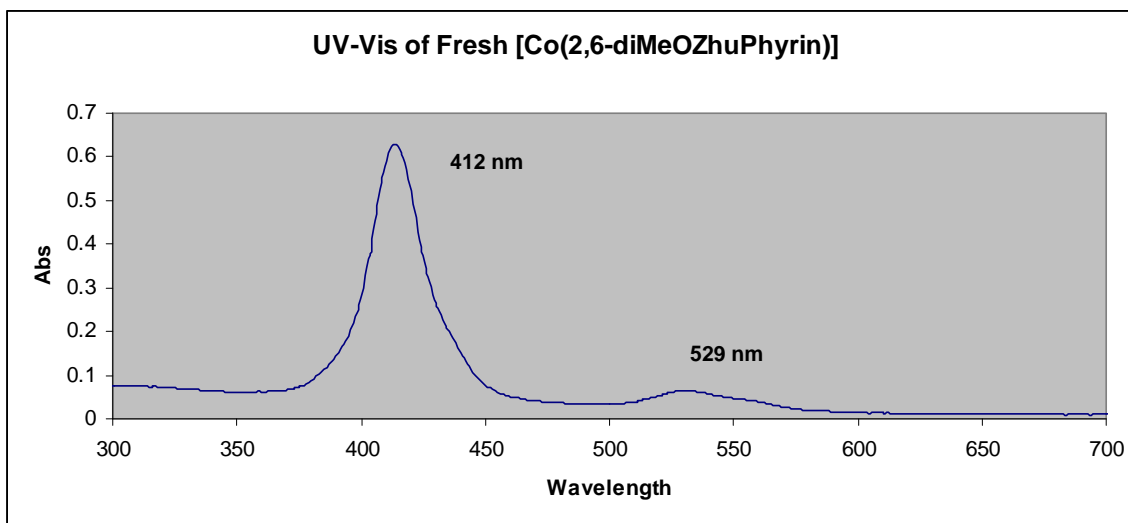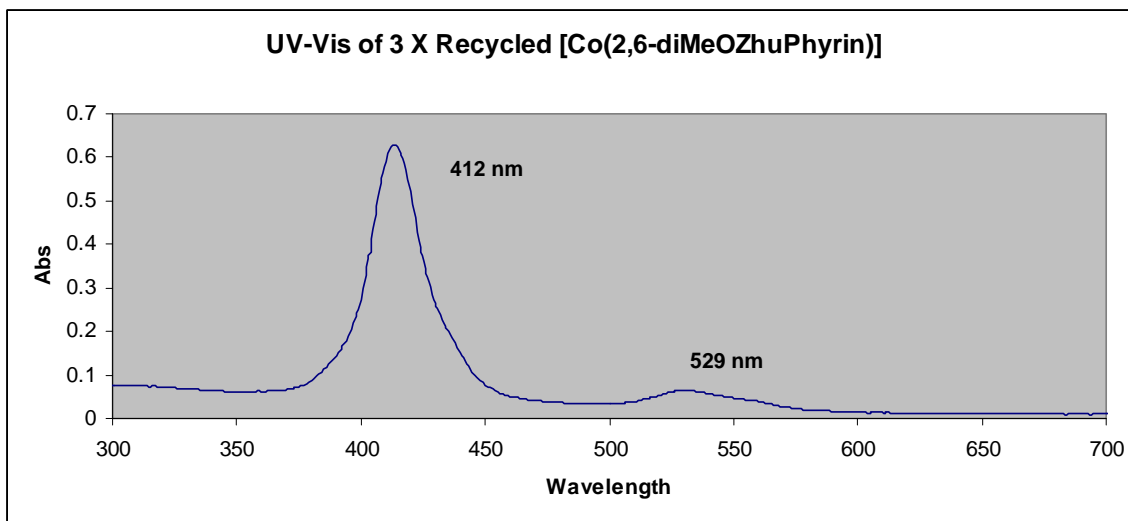

The above UV-Vis spectra demonstrate that the nature of [Co(2,6-diMeOZhuPhyrin)] catalyst is unchanged after recycling the catalyst 3 times through the simple filtration and drying protocol developed for this catalytic process.
